# Supplementary material
Source: MDPI journal article supplement (https://www.mdpi.com/2304-6740/6/2/51)

# checkCIF/PLATON report

Structure factors have been supplied for datablock(s) I

THIS REPORT IS FOR GUIDANCE ONLY. IF USED AS PART OF A REVIEW PROCEDURE FOR PUBLICATION, IT SHOULD NOT REPLACE THE EXPERTISE OF AN EXPERIENCED CRYSTALLOGRAPHIC REFEREE.

No syntax errors found.      CIF dictionary      Interpreting this report

## Datablock: I

---

Bond precision:    C-C = 0.0250 Å                      Wavelength=0.71073

Cell:                      a=18.8863(9)              b=18.8863(9)              c=18.4813(10)  
                            alpha=90                      beta=90                      gamma=90  
Temperature:              293 K

|                        | Calculated                                          | Reported           |
|------------------------|-----------------------------------------------------|--------------------|
| Volume                 | 6592.1(7)                                           | 6592.1(7)          |
| Space group            | I 4 2 2                                             | I 4 2 2            |
| Hall group             | I 4 2                                               | I 4 2              |
| Moiety formula         | C35.92 H35.76 N32 Ni4 S8,<br>4.08(C H3) [+ solvent] | C40 H48 N32 Ni4 S8 |
| Sum formula            | C40 H48 N32 Ni4 S8 [+<br>solvent]                   | C40 H48 N32 Ni4 S8 |
| Mr                     | 1468.34                                             | 1468.42            |
| Dx, g cm <sup>-3</sup> | 0.740                                               | 0.740              |
| Z                      | 2                                                   | 2                  |
| Mu (mm <sup>-1</sup> ) | 0.718                                               | 0.718              |
| F000                   | 1504.0                                              | 1504.0             |
| F000'                  | 1508.89                                             |                    |
| h,k,lmax               | 23,23,23                                            | 23,23,23           |
| Nref                   | 3545[ 2014]                                         | 3526               |
| Tmin,Tmax              | 0.866,0.931                                         | 0.459,0.855        |
| Tmin'                  | 0.866                                               |                    |

Correction method= # Reported T Limits: Tmin=0.459 Tmax=0.855  
AbsCorr = NUMERICAL

Data completeness= 1.75/0.99                      Theta(max)= 26.782

R(reflections)= 0.1191( 1181)                      wR2(reflections)= 0.3937( 3526)

S = 0.989                                      Npar= 97

---

The following ALERTS were generated. Each ALERT has the format

**test-name\_ALERT\_alert-type\_alert-level.**

Click on the hyperlinks for more details of the test.

---

[IMAGE] **Alert level A**

RINTA01\_ALERT\_3\_A The value of Rint is greater than 0.25  
Rint given 0.273  
PLAT020\_ALERT\_3\_A The Value of Rint is Greater Than 0.12 ..... 0.273 Report  
PLAT417\_ALERT\_2\_A Short Inter D-H..H-D H4A ..H4A 1.50 Ang.  
PLAT973\_ALERT\_2\_A Check Calcd Positive Resid. Density on Nil 2.06 eA-3

---

[IMAGE] **Alert level B**

PLAT026\_ALERT\_3\_B Ratio Observed / Unique Reflections (too) Low .. 33% Check  
PLAT084\_ALERT\_3\_B High wR2 Value (i.e. > 0.25) ..... 0.39 Report  
PLAT234\_ALERT\_4\_B Large Hirshfeld Difference N4 --C4 0.26 Ang.  
PLAT341\_ALERT\_3\_B Low Bond Precision on C-C Bonds ..... 0.025 Ang.

---

[IMAGE] **Alert level C**

DIFMX02\_ALERT\_1\_C The maximum difference density is > 0.1\*ZMAX\*0.75  
The relevant atom site should be identified.  
STRVA01\_ALERT\_4\_C Flack test results are ambiguous.  
From the CIF: \_refine\_ls\_abs\_structure\_Flack 0.480  
From the CIF: \_refine\_ls\_abs\_structure\_Flack\_su 0.110  
PLAT082\_ALERT\_2\_C High R1 Value ..... 0.12 Report  
PLAT094\_ALERT\_2\_C Ratio of Maximum / Minimum Residual Density .... 3.58 Report  
PLAT097\_ALERT\_2\_C Large Reported Max. (Positive) Residual Density 2.44 eA-3  
PLAT202\_ALERT\_3\_C Isotropic non-H Atoms in Anion/Solvent ..... 1 Check  
PLAT220\_ALERT\_2\_C Non-Solvent Resd 1 N Ueq(max)/Ueq(min) Range 3.5 Ratio  
PLAT230\_ALERT\_2\_C Hirshfeld Test Diff for N1 --C1\_f . 5.4 s.u.  
PLAT234\_ALERT\_4\_C Large Hirshfeld Difference N3 --C4 0.20 Ang.  
PLAT234\_ALERT\_4\_C Large Hirshfeld Difference C1 --C2 0.18 Ang.  
PLAT241\_ALERT\_2\_C High 'MainMol' Ueq as Compared to Neighbors of S1 Check  
PLAT242\_ALERT\_2\_C Low 'MainMol' Ueq as Compared to Neighbors of Nil Check  
PLAT242\_ALERT\_2\_C Low 'MainMol' Ueq as Compared to Neighbors of C4 Check  
PLAT369\_ALERT\_2\_C Long C(sp2)-C(sp2) Bond C1 - C2 . 1.54 Ang.  
PLAT420\_ALERT\_2\_C D-H Without Acceptor N4 --H4B Please Check  
PLAT905\_ALERT\_3\_C Negative K value in the Analysis of Variance ... -1.155 Report  
PLAT978\_ALERT\_2\_C Number C-C Bonds with Positive Residual Density. 0 Info

---

[IMAGE] **Alert level G**

PLAT007\_ALERT\_5\_G Number of Unrefined Donor-H Atoms ..... 2 Report  
PLAT033\_ALERT\_4\_G Flack x Value Deviates > 3.0 \* sigma from Zero . 0.480 Note  
PLAT042\_ALERT\_1\_G Calc. and Reported MoietyFormula Strings Differ Please Check  
PLAT072\_ALERT\_2\_G SHELXL First Parameter in WGHT Unusually Large 0.20 Report  
PLAT199\_ALERT\_1\_G Reported \_cell\_measurement\_temperature ..... (K) 293 Check  
PLAT200\_ALERT\_1\_G Reported \_diffrn\_ambient\_temperature ..... (K) 293 Check  
PLAT301\_ALERT\_3\_G Main Residue Disorder .....(Resd 1 ) 5% Note  
PLAT302\_ALERT\_4\_G Anion/Solvent/Minor-Residue Disorder (Resd 2 ) 100% Note  
PLAT304\_ALERT\_4\_G Non-Integer Number of Atoms in ..... Resd 1 115.68 Check  
PLAT304\_ALERT\_4\_G Non-Integer Number of Atoms in ..... Resd 2 2.04 Check  
PLAT367\_ALERT\_2\_G Long? C(sp?)-C(sp?) Bond C2 - C3 . 1.53 Ang.  
PLAT432\_ALERT\_2\_G Short Inter X...Y Contact N2 ..C5A 2.47 Ang.  
PLAT432\_ALERT\_2\_G Short Inter X...Y Contact N3 ..C5A 2.28 Ang.  
PLAT432\_ALERT\_2\_G Short Inter X...Y Contact C3 ..C5A 1.92 Ang.  
PLAT606\_ALERT\_4\_G VERY LARGE Solvent Accessible VOID(S) in Structure ! Info  
PLAT721\_ALERT\_1\_G Bond Calc 0.97000, Rep 0.96000 Dev... 0.01 Ang.  
C5A -H5A 1.555 1.555 ..... # 22 Check

|                                                                    |       |              |                |            |
|--------------------------------------------------------------------|-------|--------------|----------------|------------|
| PLAT721_ALERT_1_G Bond                                             | Calc  | 0.97000, Rep | 0.96000 Dev... | 0.01 Ang.  |
| C5B                                                                | -H5F  | 1.555        | 1.555 .....    | # 27 Check |
| PLAT764_ALERT_4_G Overcomplete CIF Bond List Detected (Rep/Expd)   |       |              |                | 1.13 Ratio |
| PLAT773_ALERT_2_G Check long C-C Bond in CIF: C3                   | --C5A |              |                | 1.92 Ang.  |
| PLAT790_ALERT_4_G Centre of Gravity not Within Unit Cell: Resd.    | #     |              |                | 2 Note     |
| C H3                                                               |       |              |                |            |
| PLAT869_ALERT_4_G ALERTS Related to the Use of SQUEEZE Suppressed  |       |              |                | ! Info     |
| PLAT910_ALERT_3_G Missing # of FCF Reflection(s) Below Theta(Min). |       |              |                | 2 Note     |
| PLAT912_ALERT_4_G Missing # of FCF Reflections Above STh/L=        | 0.600 |              |                | 6 Note     |

---

4 **ALERT level A** = Most likely a serious problem - resolve or explain  
4 **ALERT level B** = A potentially serious problem, consider carefully  
17 **ALERT level C** = Check. Ensure it is not caused by an omission or oversight  
23 **ALERT level G** = General information/check it is not something unexpected

6 ALERT type 1 CIF construction/syntax error, inconsistent or missing data  
19 ALERT type 2 Indicator that the structure model may be wrong or deficient  
9 ALERT type 3 Indicator that the structure quality may be low  
13 ALERT type 4 Improvement, methodology, query or suggestion  
1 ALERT type 5 Informative message, check

---

## checkCIF publication errors

---

### [IMAGE] Alert level A

PUBL006\_ALERT\_1\_A \_publ\_requested\_journal is missing  
e.g. 'Acta Crystallographica Section C'  
PUBL008\_ALERT\_1\_A \_publ\_section\_title is missing. Title of paper.  
PUBL012\_ALERT\_1\_A \_publ\_section\_abstract is missing.  
Abstract of paper in English.

---

### [IMAGE] Alert level G

PUBL017\_ALERT\_1\_G The \_publ\_section\_references section is missing or empty.

---

3 **ALERT level A** = Data missing that is essential or data in wrong format  
1 **ALERT level G** = General alerts. Data that may be required is missing

---

## Publication of your CIF

You should attempt to resolve as many as possible of the alerts in all categories. Often the minor alerts point to easily fixed oversights, errors and omissions in your CIF or refinement strategy, so attention to these fine details can be worthwhile. In order to resolve some of the more serious problems it may be necessary to carry out additional measurements or structure refinements. However, the nature of your study may justify the reported deviations from journal submission requirements and the more serious of these should be commented upon in the discussion or experimental section of a paper or in the "special\_details" fields of the CIF. *checkCIF* was carefully designed to identify outliers and unusual parameters, but every test has its limitations and alerts that are not important in a particular case may appear. Conversely, the absence of alerts does not guarantee there are no aspects of the results needing attention. It is up to the individual to critically assess their own results and, if necessary, seek expert advice.

If level A alerts remain, which you believe to be justified deviations, and you intend to submit this CIF for publication in a journal, you should additionally insert an explanation in your CIF using the Validation Reply Form (VRF) below. This will allow your explanation to be considered as part of the review process.

## Validation response form

Please find below a validation response form (VRF) that can be filled in and pasted into your CIF.

```
# start Validation Reply Form
_vrf_PUBL006_GLOBAL
;
PROBLEM: _publ_requested_journal is missing
RESPONSE: ...
;
_vrf_PUBL008_GLOBAL
;
PROBLEM: _publ_section_title is missing. Title of paper.
RESPONSE: ...
;
_vrf_PUBL012_GLOBAL
;
PROBLEM: _publ_section_abstract is missing.
RESPONSE: ...
;
_vrf_RINTA01_I
;
PROBLEM: The value of Rint is greater than 0.25
RESPONSE: ...
;
_vrf_PLAT020_I
;
PROBLEM: The Value of Rint is Greater Than 0.12 ..... 0.273 Report
RESPONSE: ...
;
_vrf_PLAT417_I
;
PROBLEM: Short Inter D-H..H-D      H4A      ..H4A      1.50 Ang.
RESPONSE: ...
;
_vrf_PLAT973_I
;
```

PROBLEM: Check Calcd Positive Resid. Density on      Nil1      2.06 eA-3  
 RESPONSE: ...  
 ;  
 # end Validation Reply Form

If you wish to submit your CIF for publication in Acta Crystallographica Section C or E, you should upload your CIF via the web. If you wish to submit your CIF for publication in IUCrData you should upload your CIF via the web. If your CIF is to form part of a submission to another IUCr journal, you will be asked, either during electronic submission or by the Co-editor handling your paper, to upload your CIF via our web site.

## PLATON version of 30/01/2018; check.def file version of 30/01/2018

Datablock I - ellipsoid plot

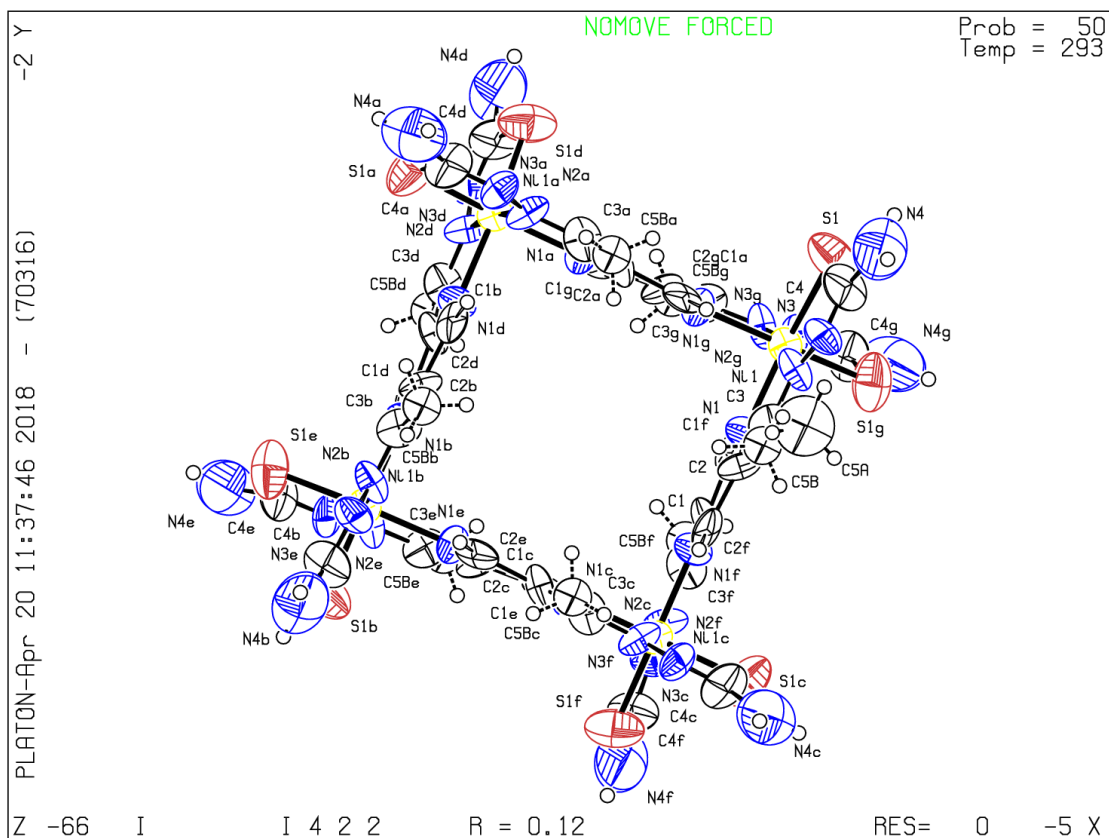

Supplement: s1 [file s1]
