# Supplementary material
Source: MDPI journal article supplement (https://www.mdpi.com/2304-6740/6/2/51)

# checkCIF/PLATON report

Structure factors have been supplied for datablock(s) I

THIS REPORT IS FOR GUIDANCE ONLY. IF USED AS PART OF A REVIEW PROCEDURE FOR PUBLICATION, IT SHOULD NOT REPLACE THE EXPERTISE OF AN EXPERIENCED CRYSTALLOGRAPHIC REFEREE.

No syntax errors found.      CIF dictionary      Interpreting this report

## Datablock: I

---

|                                                               |                    |                                  |
|---------------------------------------------------------------|--------------------|----------------------------------|
| Bond precision:                                               | C-C = 0.0367 A     | Wavelength=0.71073               |
| Cell:                                                         | a=19.0949(11)      | b=19.0949(11)      c=21.3112(13) |
|                                                               | alpha=90           | beta=90      gamma=90            |
| Temperature:                                                  | 293 K              |                                  |
|                                                               | Calculated         | Reported                         |
| Volume                                                        | 7770.4(10)         | 7770.4(10)                       |
| Space group                                                   | I 4 2 2            | I 4 2 2                          |
| Hall group                                                    | I 4 2              | I 4 2                            |
| Moiety formula                                                | C80 H64 N32 S8 Zn4 | C80 H64 N32 S8 Zn4               |
| Sum formula                                                   | C80 H64 N32 S8 Zn4 | C80 H64 N32 S8 Zn4               |
| Mr                                                            | 1991.67            | 1991.59                          |
| Dx,g cm-3                                                     | 0.851              | 0.851                            |
| Z                                                             | 2                  | 2                                |
| Mu (mm-1)                                                     | 0.754              | 0.754                            |
| F000                                                          | 2032.0             | 2032.0                           |
| F000'                                                         | 2036.63            |                                  |
| h,k,lmax                                                      | 24,24,27           | 24,24,26                         |
| Nref                                                          | 4183[ 2369]        | 4143                             |
| Tmin,Tmax                                                     | 0.762,0.798        | 0.719,0.937                      |
| Tmin'                                                         | 0.686              |                                  |
| Correction method= # Reported T Limits: Tmin=0.719 Tmax=0.937 |                    |                                  |
| AbsCorr = NUMERICAL                                           |                    |                                  |
| Data completeness=                                            | 1.75/0.99          | Theta(max)= 26.802               |
| R(reflections)=                                               | 0.1635( 1419)      | wR2(reflections)= 0.4430( 4143)  |
| S =                                                           | 1.189              | Npar= 142                        |

---

The following ALERTS were generated. Each ALERT has the format

**test-name\_ALERT\_alert-type\_alert-level.**

Click on the hyperlinks for more details of the test.

---

**Alert level A**

PLAT602\_ALERT\_2\_A VERY LARGE Solvent Accessible VOID(S) in Structure ! Info

---

**Alert level B**

RINTA01\_ALERT\_3\_B The value of Rint is greater than 0.18

Rint given 0.186

|                   |                                                  |         |        |
|-------------------|--------------------------------------------------|---------|--------|
| PLAT020_ALERT_3_B | The Value of Rint is Greater Than 0.12 .....     | 0.186   | Report |
| PLAT026_ALERT_3_B | Ratio Observed / Unique Reflections (too) Low .. | 34%     | Check  |
| PLAT049_ALERT_1_B | Calculated Density Less Than 1.0 gcm-3 .....     | 0.8513  | Check  |
| PLAT082_ALERT_2_B | High R1 Value .....                              | 0.16    | Report |
| PLAT084_ALERT_3_B | High wR2 Value (i.e. > 0.25) .....               | 0.44    | Report |
| PLAT230_ALERT_2_B | Hirshfeld Test Diff for N2 --C3 .                | 10.5    | s.u.   |
| PLAT230_ALERT_2_B | Hirshfeld Test Diff for N3 --C10 .               | 9.5     | s.u.   |
| PLAT234_ALERT_4_B | Large Hirshfeld Difference N2 --N3               | 0.26    | Ang.   |
| PLAT330_ALERT_2_B | Large Average Phenyl C-C Dist C4 -C14            | 1.42    | Ang.   |
| PLAT332_ALERT_2_B | Large Phenyl C-C Range C4 -C14                   | 0.35    | Ang.   |
| PLAT341_ALERT_3_B | Low Bond Precision on C-C Bonds .....            | 0.03667 | Ang.   |

---

**Alert level C**

DIFMX02\_ALERT\_1\_C The maximum difference density is > 0.1\*ZMAX\*0.75

The relevant atom site should be identified.

STRVA01\_ALERT\_4\_C Flack test results are ambiguous.

From the CIF: \_refine\_ls\_abs\_structure\_Flack 0.670

From the CIF: \_refine\_ls\_abs\_structure\_Flack\_su 0.140

|                   |                                                  |        |        |
|-------------------|--------------------------------------------------|--------|--------|
| PLAT094_ALERT_2_C | Ratio of Maximum / Minimum Residual Density .... | 3.10   | Report |
| PLAT097_ALERT_2_C | Large Reported Max. (Positive) Residual Density  | 2.27   | eA-3   |
| PLAT230_ALERT_2_C | Hirshfeld Test Diff for N1 --C1 .                | 6.2    | s.u.   |
| PLAT234_ALERT_4_C | Large Hirshfeld Difference Zn1 --N2              | 0.22   | Ang.   |
| PLAT241_ALERT_2_C | High 'MainMol' Ueq as Compared to Neighbors of   | S1     | Check  |
| PLAT241_ALERT_2_C | High 'MainMol' Ueq as Compared to Neighbors of   | N2     | Check  |
| PLAT241_ALERT_2_C | High 'MainMol' Ueq as Compared to Neighbors of   | N3     | Check  |
| PLAT241_ALERT_2_C | High 'MainMol' Ueq as Compared to Neighbors of   | C8     | Check  |
| PLAT242_ALERT_2_C | Low 'MainMol' Ueq as Compared to Neighbors of    | Zn1    | Check  |
| PLAT242_ALERT_2_C | Low 'MainMol' Ueq as Compared to Neighbors of    | C3     | Check  |
| PLAT242_ALERT_2_C | Low 'MainMol' Ueq as Compared to Neighbors of    | C10    | Check  |
| PLAT368_ALERT_2_C | Short C(sp2)-C(sp2) Bond C8 - C12 .              | 1.21   | Ang.   |
| PLAT369_ALERT_2_C | Long C(sp2)-C(sp2) Bond C8 - C9 .                | 1.56   | Ang.   |
| PLAT420_ALERT_2_C | D-H Without Acceptor N5 --H5A                    | Please | Check  |
| PLAT420_ALERT_2_C | D-H Without Acceptor N5 --H5B                    | Please | Check  |
| PLAT906_ALERT_3_C | Large K Value in the Analysis of Variance .....  | 9.807  | Check  |
| PLAT906_ALERT_3_C | Large K Value in the Analysis of Variance .....  | 2.800  | Check  |
| PLAT907_ALERT_2_C | Flack x > 0.5, Structure Needs to be Inverted? . | 0.67   | Check  |
| PLAT911_ALERT_3_C | Missing FCF Refl Between Thmin & STh/L= 0.600    | 7      | Report |
| PLAT918_ALERT_3_C | Reflection(s) with I(obs) much Smaller I(calc) . | 5      | Check  |
| PLAT971_ALERT_2_C | Check Calcd Resid. Dens. 0.93A From C14          | 2.21   | eA-3   |
| PLAT971_ALERT_2_C | Check Calcd Resid. Dens. 0.93A From C14          | 1.53   | eA-3   |
| PLAT975_ALERT_2_C | Check Calcd Resid. Dens. 0.90A From N5           | 0.44   | eA-3   |
| PLAT978_ALERT_2_C | Number C-C Bonds with Positive Residual Density. | 0      | Info   |

---

**Alert level G**

|                   |                                                  |       |        |
|-------------------|--------------------------------------------------|-------|--------|
| PLAT003_ALERT_2_G | Number of Uiso or Uij Restrained non-H Atoms ... | 6     | Report |
| PLAT007_ALERT_5_G | Number of Unrefined Donor-H Atoms .....          | 2     | Report |
| PLAT033_ALERT_4_G | Flack x Value Deviates > 3.0 * sigma from Zero . | 0.670 | Note   |
| PLAT072_ALERT_2_G | SHELXL First Parameter in WGHT Unusually Large   | 0.20  | Report |
| PLAT174_ALERT_4_G | The CIF-Embedded .res File Contains FLAT Records | 1     | Report |
| PLAT177_ALERT_4_G | The CIF-Embedded .res File Contains DELU Records | 1     | Report |
| PLAT178_ALERT_4_G | The CIF-Embedded .res File Contains SIMU Records | 1     | Report |
| PLAT186_ALERT_4_G | The CIF-Embedded .res File Contains ISOR Records | 1     | Report |

|                   |                                                  |     |     |       |
|-------------------|--------------------------------------------------|-----|-----|-------|
| PLAT199_ALERT_1_G | Reported _cell_measurement_temperature .....     | (K) | 293 | Check |
| PLAT200_ALERT_1_G | Reported _diffrn_ambient_temperature .....       | (K) | 293 | Check |
| PLAT860_ALERT_3_G | Number of Least-Squares Restraints .....         |     | 87  | Note  |
| PLAT898_ALERT_4_G | Second Reported H-M Symbol in CIF Ignored .....  |     | !   | Check |
| PLAT910_ALERT_3_G | Missing # of FCF Reflection(s) Below Theta(Min). |     | 3   | Note  |
| PLAT912_ALERT_4_G | Missing # of FCF Reflections Above STh/L= 0.600  |     | 12  | Note  |
| PLAT933_ALERT_2_G | Number of OMIT Records in Embedded .res File ... |     | 8   | Note  |

---

1 **ALERT level A** = Most likely a serious problem - resolve or explain  
 12 **ALERT level B** = A potentially serious problem, consider carefully  
 26 **ALERT level C** = Check. Ensure it is not caused by an omission or oversight  
 15 **ALERT level G** = General information/check it is not something unexpected

4 ALERT type 1 CIF construction/syntax error, inconsistent or missing data  
 28 ALERT type 2 Indicator that the structure model may be wrong or deficient  
 11 ALERT type 3 Indicator that the structure quality may be low  
 10 ALERT type 4 Improvement, methodology, query or suggestion  
 1 ALERT type 5 Informative message, check

---

## checkCIF publication errors

---

### Alert level A

PUBL004\_ALERT\_1\_A The contact author's name and address are missing,  
     \_publ\_contact\_author\_name and \_publ\_contact\_author\_address.  
 PUBL005\_ALERT\_1\_A \_publ\_contact\_author\_email, \_publ\_contact\_author\_fax and  
     \_publ\_contact\_author\_phone are all missing.  
     At least one of these should be present.  
 PUBL008\_ALERT\_1\_A \_publ\_section\_title is missing. Title of paper.  
 PUBL009\_ALERT\_1\_A \_publ\_author\_name is missing. List of author(s) name(s).  
 PUBL010\_ALERT\_1\_A \_publ\_author\_address is missing. Author(s) address(es).  
 PUBL012\_ALERT\_1\_A \_publ\_section\_abstract is missing.  
     Abstract of paper in English.

---

### Alert level G

PUBL017\_ALERT\_1\_G The \_publ\_section\_references section is missing or  
     empty.

---

6 **ALERT level A** = Data missing that is essential or data in wrong format  
 1 **ALERT level G** = General alerts. Data that may be required is missing

---

## Publication of your CIF

You should attempt to resolve as many as possible of the alerts in all categories. Often the minor alerts point to easily fixed oversights, errors and omissions in your CIF or refinement strategy, so attention to these fine details can be worthwhile. In order to resolve some of the more serious problems it may be necessary to carry out additional measurements or structure refinements. However, the nature of your study may justify the reported deviations from journal submission requirements and the more serious of these should be commented upon in the discussion or experimental section of a paper or in the "special\_details" fields of the CIF. *checkCIF* was carefully designed to identify outliers and unusual parameters, but every test has its limitations and alerts that are not important in a particular case may appear. Conversely, the absence of alerts does not guarantee there are no aspects of the results needing attention. It is up to the individual to critically assess their own results and, if necessary, seek expert advice.

If level A alerts remain, which you believe to be justified deviations, and you intend to submit this CIF for publication in a journal, you should additionally insert an explanation in your CIF using the Validation Reply Form (VRF) below. This will allow your explanation to be considered as part of the review process.

## Validation response form

Please find below a validation response form (VRF) that can be filled in and pasted into your CIF.

```
# start Validation Reply Form
_vrf_PUBL004_GLOBAL
;
PROBLEM: The contact author's name and address are missing,
RESPONSE: ...
;
_vrf_PUBL005_GLOBAL
;
PROBLEM: _publ_contact_author_email, _publ_contact_author_fax and
RESPONSE: ...
;
_vrf_PUBL008_GLOBAL
;
PROBLEM: _publ_section_title is missing. Title of paper.
RESPONSE: ...
;
_vrf_PUBL009_GLOBAL
;
PROBLEM: _publ_author_name is missing. List of author(s) name(s).
RESPONSE: ...
;
_vrf_PUBL010_GLOBAL
;
PROBLEM: _publ_author_address is missing. Author(s) address(es).
RESPONSE: ...
;
_vrf_PUBL012_GLOBAL
;
PROBLEM: _publ_section_abstract is missing.
RESPONSE: ...
;
_vrf_PLAT602_I
;
```

PROBLEM: VERY LARGE Solvent Accessible VOID(S) in Structure

! Info

RESPONSE: ...

;

# end Validation Reply Form

If you wish to submit your CIF for publication in Acta Crystallographica Section C or E, you should upload your CIF via the web. If you wish to submit your CIF for publication in IUCrData you should upload your CIF via the web. If your CIF is to form part of a submission to another IUCr journal, you will be asked, either during electronic submission or by the Co-editor handling your paper, to upload your CIF via our web site.

**PLATON version of 30/01/2018; check.def file version of 30/01/2018**

Datablock I - ellipsoid plot

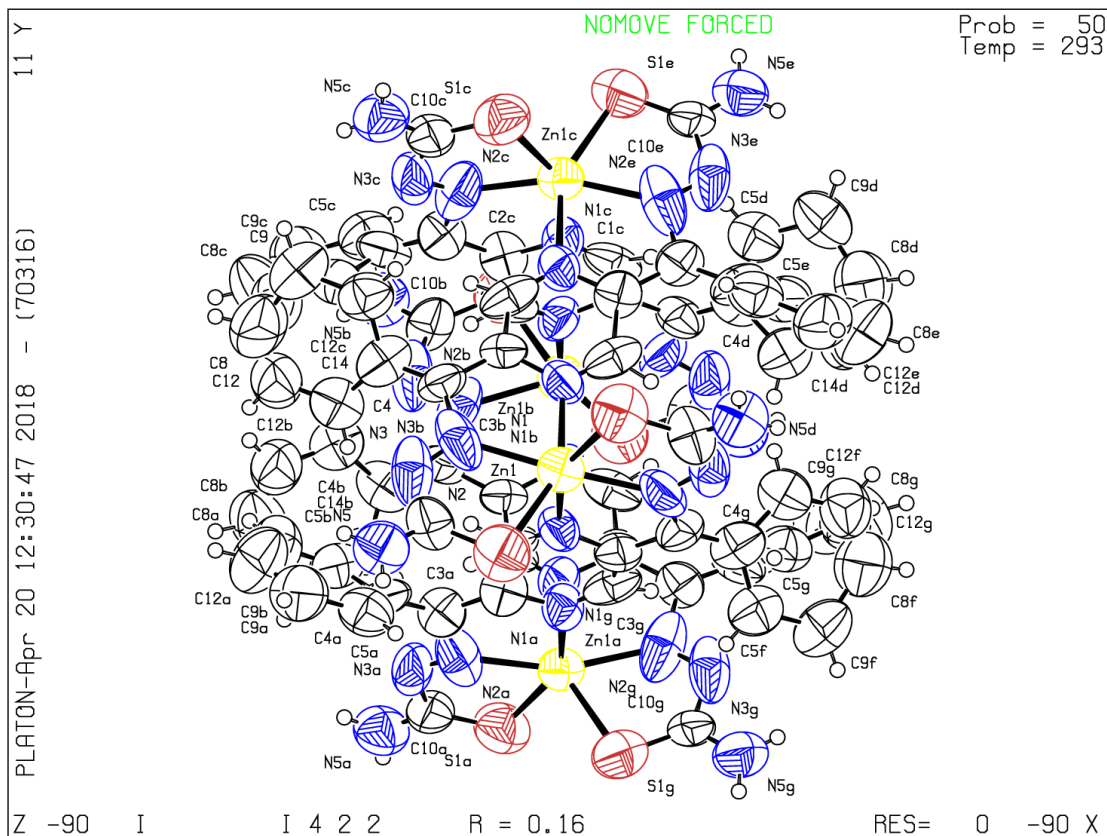

Supplement: s1 [file s1]
