# Supplementary material
Source: MDPI journal article supplement (https://www.mdpi.com/2304-6740/6/2/51)

# checkCIF/PLATON report

Structure factors have been supplied for datablock(s) I

THIS REPORT IS FOR GUIDANCE ONLY. IF USED AS PART OF A REVIEW PROCEDURE FOR PUBLICATION, IT SHOULD NOT REPLACE THE EXPERTISE OF AN EXPERIENCED CRYSTALLOGRAPHIC REFEREE.

No syntax errors found.      CIF dictionary      Interpreting this report

## Datablock: I

---

|                              |                                   |                                 |               |
|------------------------------|-----------------------------------|---------------------------------|---------------|
| Bond precision:              | C-C = 0.0272 Å                    | Wavelength=0.71073              |               |
| Cell:                        | a=20.4341(15)                     | b=20.4341(15)                   | c=19.3550(19) |
|                              | alpha=90                          | beta=90                         | gamma=90      |
| Temperature:                 | 293 K                             |                                 |               |
|                              | Calculated                        | Reported                        |               |
| Volume                       | 8081.7(14)                        | 8081.7(14)                      |               |
| Space group                  | I 4 2 2                           | I 4 2 2                         |               |
| Hall group                   | I 4 2                             | I 4 2                           |               |
| Moiety formula               | C56 H80 N32 Ni4 S8 [+<br>solvent] | C56 H80 N32 Ni4 S8              |               |
| Sum formula                  | C56 H80 N32 Ni4 S8 [+<br>solvent] | C56 H80 N32 Ni4 S8              |               |
| Mr                           | 1692.76                           | 1692.84                         |               |
| Dx, g cm <sup>-3</sup>       | 0.696                             | 0.696                           |               |
| Z                            | 2                                 | 2                               |               |
| Mu (mm <sup>-1</sup> )       | 0.590                             | 0.590                           |               |
| F000                         | 1760.0                            | 1760.0                          |               |
| F000'                        | 1764.96                           |                                 |               |
| h,k,lmax                     | 26,26,25                          | 26,26,25                        |               |
| Nref                         | 4605[ 2593]                       | 4581                            |               |
| Tmin,Tmax                    | 0.809,0.838                       |                                 |               |
| Tmin'                        | 0.745                             |                                 |               |
| Correction method= Not given |                                   |                                 |               |
| Data completeness=           | 1.77/0.99                         | Theta(max)= 27.349              |               |
| R(reflections)=              | 0.1086( 2301)                     | wR2(reflections)= 0.3618( 4581) |               |
| S =                          | 1.224                             | Npar= 103                       |               |

---

The following ALERTS were generated. Each ALERT has the format

**test-name\_ALERT\_alert-type\_alert-level.**

Click on the hyperlinks for more details of the test.

---

[IMAGE] **Alert level A**

PLAT973\_ALERT\_2\_A Check Calcd Positive Resid. Density on Ni01 2.07 eA-3

---

[IMAGE] **Alert level B**

SHFSU01\_ALERT\_2\_B The absolute value of parameter shift to su ratio > 0.10

Absolute value of the parameter shift to su ratio given 0.141

Additional refinement cycles may be required.

|                   |                                                |        |        |
|-------------------|------------------------------------------------|--------|--------|
| PLAT080_ALERT_2_B | Maximum Shift/Error .....                      | 0.14   | Why ?  |
| PLAT084_ALERT_3_B | High wR2 Value (i.e. > 0.25) .....             | 0.36   | Report |
| PLAT241_ALERT_2_B | High 'MainMol' Ueq as Compared to Neighbors of | C5     | Check  |
| PLAT242_ALERT_2_B | Low 'MainMol' Ueq as Compared to Neighbors of  | C3     | Check  |
| PLAT341_ALERT_3_B | Low Bond Precision on C-C Bonds .....          | 0.0272 | Ang.   |
| PLAT360_ALERT_2_B | Short C(sp3)-C(sp3) Bond C5 - C6               | 1.28   | Ang.   |
| PLAT360_ALERT_2_B | Short C(sp3)-C(sp3) Bond C5 - C7               | 1.28   | Ang.   |

---

[IMAGE] **Alert level C**

STRVA01\_ALERT\_4\_C Flack test results are ambiguous.

From the CIF: \_refine\_ls\_abs\_structure\_Flack 0.550

From the CIF: \_refine\_ls\_abs\_structure\_Flack\_su 0.060

|                   |                                                  |      |              |
|-------------------|--------------------------------------------------|------|--------------|
| PLAT082_ALERT_2_C | High R1 Value .....                              | 0.11 | Report       |
| PLAT094_ALERT_2_C | Ratio of Maximum / Minimum Residual Density .... | 3.26 | Report       |
| PLAT220_ALERT_2_C | Non-Solvent Resd 1 C Ueq(max)/Ueq(min) Range     | 3.8  | Ratio        |
| PLAT222_ALERT_3_C | Non-Solv. Resd 1 H Uiso(max)/Uiso(min) Range     | 4.8  | Ratio        |
| PLAT230_ALERT_2_C | Hirshfeld Test Diff for S1 --C4                  | 5.3  | s.u.         |
| PLAT230_ALERT_2_C | Hirshfeld Test Diff for N3 --C4                  | 6.7  | s.u.         |
| PLAT250_ALERT_2_C | Large U3/U1 Ratio for Average U(i,j) Tensor .... | 2.3  | Note         |
| PLAT412_ALERT_2_C | Short Intra XH3 .. XHn H1 ..H6C                  | 1.85 | Ang.         |
| PLAT420_ALERT_2_C | D-H Without Acceptor N4 --H4A                    |      | Please Check |
| PLAT420_ALERT_2_C | D-H Without Acceptor N4 --H4B                    |      | Please Check |
| PLAT761_ALERT_1_C | CIF Contains no X-H Bonds .....                  |      | Please Check |
| PLAT762_ALERT_1_C | CIF Contains no X-Y-H or H-Y-H Angles .....      |      | Please Check |
| PLAT907_ALERT_2_C | Flack x > 0.5, Structure Needs to be Inverted? . | 0.55 | Check        |
| PLAT918_ALERT_3_C | Reflection(s) with I(obs) much Smaller I(calc) . | 1    | Check        |
| PLAT934_ALERT_3_C | Number of (Iobs-Icalc)/SigmaW > 10 Outliers .... | 1    | Check        |
| PLAT978_ALERT_2_C | Number C-C Bonds with Positive Residual Density. | 0    | Info         |

---

[IMAGE] **Alert level G**

|                   |                                                    |       |        |
|-------------------|----------------------------------------------------|-------|--------|
| PLAT003_ALERT_2_G | Number of Uiso or Uij Restrained non-H Atoms ...   | 3     | Report |
| PLAT007_ALERT_5_G | Number of Unrefined Donor-H Atoms .....            | 2     | Report |
| PLAT033_ALERT_4_G | Flack x Value Deviates > 3.0 * sigma from Zero .   | 0.550 | Note   |
| PLAT072_ALERT_2_G | SHELXL First Parameter in WGHT Unusually Large     | 0.20  | Report |
| PLAT171_ALERT_4_G | The CIF-Embedded .res File Contains EADP Records   | 1     | Report |
| PLAT177_ALERT_4_G | The CIF-Embedded .res File Contains DELU Records   | 1     | Report |
| PLAT178_ALERT_4_G | The CIF-Embedded .res File Contains SIMU Records   | 1     | Report |
| PLAT186_ALERT_4_G | The CIF-Embedded .res File Contains ISOR Records   | 1     | Report |
| PLAT199_ALERT_1_G | Reported _cell_measurement_temperature ..... (K)   | 293   | Check  |
| PLAT200_ALERT_1_G | Reported _diffrn_ambient_temperature ..... (K)     | 293   | Check  |
| PLAT343_ALERT_2_G | Unusual sp3 Angle Range in Main Residue for        | C5    | Check  |
| PLAT606_ALERT_4_G | VERY LARGE Solvent Accessible VOID(S) in Structure | !     | Info   |
| PLAT720_ALERT_4_G | Number of Unusual/Non-Standard Labels .....        | 1     | Note   |
| PLAT860_ALERT_3_G | Number of Least-Squares Restraints .....           | 33    | Note   |
| PLAT912_ALERT_4_G | Missing # of FCF Reflections Above STh/L= 0.600    | 5     | Note   |
| PLAT933_ALERT_2_G | Number of OMIT Records in Embedded .res File ...   | 1     | Note   |

---

1 **ALERT level A** = Most likely a serious problem - resolve or explain  
8 **ALERT level B** = A potentially serious problem, consider carefully  
17 **ALERT level C** = Check. Ensure it is not caused by an omission or oversight  
16 **ALERT level G** = General information/check it is not something unexpected

4 ALERT type 1 CIF construction/syntax error, inconsistent or missing data  
22 ALERT type 2 Indicator that the structure model may be wrong or deficient  
6 ALERT type 3 Indicator that the structure quality may be low  
9 ALERT type 4 Improvement, methodology, query or suggestion  
1 ALERT type 5 Informative message, check

---

## checkCIF publication errors

---

### [IMAGE] Alert level A

PUBL006\_ALERT\_1\_A \_publ\_requested\_journal is missing  
e.g. 'Acta Crystallographica Section C'  
PUBL008\_ALERT\_1\_A \_publ\_section\_title is missing. Title of paper.  
PUBL012\_ALERT\_1\_A \_publ\_section\_abstract is missing.  
Abstract of paper in English.

---

### [IMAGE] Alert level G

PUBL017\_ALERT\_1\_G The \_publ\_section\_references section is missing or  
empty.

---

3 **ALERT level A** = Data missing that is essential or data in wrong format  
1 **ALERT level G** = General alerts. Data that may be required is missing

---

## Publication of your CIF

You should attempt to resolve as many as possible of the alerts in all categories. Often the minor alerts point to easily fixed oversights, errors and omissions in your CIF or refinement strategy, so attention to these fine details can be worthwhile. In order to resolve some of the more serious problems it may be necessary to carry out additional measurements or structure refinements. However, the nature of your study may justify the reported deviations from journal submission requirements and the more serious of these should be commented upon in the discussion or experimental section of a paper or in the "special\_details" fields of the CIF. *checkCIF* was carefully designed to identify outliers and unusual parameters, but every test has its limitations and alerts that are not important in a particular case may appear. Conversely, the absence of alerts does not guarantee there are no aspects of the results needing attention. It is up to the individual to critically assess their own results and, if necessary, seek expert advice.

If level A alerts remain, which you believe to be justified deviations, and you intend to submit this CIF for publication in a journal, you should additionally insert an explanation in your CIF using the Validation Reply Form (VRF) below. This will allow your explanation to be considered as part of the review process.

## Validation response form

Please find below a validation response form (VRF) that can be filled in and pasted into your CIF.

```
# start Validation Reply Form
_vrf_PUBL006_GLOBAL
;
PROBLEM: _publ_requested_journal is missing
RESPONSE: ...
;
_vrf_PUBL008_GLOBAL
;
PROBLEM: _publ_section_title is missing. Title of paper.
RESPONSE: ...
;
_vrf_PUBL012_GLOBAL
;
PROBLEM: _publ_section_abstract is missing.
RESPONSE: ...
;
_vrf_PLAT973_I
;
PROBLEM: Check Calcd Positive Resid. Density on      Ni01      2.07 eA-3
RESPONSE: ...
;
# end Validation Reply Form
```

If you wish to submit your CIF for publication in Acta Crystallographica Section C or E, you should upload your CIF via the web. If you wish to submit your CIF for publication in IUCrData you should upload your CIF via the web. If your CIF is to form part of a submission to another IUCr journal, you will be asked, either during electronic submission or by the Co-editor handling your paper, to upload your CIF via our web site.

---

**PLATON version of 30/01/2018; check.def file version of 30/01/2018**

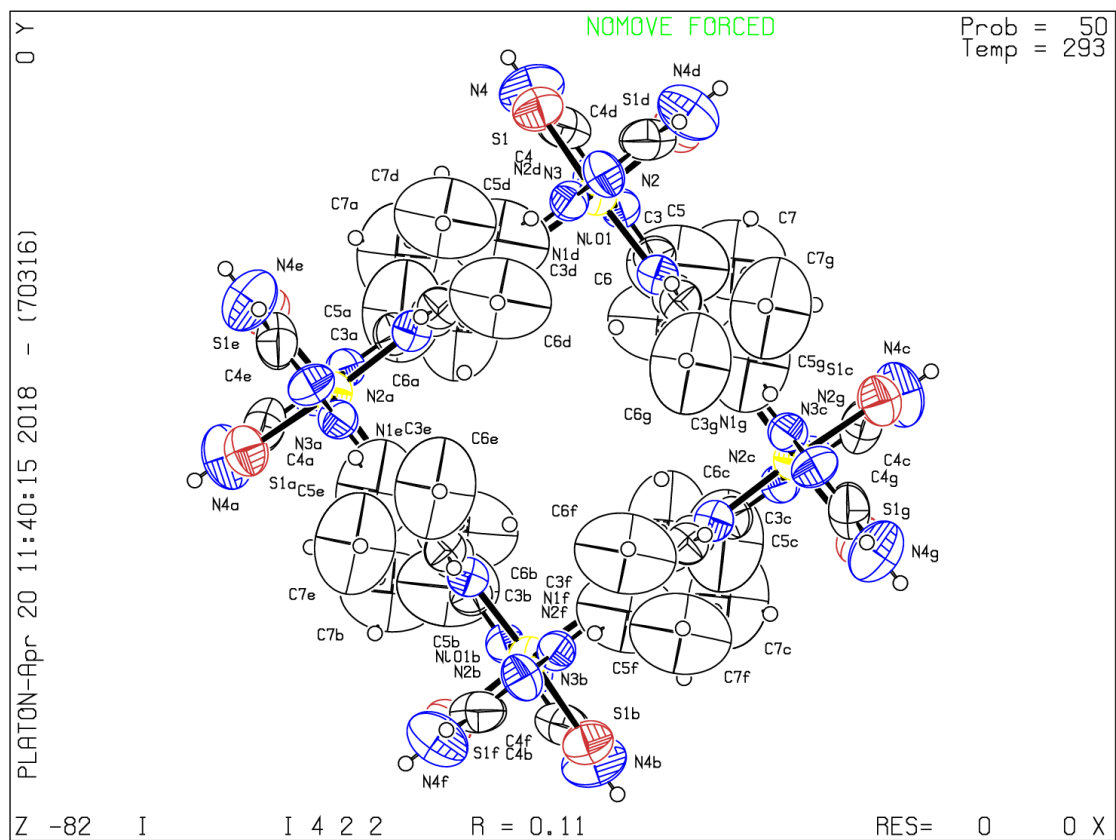

Supplement: s1 [file s1]
