# Supplementary material
Source: MDPI journal article supplement (https://www.mdpi.com/2304-6740/6/2/51)

# checkCIF/PLATON report

Structure factors have been supplied for datablock(s) I

THIS REPORT IS FOR GUIDANCE ONLY. IF USED AS PART OF A REVIEW PROCEDURE FOR PUBLICATION, IT SHOULD NOT REPLACE THE EXPERTISE OF AN EXPERIENCED CRYSTALLOGRAPHIC REFEREE.

No syntax errors found.      CIF dictionary      Interpreting this report

## Datablock: I

---

Bond precision:    C-C = 0.0375 A                      Wavelength=0.71073

Cell:                      a=19.780(1)              b=19.780(1)              c=20.291(1)  
                                alpha=90              beta=90              gamma=90  
Temperature:              170 K

|                | Calculated                  | Reported           |
|----------------|-----------------------------|--------------------|
| Volume         | 7938.8(9)                   | 7938.8(9)          |
| Space group    | I 4 2 2                     | I 4 2 2            |
| Hall group     | I 4 2                       | I 4 2              |
| Moiety formula | C48 H56 N32 S8 Zn4, 8(C H3) | C56 H80 N32 S8 Zn4 |
| Sum formula    | C56 H80 N32 S8 Zn4          | C56 H80 N32 S8 Zn4 |
| Mr             | 1719.56                     | 1719.48            |
| Dx, g cm-3     | 0.719                       | 0.719              |
| Z              | 2                           | 2                  |
| Mu (mm-1)      | 0.731                       | 0.731              |
| F000           | 1776.0                      | 1776.0             |
| F000'          | 1780.52                     |                    |
| h,k,lmax       | 25,25,25                    | 25,25,25           |
| Nref           | 4292[ 2423]                 | 4242               |
| Tmin,Tmax      | 0.803,0.803                 | 0.693,0.901        |
| Tmin'          | 0.803                       |                    |

Correction method= # Reported T Limits: Tmin=0.693 Tmax=0.901  
AbsCorr = NUMERICAL

Data completeness= 1.75/0.99                      Theta(max)= 26.873

R(reflections)= 0.1616( 1360)                      wR2(reflections)= 0.4359( 4242)

S = 1.145                      Npar= 104

---

The following ALERTS were generated. Each ALERT has the format

**test-name\_ALERT\_alert-type\_alert-level.**

Click on the hyperlinks for more details of the test.

---

[IMAGE] **Alert level A**

PLAT602\_ALERT\_2\_A VERY LARGE Solvent Accessible VOID(S) in Structure ! Info

---

[IMAGE] **Alert level B**

PLAT026\_ALERT\_3\_B Ratio Observed / Unique Reflections (too) Low .. 32% Check  
PLAT031\_ALERT\_4\_B Refined Extinction Parameter Within Range ..... 2.273 Sigma  
PLAT049\_ALERT\_1\_B Calculated Density Less Than 1.0 gcm-3 ..... 0.7194 Check  
PLAT082\_ALERT\_2\_B High R1 Value ..... 0.16 Report  
PLAT084\_ALERT\_3\_B High wR2 Value (i.e. > 0.25) ..... 0.44 Report  
PLAT234\_ALERT\_4\_B Large Hirshfeld Difference C3 --C10 0.28 Ang.  
PLAT241\_ALERT\_2\_B High 'MainMol' Ueq as Compared to Neighbors of C10 Check  
PLAT341\_ALERT\_3\_B Low Bond Precision on C-C Bonds ..... 0.0375 Ang.  
PLAT413\_ALERT\_2\_B Short Inter XH3 .. XHn H1 ..H12B 1.92 Ang.  
PLAT930\_ALERT\_2\_B Check Twin Law ( 1-1 -1 ) [ 1-1 -1 ] Estimated BASF 0.47

---

[IMAGE] **Alert level C**

CRYSC01\_ALERT\_1\_C The word below has not been recognised as a standard identifier.  
rot  
CRYSC01\_ALERT\_1\_C No recognised colour has been given for crystal colour.  
RINTA01\_ALERT\_3\_C The value of Rint is greater than 0.12  
Rint given 0.139  
STRVA01\_ALERT\_4\_C Flack test results are ambiguous.  
From the CIF: \_refine\_ls\_abs\_structure\_Flack 0.600  
From the CIF: \_refine\_ls\_abs\_structure\_Flack\_su 0.110  
PLAT020\_ALERT\_3\_C The Value of Rint is Greater Than 0.12 ..... 0.139 Report  
PLAT094\_ALERT\_2\_C Ratio of Maximum / Minimum Residual Density .... 2.01 Report  
PLAT234\_ALERT\_4\_C Large Hirshfeld Difference N1 --C2 0.24 Ang.  
PLAT234\_ALERT\_4\_C Large Hirshfeld Difference N2 --N3 0.18 Ang.  
PLAT234\_ALERT\_4\_C Large Hirshfeld Difference N3 --C4 0.22 Ang.  
PLAT241\_ALERT\_2\_C High 'MainMol' Ueq as Compared to Neighbors of S1 Check  
PLAT242\_ALERT\_2\_C Low 'MainMol' Ueq as Compared to Neighbors of C2 Check  
PLAT242\_ALERT\_2\_C Low 'MainMol' Ueq as Compared to Neighbors of C3 Check  
PLAT242\_ALERT\_2\_C Low 'MainMol' Ueq as Compared to Neighbors of C4 Check  
PLAT250\_ALERT\_2\_C Large U3/U1 Ratio for Average U(i,j) Tensor .... 2.4 Note  
PLAT420\_ALERT\_2\_C D-H Without Acceptor N4 --H4A Please Check  
PLAT420\_ALERT\_2\_C D-H Without Acceptor N4 --H4B Please Check  
PLAT906\_ALERT\_3\_C Large K Value in the Analysis of Variance ..... 10.797 Check  
PLAT906\_ALERT\_3\_C Large K Value in the Analysis of Variance ..... 3.304 Check  
PLAT906\_ALERT\_3\_C Large K Value in the Analysis of Variance ..... 2.330 Check  
PLAT906\_ALERT\_3\_C Large K Value in the Analysis of Variance ..... 2.156 Check  
PLAT907\_ALERT\_2\_C Flack x > 0.5, Structure Needs to be Inverted? . 0.60 Check  
PLAT911\_ALERT\_3\_C Missing FCF Refl Between Thmin & STh/L= 0.600 4 Report  
PLAT918\_ALERT\_3\_C Reflection(s) with I(obs) much Smaller I(calc) . 4 Check

---

[IMAGE] **Alert level G**

PLAT003\_ALERT\_2\_G Number of Uiso or Uij Restrained non-H Atoms ... 3 Report  
PLAT007\_ALERT\_5\_G Number of Unrefined Donor-H Atoms ..... 2 Report  
PLAT033\_ALERT\_4\_G Flack x Value Deviates > 3.0 \* sigma from Zero . 0.600 Note  
PLAT042\_ALERT\_1\_G Calc. and Reported MoietyFormula Strings Differ Please Check  
PLAT072\_ALERT\_2\_G SHELXL First Parameter in WGHT Unusually Large 0.20 Report  
PLAT171\_ALERT\_4\_G The CIF-Embedded .res File Contains EADP Records 1 Report  
PLAT186\_ALERT\_4\_G The CIF-Embedded .res File Contains ISOR Records 1 Report

|                   |                                                  |                |      |        |
|-------------------|--------------------------------------------------|----------------|------|--------|
| PLAT300_ALERT_4_G | Atom Site Occupancy of H11A                      | Constrained at | 0.5  | Check  |
| PLAT300_ALERT_4_G | Atom Site Occupancy of H11B                      | Constrained at | 0.5  | Check  |
| PLAT300_ALERT_4_G | Atom Site Occupancy of H11C                      | Constrained at | 0.5  | Check  |
| PLAT300_ALERT_4_G | Atom Site Occupancy of H11D                      | Constrained at | 0.5  | Check  |
| PLAT300_ALERT_4_G | Atom Site Occupancy of H11E                      | Constrained at | 0.5  | Check  |
| PLAT300_ALERT_4_G | Atom Site Occupancy of H11F                      | Constrained at | 0.5  | Check  |
| PLAT300_ALERT_4_G | Atom Site Occupancy of H12A                      | Constrained at | 0.5  | Check  |
| PLAT300_ALERT_4_G | Atom Site Occupancy of H12B                      | Constrained at | 0.5  | Check  |
| PLAT300_ALERT_4_G | Atom Site Occupancy of H12C                      | Constrained at | 0.5  | Check  |
| PLAT300_ALERT_4_G | Atom Site Occupancy of H12D                      | Constrained at | 0.5  | Check  |
| PLAT300_ALERT_4_G | Atom Site Occupancy of H12E                      | Constrained at | 0.5  | Check  |
| PLAT300_ALERT_4_G | Atom Site Occupancy of H12F                      | Constrained at | 0.5  | Check  |
| PLAT343_ALERT_2_G | Unusual sp? Angle Range in Main Residue for      |                | C10  | Check  |
| PLAT367_ALERT_2_G | Long? C(sp?)-C(sp?) Bond C3 - C10                | .              | 1.65 | Ang.   |
| PLAT367_ALERT_2_G | Long? C(sp?)-C(sp?) Bond C10 - C11               | .              | 1.60 | Ang.   |
| PLAT432_ALERT_2_G | Short Inter X...Y Contact C1 ..C12               |                | 3.06 | Ang.   |
| PLAT432_ALERT_2_G | Short Inter X...Y Contact C2 ..C12               |                | 2.94 | Ang.   |
| PLAT432_ALERT_2_G | Short Inter X...Y Contact C3 ..C12               |                | 2.27 | Ang.   |
| PLAT432_ALERT_2_G | Short Inter X...Y Contact C10 ..C12              |                | 1.84 | Ang.   |
| PLAT722_ALERT_1_G | Angle Calc 140.00, Rep 141.10 Dev...             |                | 1.10 | Degree |
|                   | H12A -C12 -H12D 1.555 1.555 1.555                | #              | 47   | Check  |
| PLAT722_ALERT_1_G | Angle Calc 140.00, Rep 141.10 Dev...             |                | 1.10 | Degree |
|                   | H12B -C12 -H12E 1.555 1.555 1.555                | #              | 52   | Check  |
| PLAT722_ALERT_1_G | Angle Calc 140.00, Rep 141.10 Dev...             |                | 1.10 | Degree |
|                   | H12C -C12 -H12F 1.555 1.555 1.555                | #              | 58   | Check  |
| PLAT764_ALERT_4_G | Overcomplete CIF Bond List Detected (Rep/Expd)   | .              | 1.12 | Ratio  |
| PLAT773_ALERT_2_G | Check long C-C Bond in CIF: C10 --C12            |                | 1.84 | Ang.   |
| PLAT860_ALERT_3_G | Number of Least-Squares Restraints .....         |                | 18   | Note   |
| PLAT870_ALERT_4_G | ALERTS Related to Twinning Effects Suppressed .. |                | !    | Info   |
| PLAT910_ALERT_3_G | Missing # of FCF Reflection(s) Below Theta(Min). |                | 2    | Note   |
| PLAT912_ALERT_4_G | Missing # of FCF Reflections Above STh/L= 0.600  |                | 20   | Note   |
| PLAT913_ALERT_3_G | Missing # of Very Strong Reflections in FCF .... |                | 1    | Note   |
| PLAT931_ALERT_5_G | Found Twin Law ( ) [ 1 -1 -1 ] Est. BASF         |                | 0.48 | Check  |
| PLAT933_ALERT_2_G | Number of OMIT Records in Embedded .res File ... |                | 4    | Note   |

---

1 **ALERT level A** = Most likely a serious problem - resolve or explain  
10 **ALERT level B** = A potentially serious problem, consider carefully  
23 **ALERT level C** = Check. Ensure it is not caused by an omission or oversight  
38 **ALERT level G** = General information/check it is not something unexpected

7 ALERT type 1 CIF construction/syntax error, inconsistent or missing data  
25 ALERT type 2 Indicator that the structure model may be wrong or deficient  
14 ALERT type 3 Indicator that the structure quality may be low  
24 ALERT type 4 Improvement, methodology, query or suggestion  
2 ALERT type 5 Informative message, check

---

## checkCIF publication errors

---

### [IMAGE] Alert level A

PUBL006\_ALERT\_1\_A \_publ\_requested\_journal is missing  
e.g. 'Acta Crystallographica Section C'  
PUBL008\_ALERT\_1\_A \_publ\_sectiontitle is missing. Title of paper.  
PUBL012\_ALERT\_1\_A \_publ\_section\_abstract is missing.  
Abstract of paper in English.

---

### [IMAGE] Alert level G

PUBL017\_ALERT\_1\_G The \_publ\_section\_references section is missing or empty.

---

3 **ALERT level A** = Data missing that is essential or data in wrong format  
1 **ALERT level G** = General alerts. Data that may be required is missing

---

## Publication of your CIF

You should attempt to resolve as many as possible of the alerts in all categories. Often the minor alerts point to easily fixed oversights, errors and omissions in your CIF or refinement strategy, so attention to these fine details can be worthwhile. In order to resolve some of the more serious problems it may be necessary to carry out additional measurements or structure refinements. However, the nature of your study may justify the reported deviations from journal submission requirements and the more serious of these should be commented upon in the discussion or experimental section of a paper or in the "special\_details" fields of the CIF. *checkCIF* was carefully designed to identify outliers and unusual parameters, but every test has its limitations and alerts that are not important in a particular case may appear. Conversely, the absence of alerts does not guarantee there are no aspects of the results needing attention. It is up to the individual to critically assess their own results and, if necessary, seek expert advice.

If level A alerts remain, which you believe to be justified deviations, and you intend to submit this CIF for publication in a journal, you should additionally insert an explanation in your CIF using the Validation Reply Form (VRF) below. This will allow your explanation to be considered as part of the review process.

## Validation response form

Please find below a validation response form (VRF) that can be filled in and pasted into your CIF.

```
# start Validation Reply Form
_vrf_PUBL006_GLOBAL
;
PROBLEM: _publ_requested_journal is missing
RESPONSE: ...
;
_vrf_PUBL008_GLOBAL
;
PROBLEM: _publ_section_title is missing. Title of paper.
RESPONSE: ...
;
_vrf_PUBL012_GLOBAL
;
PROBLEM: _publ_section_abstract is missing.
RESPONSE: ...
;
_vrf_PLAT602_I
;
PROBLEM: VERY LARGE Solvent Accessible VOID(S) in Structure      ! Info
RESPONSE: ...
;
# end Validation Reply Form
```

If you wish to submit your CIF for publication in Acta Crystallographica Section C or E, you should upload your CIF via the web. If you wish to submit your CIF for publication in IUCrData you should upload your CIF via the web. If your CIF is to form part of a submission to another IUCr journal, you will be asked, either during electronic submission or by the Co-editor handling your paper, to upload your CIF via our web site.

**PLATON version of 30/01/2018; check.def file version of 30/01/2018**

Datablock I - ellipsoid plot

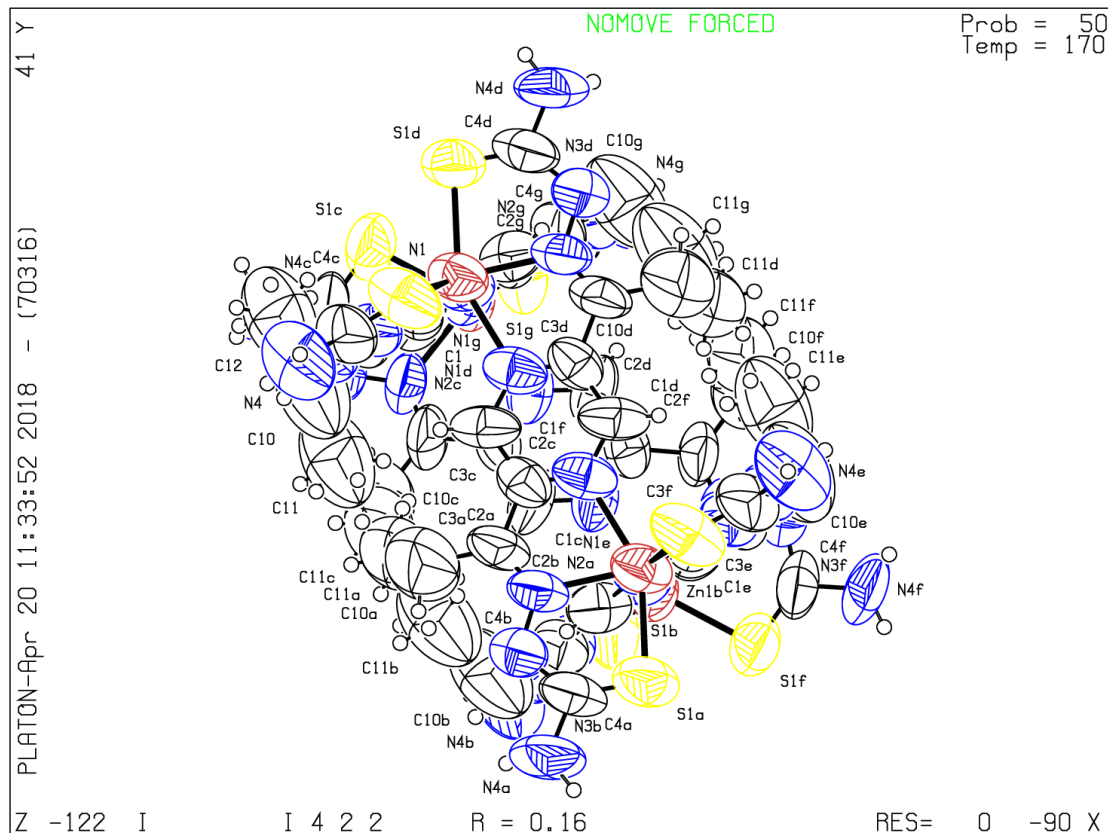

Supplement: s1 [file s1]
