# Supplementary material
Source: MDPI journal article supplement (https://www.mdpi.com/2304-6740/6/2/51)
Supplement: s1 [file s1]

## Supplementary Materials

### [2 × 2] Molecular Grids of Ni(II) and Zn(II) with Redox-Active 1,4-Pyrazine-Bis(thiosemicarbazone) Ligands

Natalia Arefyeva, Aaron Sandleben, Alexander Krest, Ulrich Baumann, Mathias Schäfer, Maxim Kempf, Axel Klein\*

Contents:

A) Experimental Section

B) Supporting Figures

C) Supporting Tables

**Figure S1.**  $^1\text{H}$  NMR spectrum of  $\text{H}_2\text{L}^{\text{Me}}$  in  $\text{DMSO-d}_6$ .

**Figure S2.**  $^{13}\text{C}$  NMR APT spectrum of  $\text{H}_2\text{L}^{\text{Me}}$  in  $\text{DMSO-d}_6$ .

**Figure S3.**  $^1\text{H}$  NMR spectrum of  $\text{H}_2\text{L}^{\text{Et}}$  in  $\text{DMSO-d}_6$ .

**Figure S4.**  $^{15}\text{N}$  NMR HMBC spectrum of  $\text{H}_2\text{L}^{\text{Et}}$  in  $\text{DMSO-d}_6$ .

**Figure S5.**  $^1\text{H}$  NMR spectrum of  $\text{H}_2\text{L}^{\text{iPr}}$  in  $\text{DMSO-d}_6$ .

**Figure S6.**  $^1\text{H}$  NMR spectrum of  $\text{H}_2\text{L}^{\text{Ph}}$  in  $\text{DMSO-d}_6$ .

**Figure S7.**  $^1\text{H}$  NMR spectrum of  $[\text{Zn}_4(\text{L}^{\text{Ph}})_4]$  in acetone- $\text{d}_6$  with NS = 1024 und  $D_1 = 2$  s.

**Figure S8.** IR spectra of  $\text{H}_2\text{L}^{\text{R}}$ .

**Figure S9.** IR spectra of  $[\text{Ni}_4(\text{L}^{\text{R}})_4]$ .

**Figure S10.** IR spectra of  $[\text{Zn}_4(\text{L}^{\text{R}})_4]$ .

**Figure S11.** ESI MS(+) of  $[\text{Ni}_4(\text{L}^{\text{Me}})_4]$ .

**Figure S12.** ESI MS(+) of  $[\text{Ni}_4(\text{L}^{\text{Et}})_4]$ .

**Figure S13.** ESI MS(+) of  $[\text{Ni}_4(\text{L}^{\text{Ph}})_4]$ .

**Figure S14.** ESI MS(+) of  $[\text{Zn}_4(\text{L}^{\text{Et}})_4]$ .

**Figure S15.** ESI MS(+) of  $[\text{Zn}_4(\text{L}^{\text{iPr}})_4]$ .

**Figure S16.** TG-DTA of  $[\text{Zn}_4(\text{L}^{\text{iPr}})_4] \cdot 4\text{H}_2\text{O}$ .

**Figure S17.** TG-DTA of  $[\text{Ni}_4(\text{L}^{\text{iPr}})_4] \cdot 4\text{H}_2\text{O}$ .

**Figure S18.** TG-DTA of  $[\text{Ni}_4(\text{L}^{\text{Ph}})_4] \cdot 2\text{DMA} \cdot 4\text{H}_2\text{O}$ .

**Figure S19.** Crystal and molecular structure of  $[\text{Ni}_4(\text{L}^{\text{iPr}})_4]$  at 293(2) K, solved in *I*422.

**Figure S20.** Crystal and molecular structure of  $[\text{Ni}_4(\text{L}^{\text{Me}})_4]$  at 293(2) K, solved in *I*422.

**Figure S21.** ORTEP plots of the binuclear coordination units of  $[\text{Ni}_4(\text{L}^{\text{Me}})_4]$  at 293(2) K, solved in *I*422 (left) and  $[\text{Ni}_4(\text{L}^{\text{Me}})_4] \cdot \text{H}_2\text{O}$  at 170(2) K, solved in *P*4nc (right).

**Figure S22.** Crystal structures of  $[\text{Ni}_4(\text{L}^{\text{Me}})_4]$  at 293(2) K in *I*422 (left) and  $[\text{Ni}_4(\text{L}^{\text{Me}})_4] \cdot \text{H}_2\text{O}$  at 170(2) K in *P*4nc (right) both viewed along the crystallographic *c* axis.

**Figure S23.** Crystal structure of  $[\text{Ni}_4(\text{L}^{\text{Me}})_4] \cdot \text{H}_2\text{O}$  at 170(2) K, solved in *P*4nc.

**Figure S24.** Crystal and molecular structure of  $[\text{Ni}_4(\text{L}^{\text{Et}})_4] \cdot \text{H}_2\text{O}$  at 293(2) K.

**Figure S25.** Crystal and molecular structure of  $[\text{Ni}_4(\text{L}^{\text{iPr}})_4]$  at 293(2) K.

**Figure S26.** Crystal structures of  $[\text{Zn}_4(\text{L}^{\text{iPr}})_4]$  at 170(2) K in *I*422 (left) and  $[\text{Zn}_4(\text{L}^{\text{Ph}})_4]$  (right) at 293(2) K.

**Figure S27.** Crystal and molecular structure of  $[\text{Zn}_4(\text{L}^{\text{iPr}})_4]$  at 170(2) K.

**Figure S28.** Crystal and molecular structure of  $[\text{Zn}_4(\text{L}^{\text{Ph}})_4]$  at 170(2) K.

**Figure S29.** UV-vis absorption spectra of ligands  $\text{H}_2\text{L}^{\text{R}}$  in THF.

**Figure S30.** UV-vis absorption spectra of  $[\text{Zn}_4(\text{L}^{\text{R}})_4]$  in THF.

**Figure S31.** UV-vis absorption spectra of  $[\text{Ni}_4(\text{L}^{\text{R}})_4]$  in THF.

**Figure S32.** UV-vis absorption spectra of  $[\text{Zn}_4(\text{L}^{\text{iPr}})_4]$  during addition glacial acetic acid.

**Figure S33.** Cyclic voltammograms (CVs) of  $\text{H}_2\text{L}^{\text{Me}}$  in 0.1 M  $n\text{Bu}_4\text{NPF}_6/\text{THF}$  solution.  
**Figure S34.** Cyclic voltammograms of  $\text{H}_2\text{L}^{\text{Et}}$  in 0.1 M  $n\text{Bu}_4\text{NPF}_6/\text{THF}$  solution.  
**Figure S35.** Cyclic voltammograms of  $\text{H}_2\text{L}^{\text{Ph}}$  in 0.1 M  $n\text{Bu}_4\text{NPF}_6/\text{THF}$  solution.  
**Figure S36.** Cyclic voltammograms of  $[\text{Ni}_4(\text{L}^{\text{Et}})_4]$  in 0.1 M  $n\text{Bu}_4\text{NPF}_6/\text{THF}$  solution.  
**Figure S37.** CVs and SQWs of  $[\text{Ni}_4(\text{L}^{\text{Ph}})_4]$  in 0.1 M  $n\text{Bu}_4\text{NPF}_6/\text{THF}$  solution.  
**Figure S38.** CVs of  $[\text{Zn}_4(\text{L}^{\text{Ph}})_4]$  in 0.1 M of  $n\text{Bu}_4\text{NPF}_6/\text{THF}$  solution.  
**Figure S39.** UV-vis spectroelectrochemical reduction of  $[\text{Zn}_4(\text{L}^{\text{iPr}})_4]$  in  $\text{THF}/n\text{Bu}_4\text{NPF}_6$  solutions.  
**Figure S40.** X-band EPR spectrum during cathodic reduction of  $[\text{Ni}_4(\text{L}^{\text{iPr}})_4]$  in  $\text{THF}/n\text{Bu}_4\text{NPF}_6$  solution.

**Table S1.** Selected crystallographic and structure refinement data for  $[\text{M}_4(\text{L}^{\text{R}})_4]$  ( $\text{M} = \text{Ni}$  or  $\text{Zn}$ )  
**Table S2.** Selected bond lengths /Å and bond angles /° of Ni complexes.  
**Table S3.** Selected bond lengths /Å and bond angles /° of Zn complexes.  
**Table S4.** Absorption maxima of the  $\text{H}_2\text{L}^{\text{R}}$  ligands and the Zn and Ni complexes.<sup>a</sup>  
**Table S5.** Selected DFT-calculated and experimental bond lengths /Å and bond angles /° of Zn complexes.  
**Table S6.** Selected DFT-calculated and experimental bond lengths /Å and bond angles /° of Ni complexes.  
**Tables S7-S13.** Atom coordinates of calculated molecule structures of complexes  $[\text{M}_4(\text{L}^{\text{R}})_4]$  ( $\text{M} = \text{Ni}$  or  $\text{Zn}$ ).

## A) Experimental Section

**Materials.** Thiosemicarbazine was purchased from Acros Organics. All commercially available reagents were used without further purification. Solvents (THF, toluene, diethyl ether and  $\text{CH}_3\text{CN}$ ) were dried using a MBRAUN MB SPS-800 solvent purification system.

**Synthesis of the pyrazine-2,5-carbaldehydes ( $\text{R} = \text{Me, Et, iPr, Ph}$ ) - General procedure:** Derived from a literature procedure,<sup>1</sup> we prepared an ice-cooled solution of 0.8 g (10 mmol) 1,4-pyrazine and the corresponding aldehyde (60 mmol) in 15 mL water and added 15 mL acetic acid and 3 mL of conc. sulfuric acid. To this mixture, 3.87 mL of a solution of *t*-butyl hydroperoxide (70% solution in  $\text{H}_2\text{O}$ ) (40 mmol) and a solution of 5.56 g iron(II)sulfate (20 mmol) in 20 mL water were added simultaneously and dropwise. After stirring for 1 h the dark brown reaction mixture was filtered and the thus obtained yellow products were recrystallized from ethanol. **Important:** These syntheses require a lot of experience concerning the temperature, the sequence of adding the reagents, and even the polarity of the reaction mixture.

**2,5-diacetylpyrazine:** Yellow solid. Yield: 0.56 g (34%). Anal. Calc. for  $\text{C}_8\text{H}_8\text{N}_2\text{O}_2$ : C, 58.53; H, 4.91; N, 17.06. Found: C, 58.63; H, 4.70; N, 17.02%. MS ( $\text{EI}^+$  20eV,  $m/z$ ): 164 $[\text{M}]^+$ , 149.  $^1\text{H}$  NMR, (300 MHz,  $\text{DMSO-d}_6$ ): 9.3 (s, 2H,  $\text{H}_{\text{pz}}$ ), 2.8 (s, 6H,  $\text{H}_{\text{Me}}$ ) ppm.

**2,5-dipropionylpyrazine:** Yellow solid. Yield: 0.59 g (35 %). Anal. Calc. for  $\text{C}_{10}\text{H}_{12}\text{N}_2\text{O}_2$ : C, 62.49; H, 6.29; N, 14.57. Found: C, 62.58; H, 8.62; N, 14.55%. MS ( $\text{EI}^+$  20eV,  $m/z$ ): 192 $[\text{M}]^+$ .  $^1\text{H}$  NMR, (300 MHz,  $\text{DMSO-d}_6$ ): 9.19 (s, 2H,  $\text{H}_{\text{pz}}$ ), 3.24-3.17 (q, 4H,  $\text{H}_{\text{CH}_2}$ ), 1.14-1.09 (t, 6H,  $\text{H}_{\text{Me}}$ ) ppm.

**2,5-diisobutanylpyrazin:** Yellow solid. Yield: 0.77 g (35%). Anal. Calc. for  $\text{C}_{12}\text{H}_{16}\text{N}_2\text{O}_2$ : C, 65.43; H, 7.32; N, 12.72; Found: C, 64.38; H, 6.67; N, 12.61%. MS ( $\text{EI}^+$  20eV,  $m/z$ ): 220 $[\text{M}]^+$ .  $^1\text{H}$  NMR, (300 MHz, acetone- $\text{d}_6$ ): 9.19 (s, 2H,  $\text{H}_{\text{pz}}$ ), 4.05-3.96 (m, 2H,  $\text{H}_{\text{CH}}$ ), 1.20-1.18 (d, 12H,  $\text{H}_{\text{Me}}$ ) ppm.

**2,5-dibenzoylpyrazin:** Yellow solid. Yield: 1.30 g (45%). Anal. Calc. for  $\text{C}_{18}\text{H}_{12}\text{N}_2\text{O}_2$ : C, 74.99; H, 4.20; N, 9.72; Found: N, C, 74.97; H, 4.04; 9.64%. MS ( $\text{EI}^+$  20eV,  $m/z$ ): 288 $[\text{M}]^+$ .  $^1\text{H}$  NMR, (300 MHz,

DMSO- $d_6$ ): 9.26 (s, 2H,  $H_{pz}$ ), 8.06-8.03 (d, 4H,  $H_{Ph1/Ph5}$ ), 7.78-7.73 (t, 2H,  $H_{Ph3}$ ), 7.63-7.58 (t, 4H,  $H_{Ph2/Ph4}$ ) ppm.

**Synthesis of the bis(thiosemicarbazone) ligands - General procedure:** A solution of the pyrazine-2,5-carbaldehyde (1.0 mmol) in toluene was heated to 105 °C. To this solution was added 0.21 g (2.3 mmol) thiosemicarbazide dissolved in hot water and the reaction mixture was acidified with glacial acetic acid. The mixture was stirred at 105 °C for 5-24 h and the product precipitated as a yellow solid. The solid was vacuum filtered and washed with hot water, ethanol and then dried.

**$H_2L^{Me}$ :** Yellow solid. Yield: 0.28 g (90%). Anal. Calc. for  $C_{10}H_{14}N_8S_2$ : C, 38.69; H, 4.55; N, 36.10; S, 20.66. Found: C, 39.03; H, 4.35; N, 36.47; S, 19.55%. MS (EI+ 20eV,  $m/z$ ): 310[M]<sup>+</sup>. <sup>1</sup>H NMR (600 MHz, DMSO- $d_6$ ): 10.50 (s, 2H, -NH), 9.60 (s, 2H,  $H_{pz}$ ), 8.47 (s, 2H, -NH<sub>a</sub>), 8.30 (s, 2H, -NH<sub>b</sub>), 2.39 (s, 6H, H<sub>4</sub>) ppm. <sup>13</sup>C NMR (150.9 MHz, DMSO- $d_6$ )  $\delta$  [ppm]: 179.2 (C<sub>4</sub>), 148.9 (C<sub>2</sub>), 146.1 (C<sub>3</sub>), 141.2 (C<sub>1</sub>), 11.9 (C<sub>Me</sub>). <sup>15</sup>N NMR (60.83 MHz, DMSO- $d_6$ )  $\delta$  [ppm]: 325 (N<sub>1</sub>), 319 (N<sub>2</sub>) 168 (N<sub>3</sub>), 113 (N<sub>4</sub>); FT-IR: [cm<sup>-1</sup>] = 3404 m, 3282 m, 3168 m, 2965 w, 1597 s, 1504 m, 1477 m, 1455 s, 1368 s, 1294 m, 1277 s, 1201 m, 1180 m, 1128 w, 1094 s, 1050 w, 1029 s, 960 m, 908 s, 850 s, 722 s, 613 s, 577 w, 494 s. UV-Vis (THF)  $\lambda_{max}$  [nm]: 389sh, 372, 277, 253.

**$H_2L^{Et}$ :** Yellow solid. Yield: 0.21 g (63%). Anal. Calc. for  $C_{12}H_{18}N_8S_2$ : C, 42.58; H, 5.36; N, 33.11; S, 18.95. Found: C, 43.26; H, 5.59; N, 33.59; S, 18.91%. MS(EI+ 20eV,  $m/z$ ): 338[M]<sup>+</sup>. <sup>1</sup>H NMR (600 MHz, DMSO- $d_6$ )  $\delta$  [ppm]: 10.66 (s, 2H, NH), 9.57 (s, 2H,  $H_{pz}$ ), 8.43 (s, 2H, NH<sub>2b</sub>), 8.26 (s, 2H, NH<sub>2a</sub>), 3.07-3.00 (q, 4H, H<sub>CH2</sub>), 1.04-1.00 (t, 6H, H<sub>Me</sub>). <sup>15</sup>N NMR (60.83 MHz, DMSO- $d_6$ )  $\delta$  [ppm]: 325 (N<sub>1</sub>), 315 (N<sub>2</sub>) 167 (N<sub>3</sub>), 112 (N<sub>4</sub>); FT-IR: [cm<sup>-1</sup>] = 3418 m, 3225 m, 3145 m, 2980 w, 2938 w, 2871 w, 1597 s, 1500 s, 1448 s, 1372 m, 1278 s, 1243 m, 1183 m, 1095 s, 1052 s, 1025 m, 922 s, 858 s, 786 m, 708 m, 666 w, 579 s, 470 s. UV-Vis (THF)  $\lambda_{max}$  [nm]: 372, 277, 230sh.

**$H_2L^{iPr}$ :** Yellow solid. Yield: 0.23 g (69%); Anal. Calc. for  $C_{14}H_{22}N_8S_2$ : C, 45.88; H, 6.05; N, 30.57; S, 17.50. Found: C, 46.25; H, 6.34; N, 29.80; S, 18.28%; MS(EI+ 20eV,  $m/z$ ): 366[M]<sup>+</sup>. <sup>1</sup>H NMR (600 MHz, DMSO- $d_6$ )  $\delta$  [ppm]: 12.56 (s, 2H, NH), 9.17 (s, 2H,  $H_{pz}$ ), 8.59 (s, 2H, NH<sub>2b</sub>), 7.87 (s, 2H, NH<sub>2a</sub>), 3.40-3.35 (m, 4H, H<sub>CH</sub>), 1.21-1.20 (d, 12H, H<sub>Me</sub>); FT-IR: 3410 m, 3232 m, 3145 m, 2963 w, 2925 w, 2864 w, 1600 s, 1576 m, 1435 s, 1386 w, 1322 s, 1259 w, 1200 w, 1175 m, 1120 s, 1055 s, 1006 s, 911 m, 874 w, 838 s, 731 m, 656 m, 619 s, 568 s, 521 s, 499 s, 418 s cm<sup>-1</sup>. UV-Vis (THF)  $\lambda_{max}$  [nm]: 421, 311, 258.

**$H_2L^{Ph}$ :** Brown solid. Yield: 0.36 g (83%); Anal. Calc. for  $C_{20}H_{18}N_8O_2$ : C, 55.28; H, 4.18; N, 25.79; S, 14.76. Found: C, 54.65; H, 3.66; N, 25.49; S, 14.84%; MS(EI+ 20eV,  $m/z$ ): 434[M]<sup>+</sup>. <sup>1</sup>H NMR (600 MHz, DMSO- $d_6$ )  $\delta$  [ppm]: 11.37 (s, 2H, NH), 8.88 (s, 2H,  $H_{pz}$ ), 8.56 (s, 2H, NH<sub>2b</sub>), 8.25 (s, 2H, NH<sub>2a</sub>), 7.79 (m, 4H,  $H_{Ph}$ ), 7.47 (m, 6H,  $H_{Ph}$ ); FT-IR: [cm<sup>-1</sup>] = 1596 s, 1551 w, 1456 s, 1328 m, 1265 m, 1220 m, 1172 m, 1094 s, 1050 s, 1023 s, 943 m, 912 m, 845 s, 773 s, 734 m, 703 s, 689 w, 661 m, 637 w, 619 m, 532 s, 493 m, 426 s, 412 s. UV-Vis (THF)  $\lambda_{max}$  [nm]: 422sh, 406, 363, 289, 251.

(1) T. Caronna and G. Fronza, *J. Chem. Soc.* **1972**, 2035–3038.

## B) Supporting Figures

(Figures S1–S37)

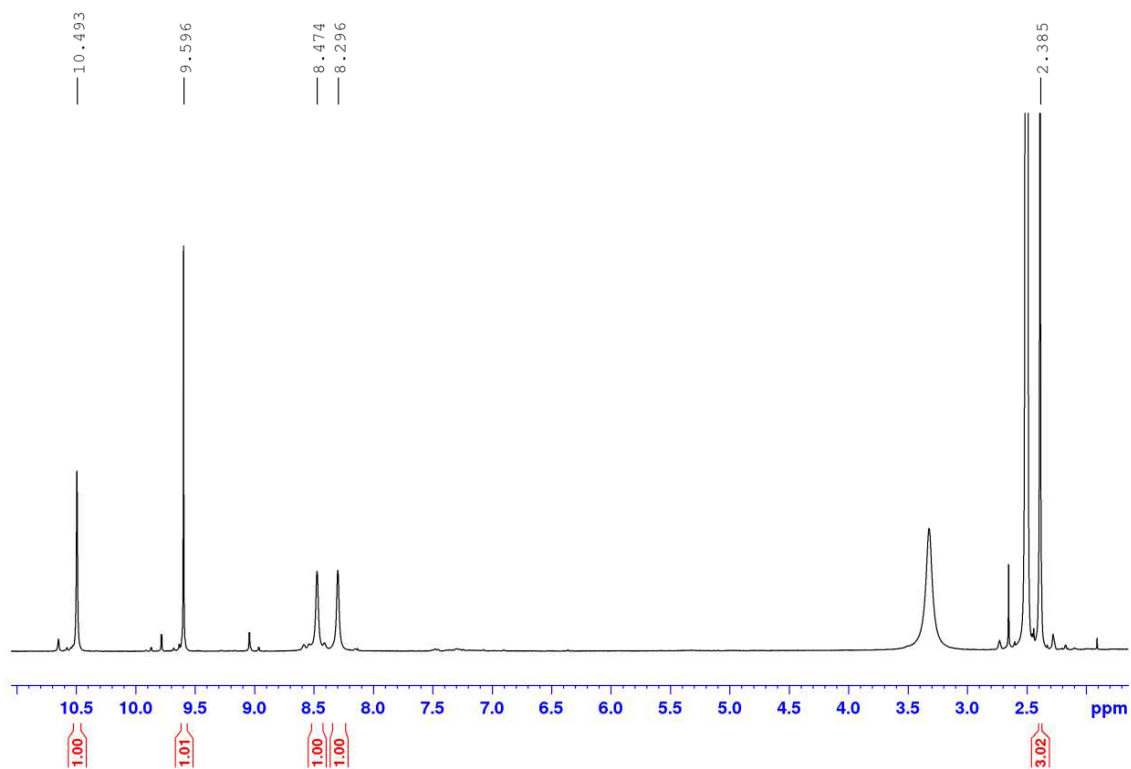

**Figure S1.** <sup>1</sup>H NMR spectrum of H<sub>2</sub>L<sup>Me</sup> in DMSO-d<sub>6</sub>.

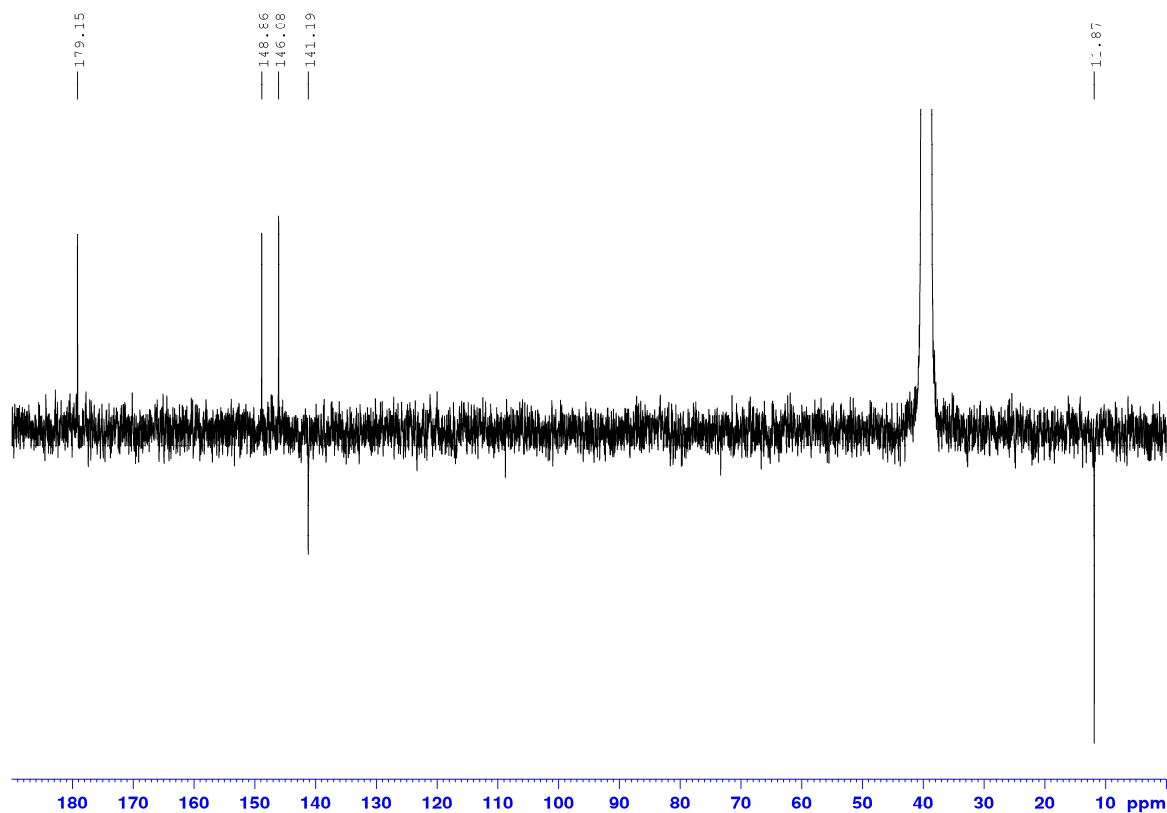

**Figure S2.** <sup>13</sup>C NMR APT spectrum of H<sub>2</sub>L<sup>Me</sup> in DMSO-d<sub>6</sub>.

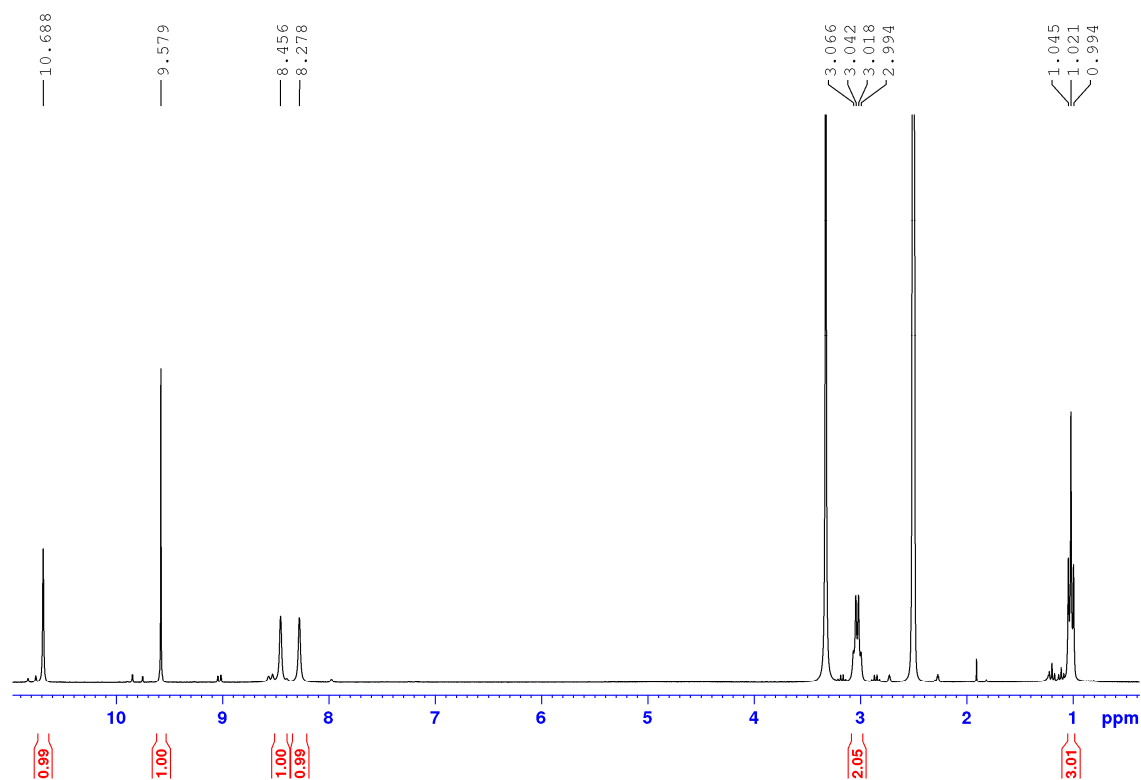

**Figure S3.**  $^1\text{H}$  NMR spectrum of  $\text{H}_2\text{L}^{\text{Et}}$  in  $\text{DMSO-d}_6$ .

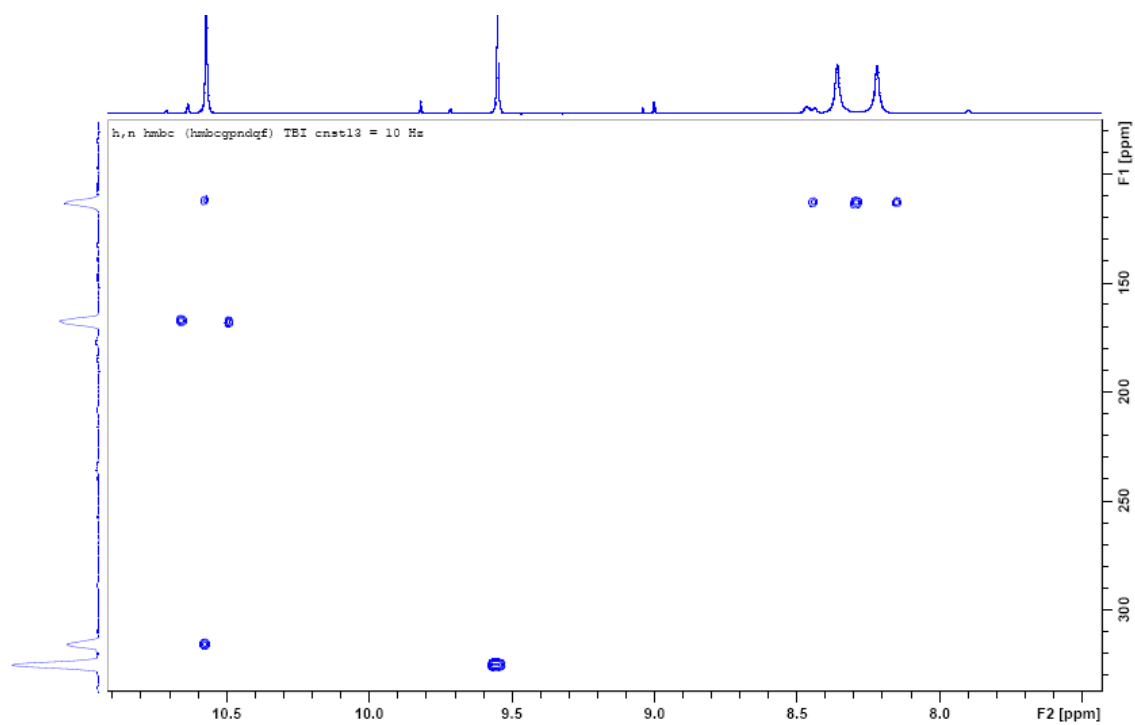

**Figure S4.**  $^{15}\text{N}$  NMR HMBC spectrum of  $\text{H}_2\text{L}^{\text{Et}}$  in  $\text{DMSO-d}_6$  (cnst13 = 10 Hz).

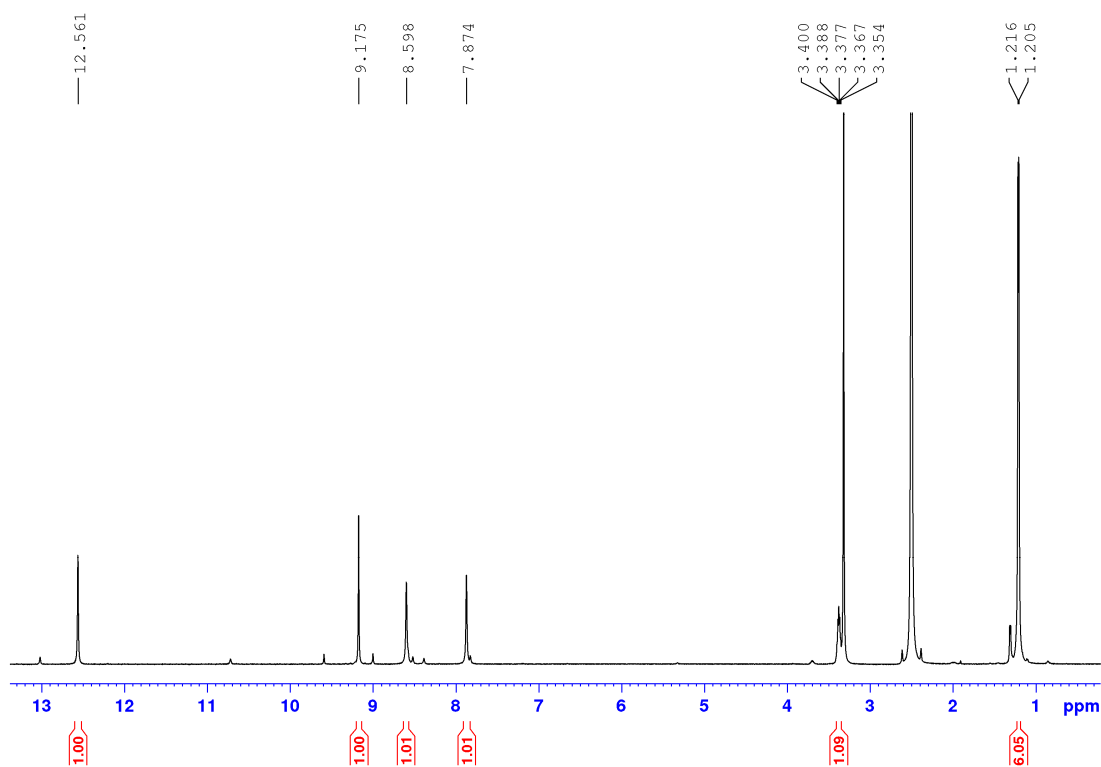

**Figure S5.**  $^1\text{H}$  NMR spectrum of  $\text{H}_2\text{L}^{\text{iPr}}$  in  $\text{DMSO-d}_6$ .

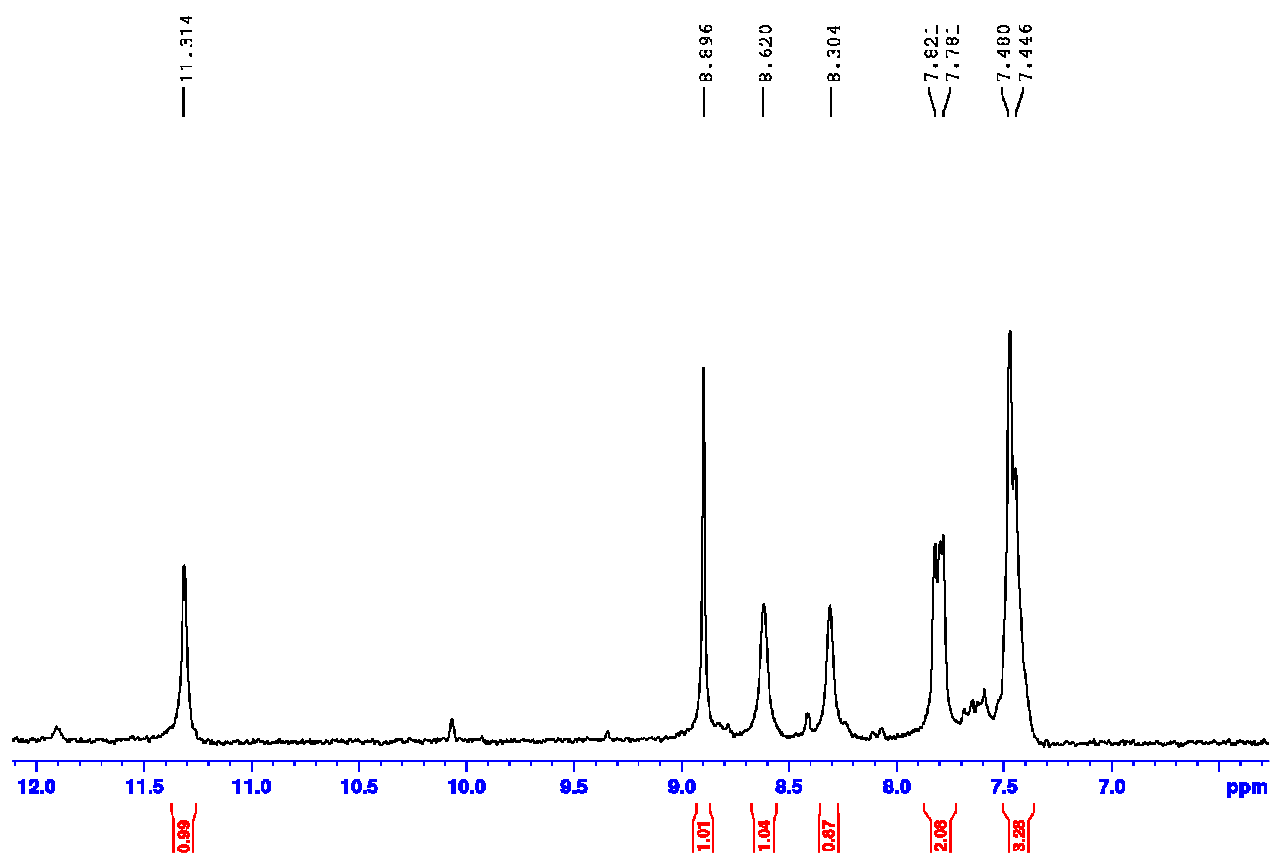

**Figure S6.**  $^1\text{H}$  NMR spectrum of  $\text{H}_2\text{L}^{\text{Ph}}$  in  $\text{DMSO-d}_6$ .

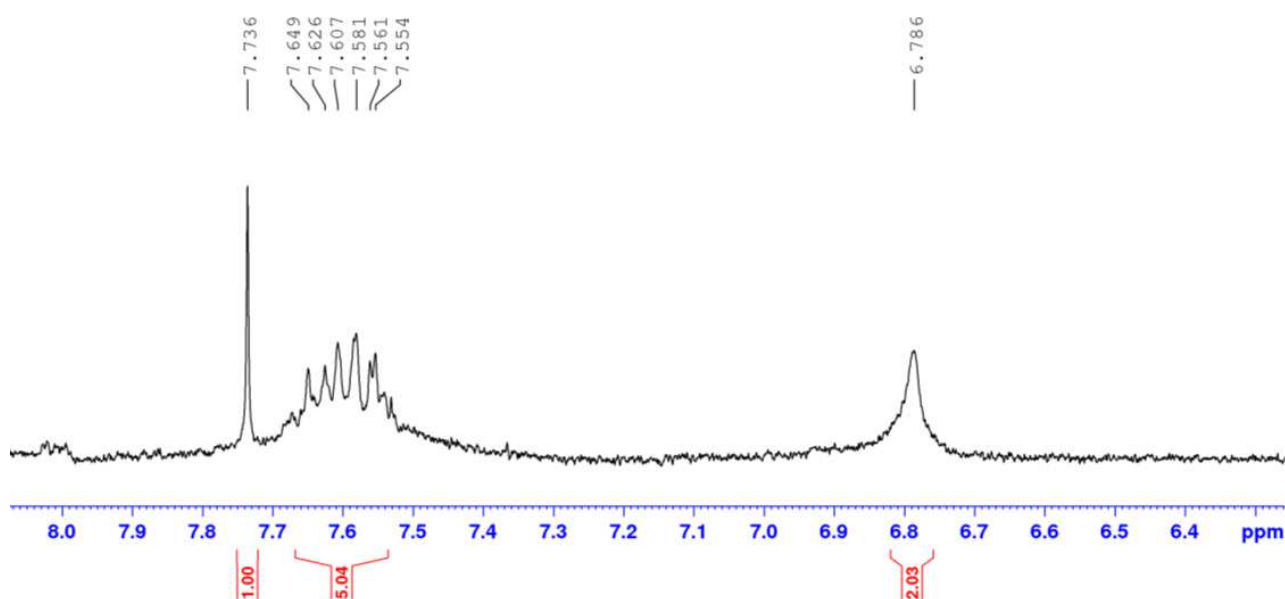

**Figure S7.**  $^1\text{H}$  NMR spectrum of  $[\text{Zn}_4(\text{L}^{\text{Ph}})_4]$  in acetone- $\text{d}_6$  with NS = 1024 und  $D_1 = 2$  s.

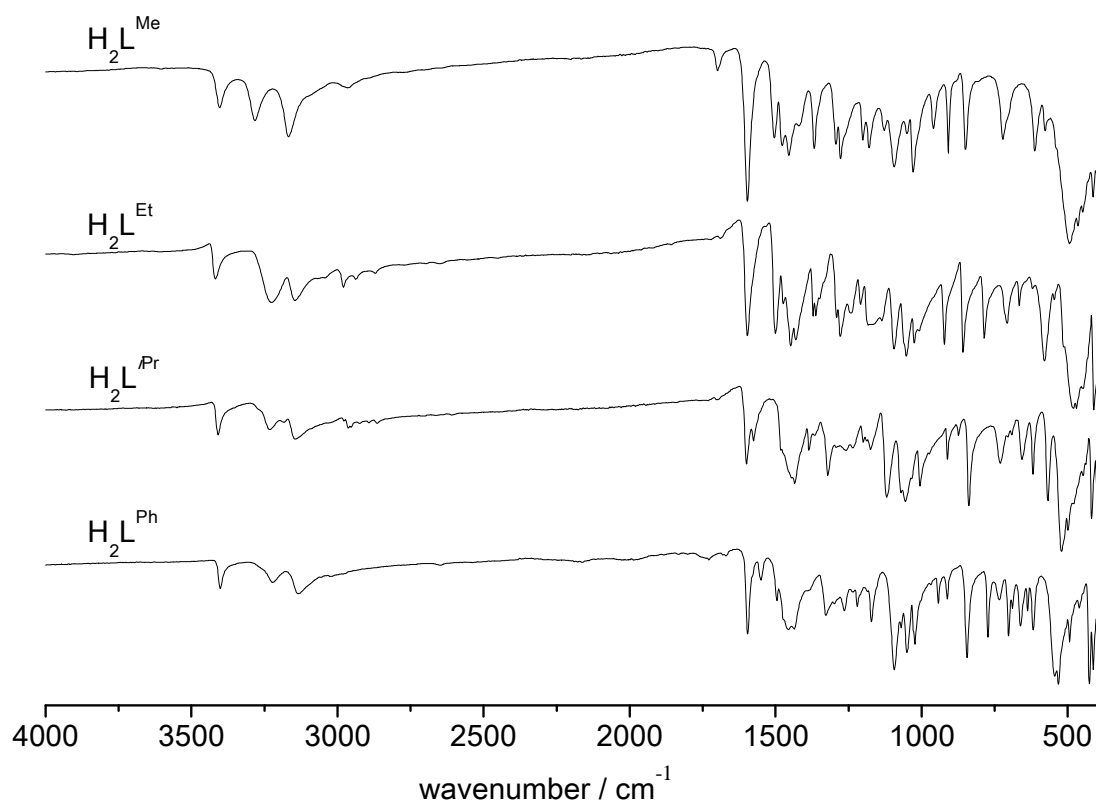

**Figure S8.** IR spectra of  $\text{H}_2\text{L}^{\text{R}}$  (neat).

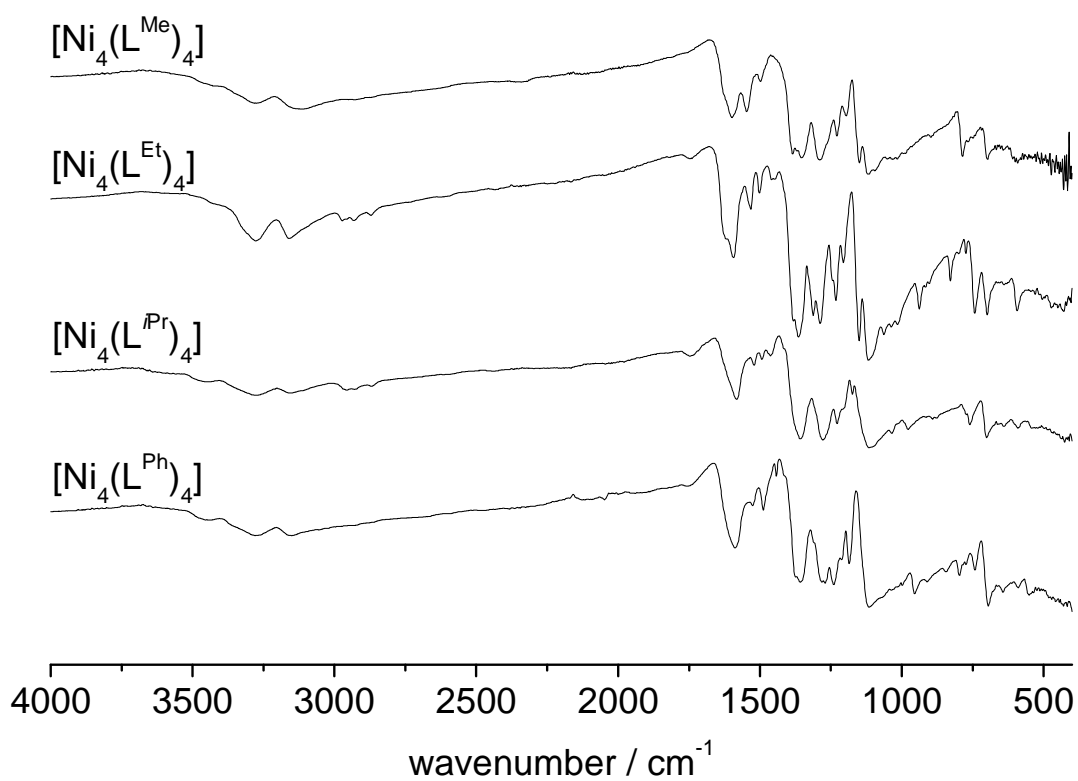

**Figure S9.** IR spectra of  $[\text{Ni}_4(\text{L}^{\text{R}})_4]$  (neat).

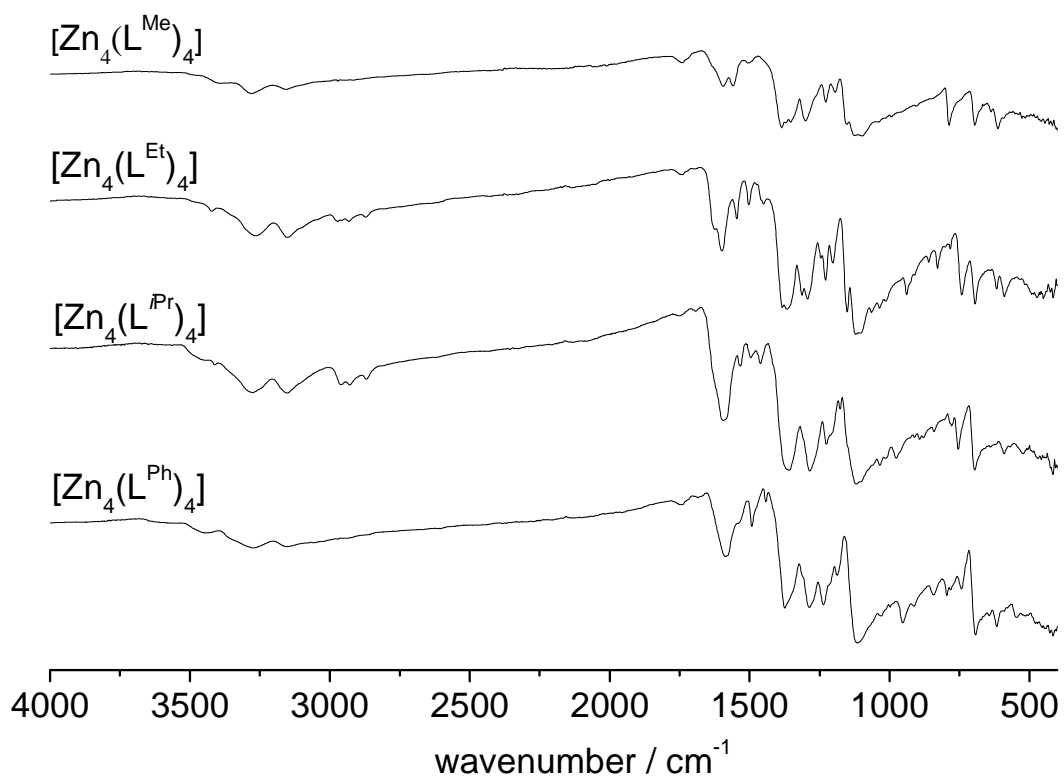

**Figure S10.** IR spectra of  $[\text{Zn}_4(\text{L}^{\text{R}})_4]$  (neat).



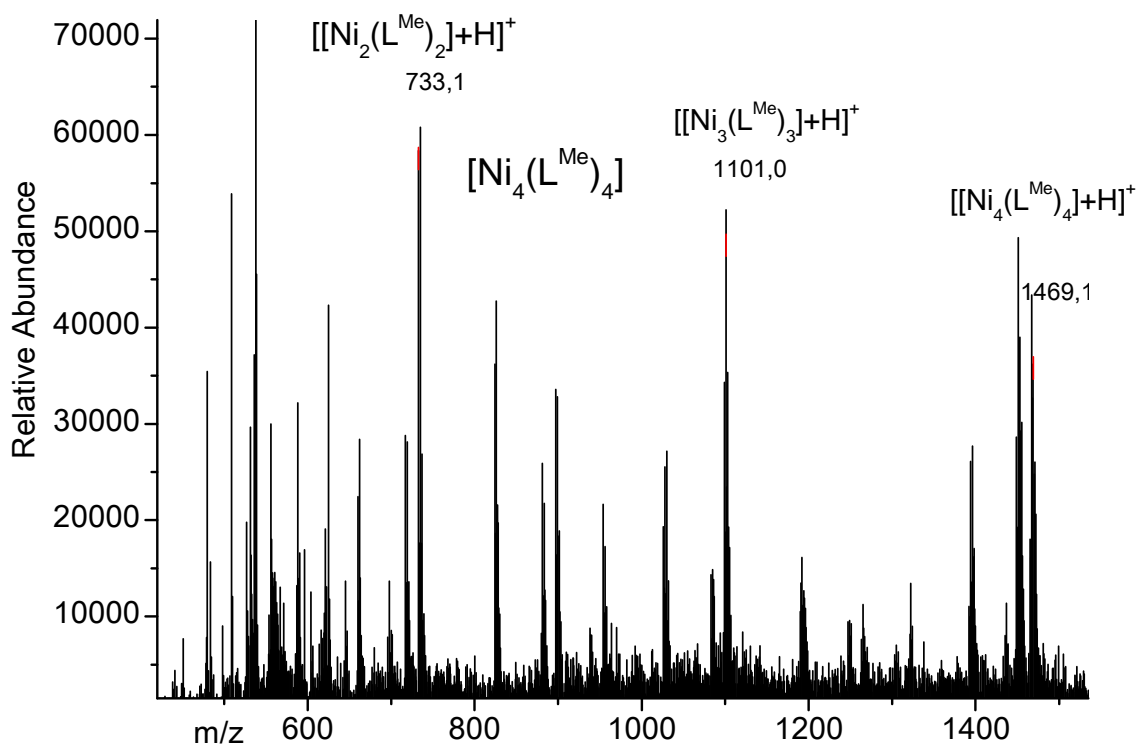

**Figure S11.** ESI MS(+) of  $[\text{Ni}_4(\text{L}^{\text{Me}})_4]$ .

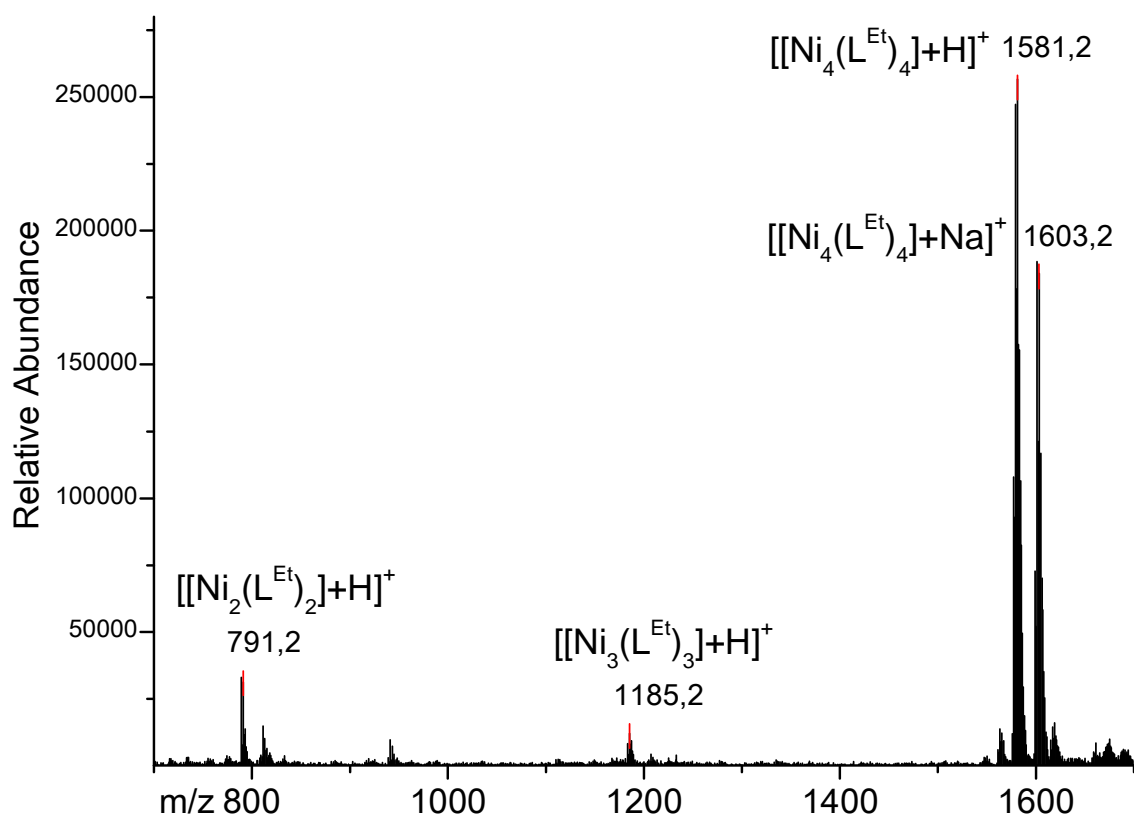

**Figure S12.** ESI MS(+) of  $[\text{Ni}_4(\text{L}^{\text{Et}})_4]$ .

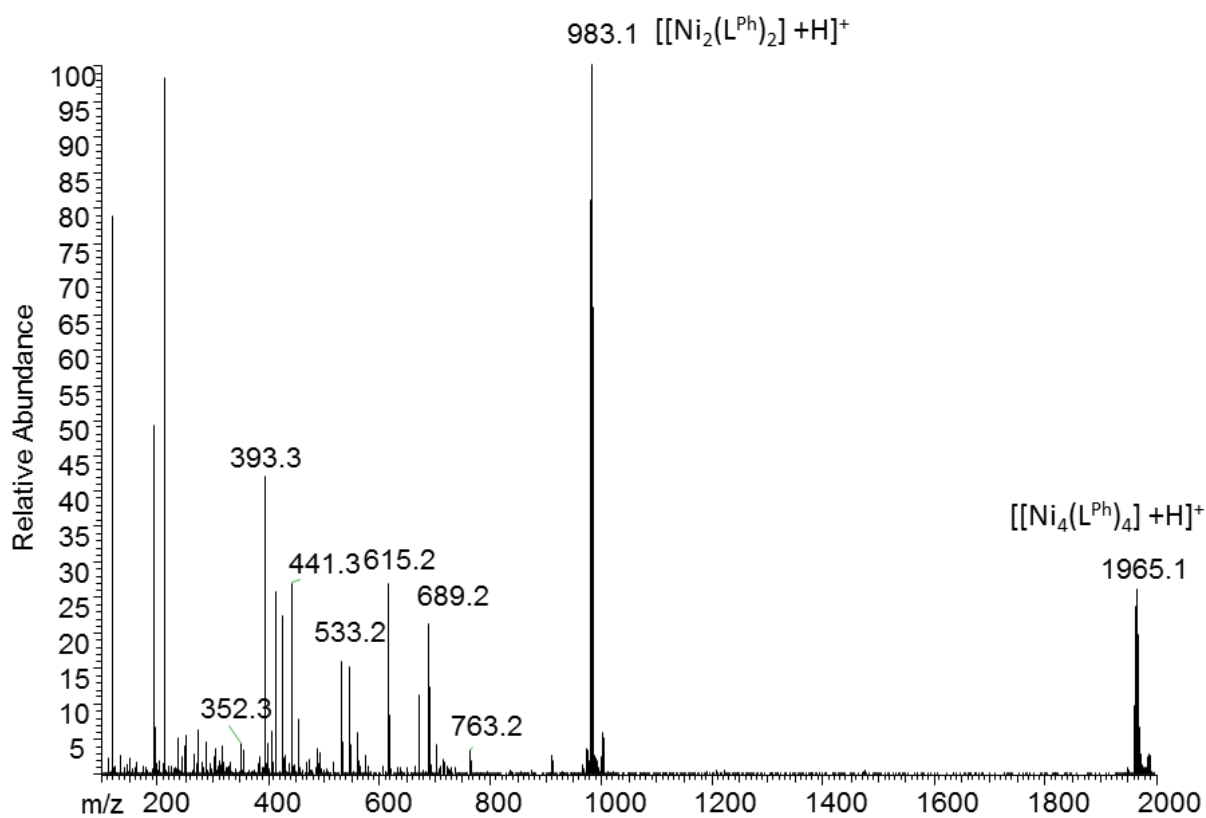

**Figure S13.** ESI MS(+) of  $[\text{Ni}_4(\text{L}^{\text{Ph}})_4]$ .

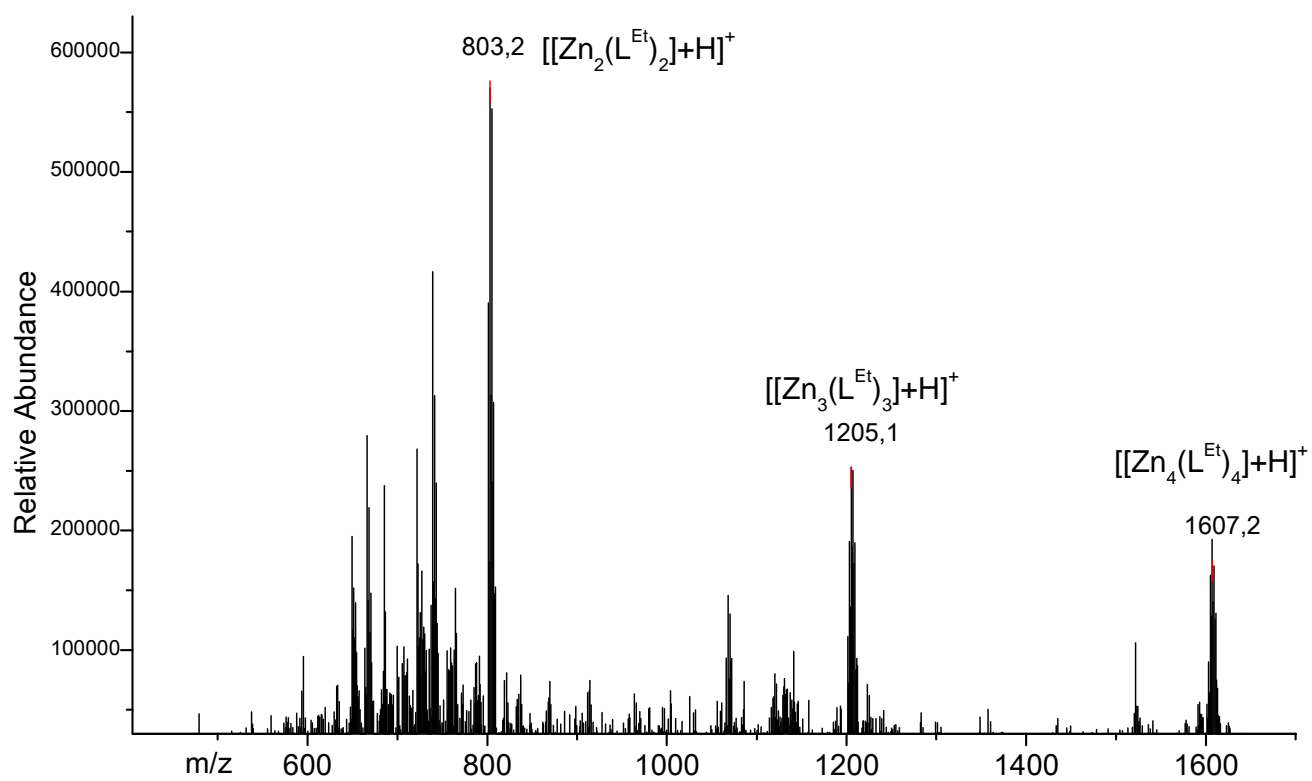

**Figure S14.** ESI MS(+) of  $[\text{Zn}_4(\text{L}^{\text{Et}})_4]$ .

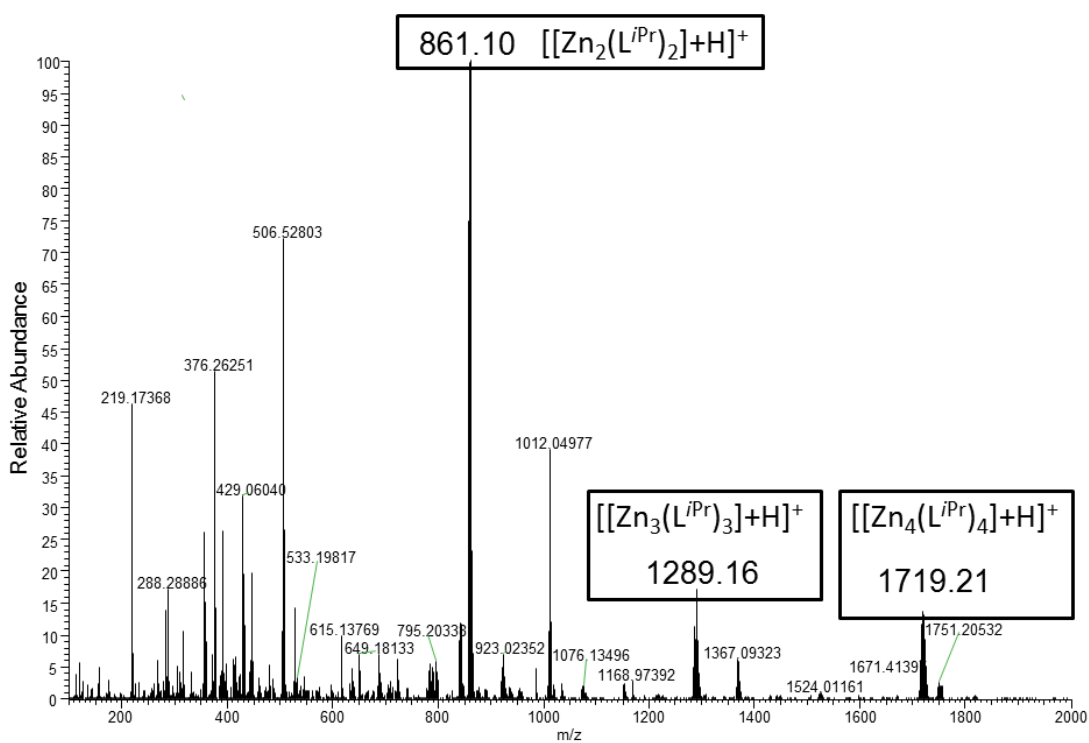

**Figure S15.** ESI MS(+) of  $[\text{Zn}_4(\text{L}^{\text{iPr}})_4]$ .

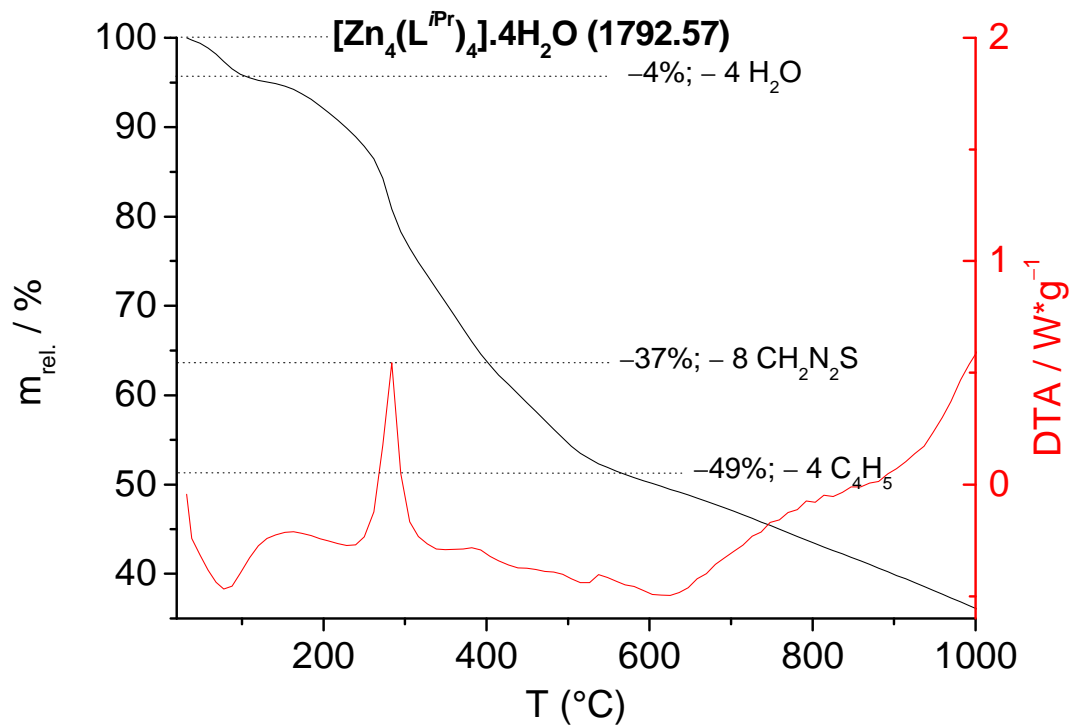

**Figure S16.** TG-DTA of  $[\text{Zn}_4(\text{L}^{\text{iPr}})_4] \cdot 4\text{H}_2\text{O}$ .

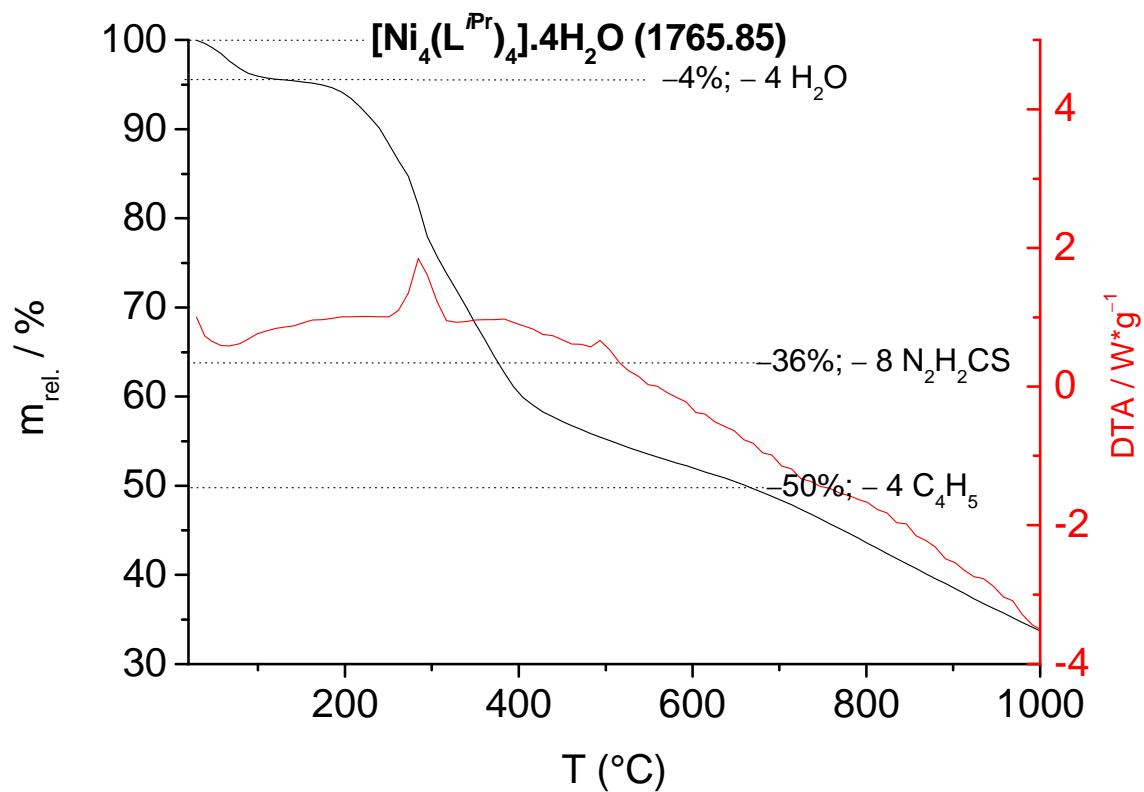

**Figure S17.** TG-DTA of [Ni<sub>4</sub>(L<sup>iPr</sup>)<sub>4</sub>]·4H<sub>2</sub>O.

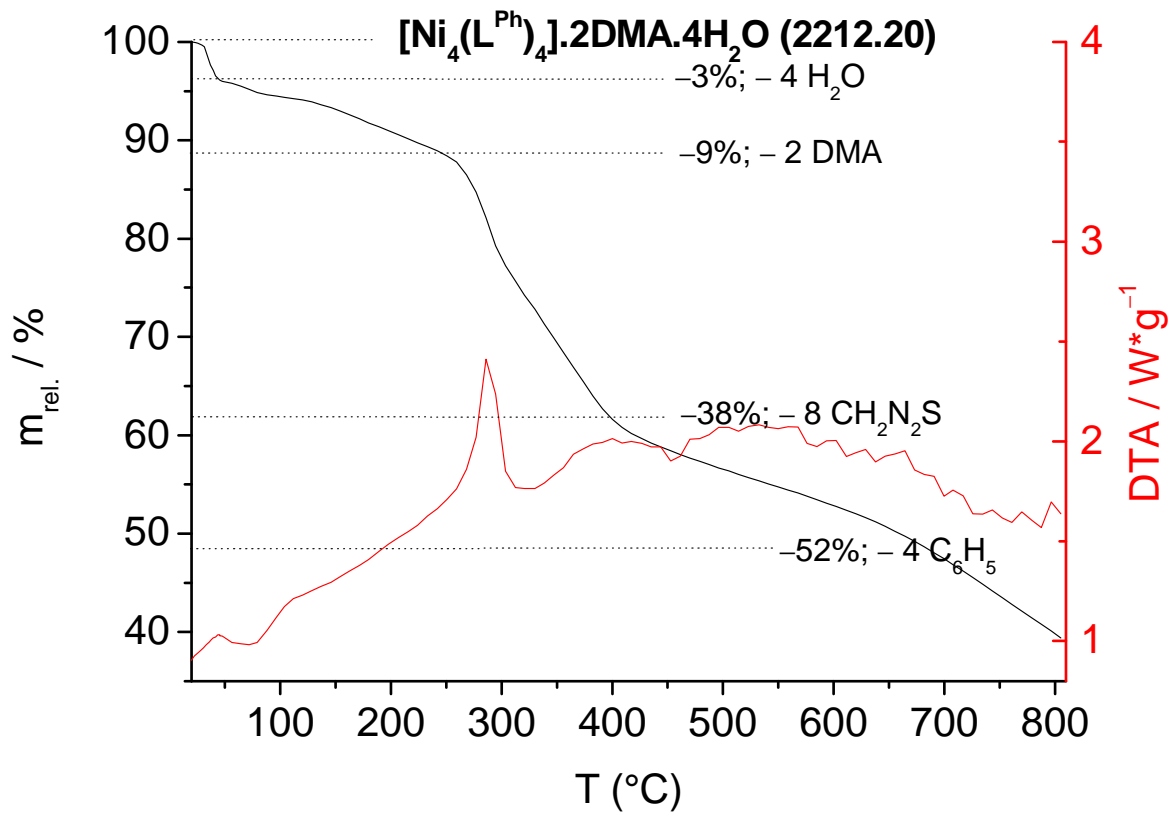

**Figure S18.** TG-DTA of [Ni<sub>4</sub>(L<sup>Ph</sup>)<sub>4</sub>]·2DMA·4H<sub>2</sub>O.

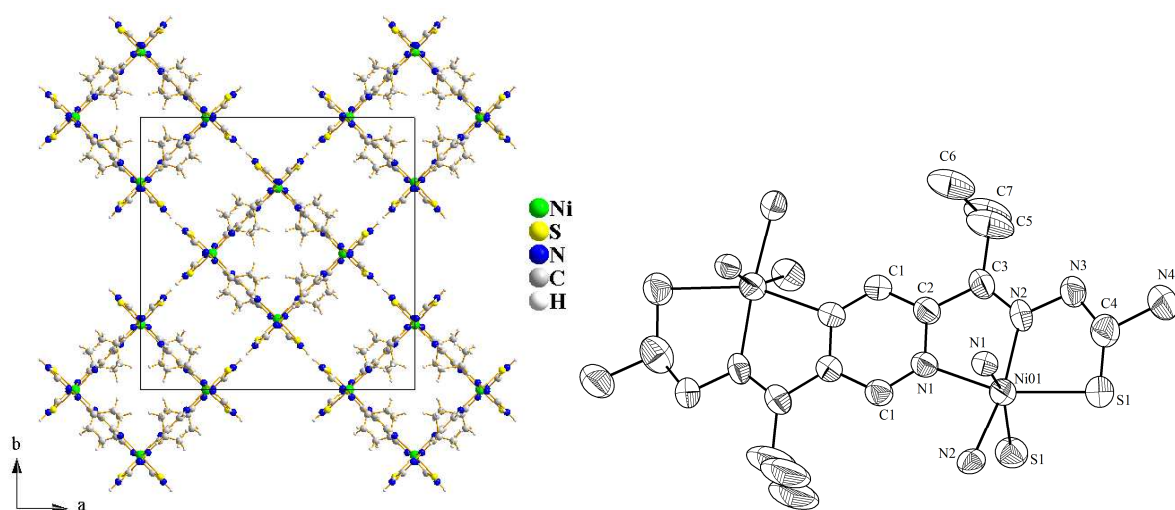

**Figure S19.** Crystal structure of  $[\text{Ni}_4(\text{L}^{\text{iPr}})_4]$  at 293(2) K (left) viewed along the crystallographic  $c$  axis and an ORTEP plot of the binuclear coordination unit (right) shown at 50% probability level; protons were omitted for clarity.

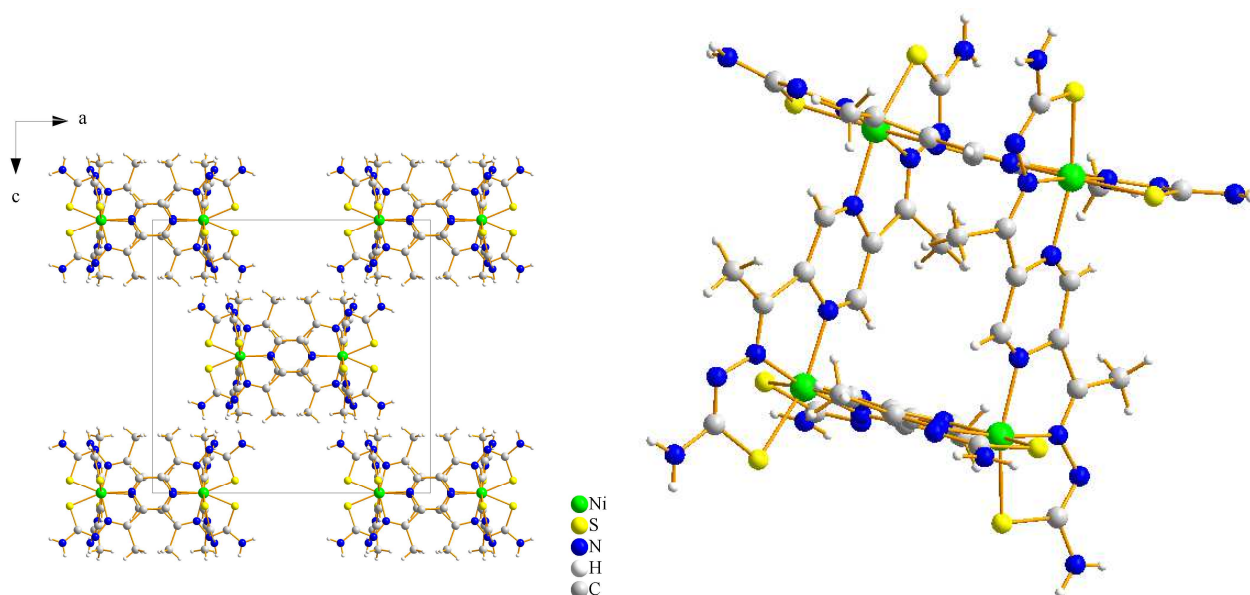

**Figure S20.** Crystal structure of  $[\text{Ni}_4(\text{L}^{\text{Me}})_4]$  at 293(2) K, solved in  $I422$  (left) viewed along the crystallographic  $b$  axis and a molecular view on the complex (right).

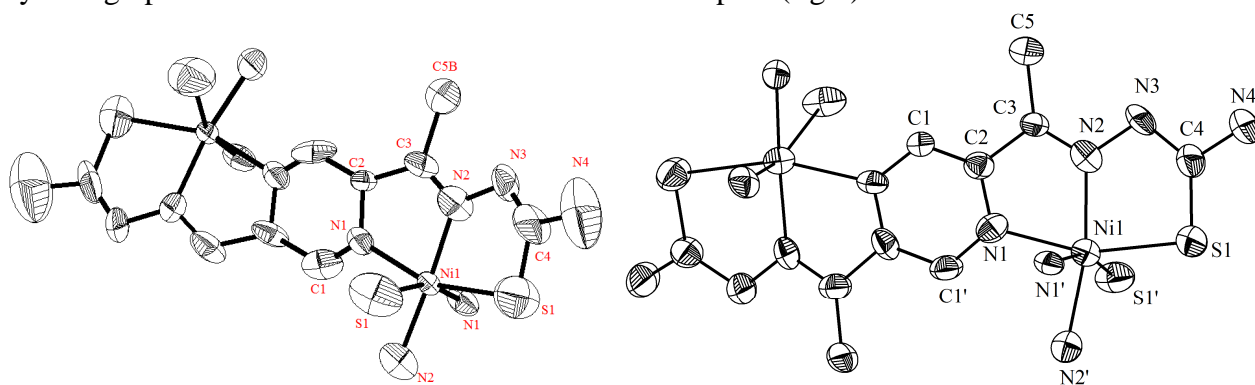

**Figure S21.** ORTEP plots of the binuclear coordination unit of  $[\text{Ni}_4(\text{L}^{\text{Me}})_4]$  at 293(2) K, solved in  $I422$  (left) and  $[\text{Ni}_4(\text{L}^{\text{Me}})_4]\cdot\text{H}_2\text{O}$  at 170(2) K, solved in  $P4nc$  (right) with numbering shown at 50% probability level; protons were omitted for clarity.

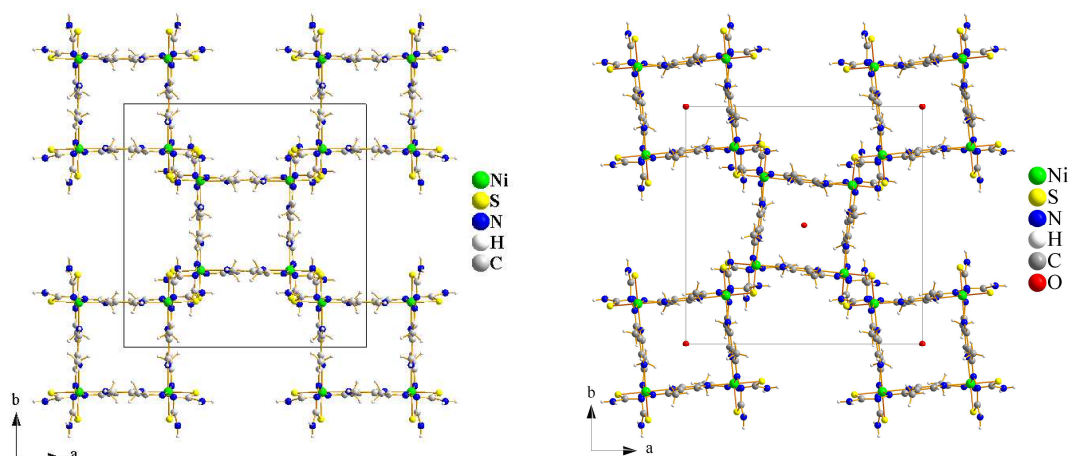

**Figure 22.** Crystal structures of  $[\text{Ni}_4(\text{L}^{\text{Me}})_4]$  at 293(2) K in  $I422$  (left) and  $[\text{Ni}_4(\text{L}^{\text{Me}})_4] \cdot \text{H}_2\text{O}$  at 170(2) K in  $P4nc$  (right) both viewed along the crystallographic  $c$  axis.

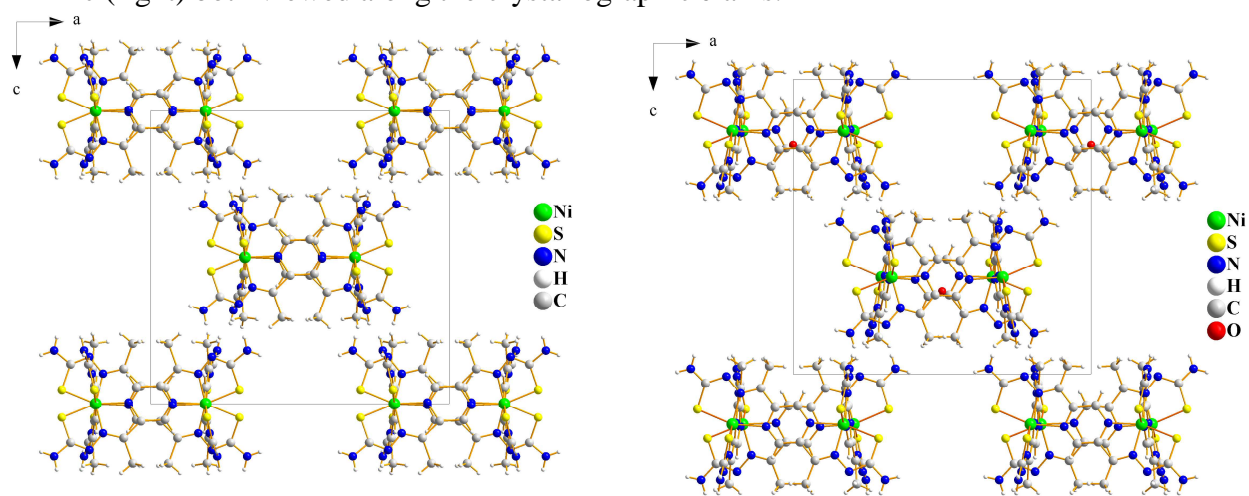

**Figure S23.** Crystal structures of  $[\text{Ni}_4(\text{L}^{\text{Me}})_4] \cdot \text{H}_2\text{O}$  at 293(2) K in  $I422$  (left) and  $[\text{Ni}_4(\text{L}^{\text{Me}})_4] \cdot \text{H}_2\text{O}$  at 170(2) K in  $P4nc$  (right) both viewed along the crystallographic  $b$  axis.

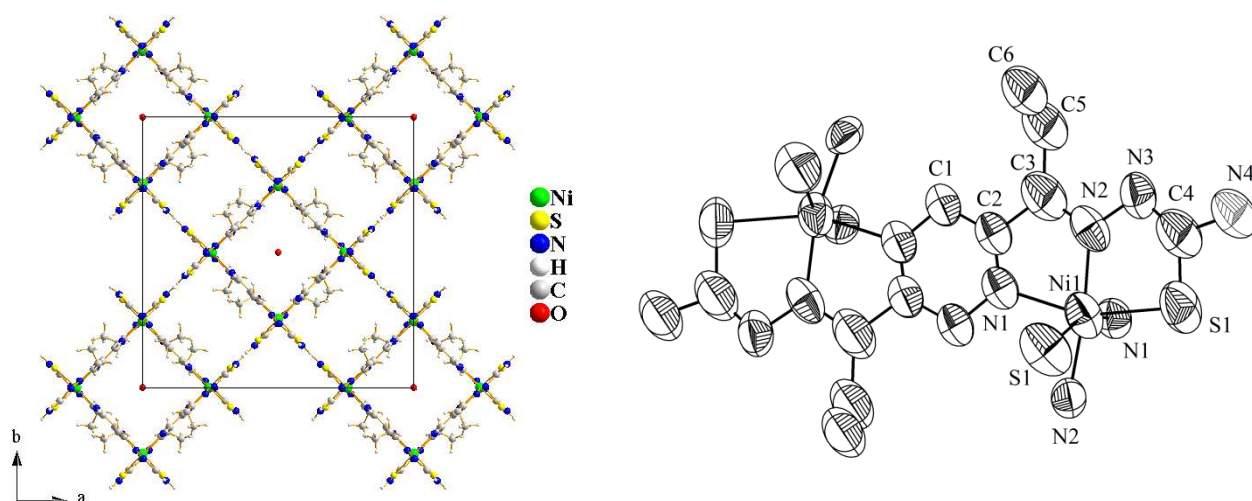

**Figure S24.** Crystal structure of  $[\text{Ni}_4(\text{L}^{\text{Et}})_4] \cdot \text{H}_2\text{O}$  at 293(2) K (left) viewed along the crystallographic  $c$  axis and an ORTEP plot of the binuclear coordination unit (right) shown at 50% probability level; protons were omitted for clarity.



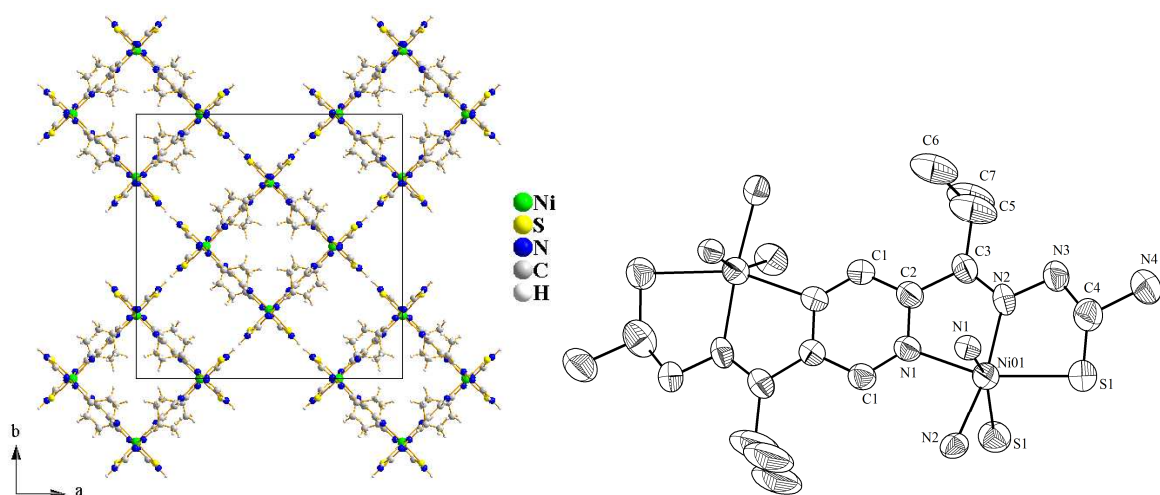

**Figure S25.** Crystal structure of  $[\text{Ni}_4(\text{L}^{\text{iPr}})_4]$  at 293(2) K (left) viewed along the crystallographic  $c$  axis and an ORTEP plot of the binuclear coordination unit (right) shown at 50% probability level; protons were omitted for clarity.

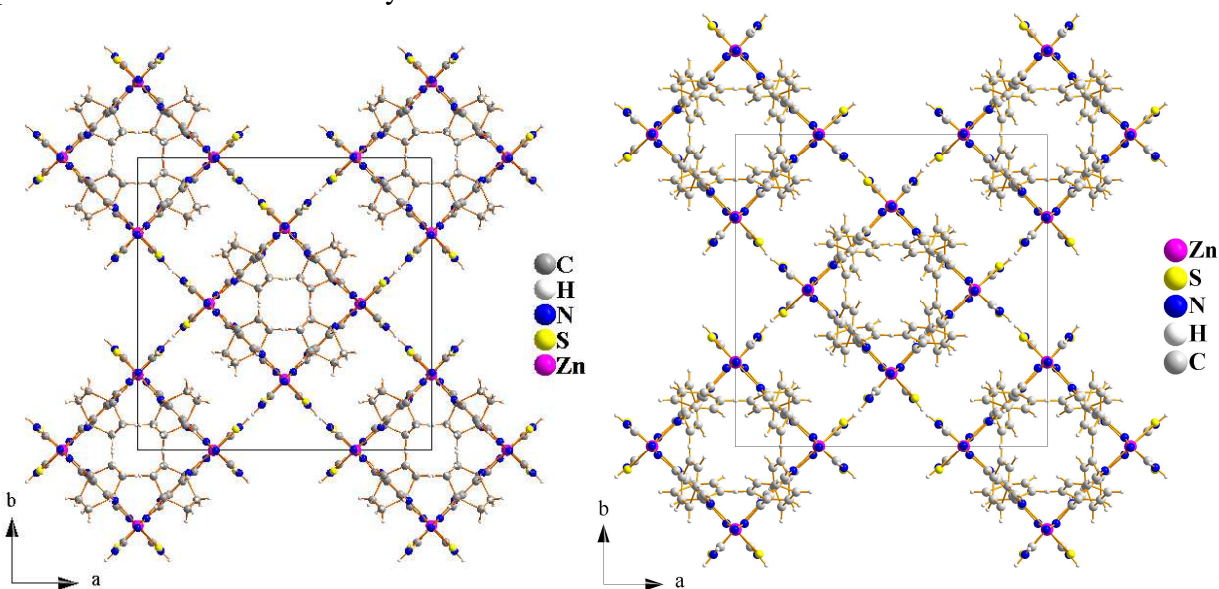

**Figure S26.** Crystal structures of  $[\text{Zn}_4(\text{L}^{\text{iPr}})_4]$  at 170(2) K in  $I422$  (left) and  $[\text{Zn}_4(\text{L}^{\text{Ph}})_4]$  (right) at 293(2) K in  $I422$  both viewed along the crystallographic  $c$  axis.

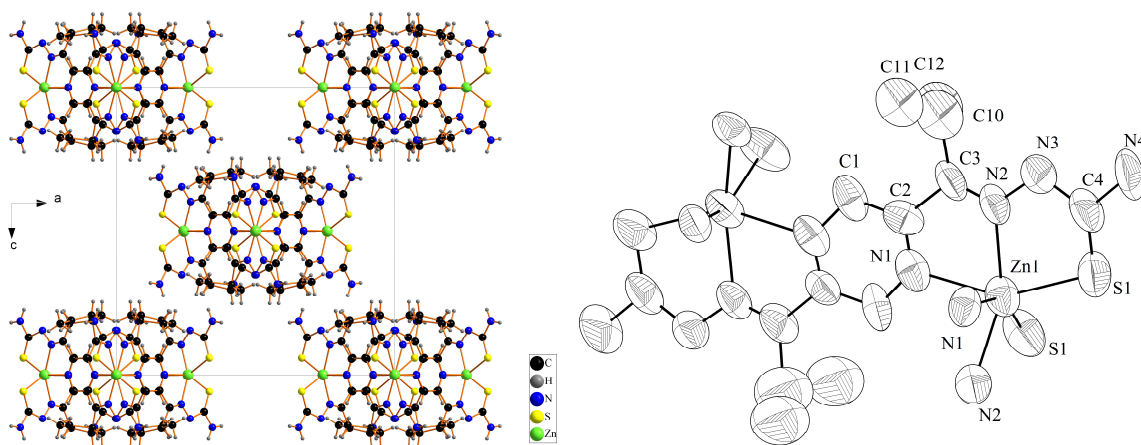

**Figure S27.** Crystal structure of  $[\text{Zn}_4(\text{L}^{\text{iPr}})_4]$  at 170(2) K (left) viewed along the crystallographic  $b$  axis and an ORTEP plot of the binuclear coordination unit (right) shown at 30% probability level; protons were omitted for clarity.

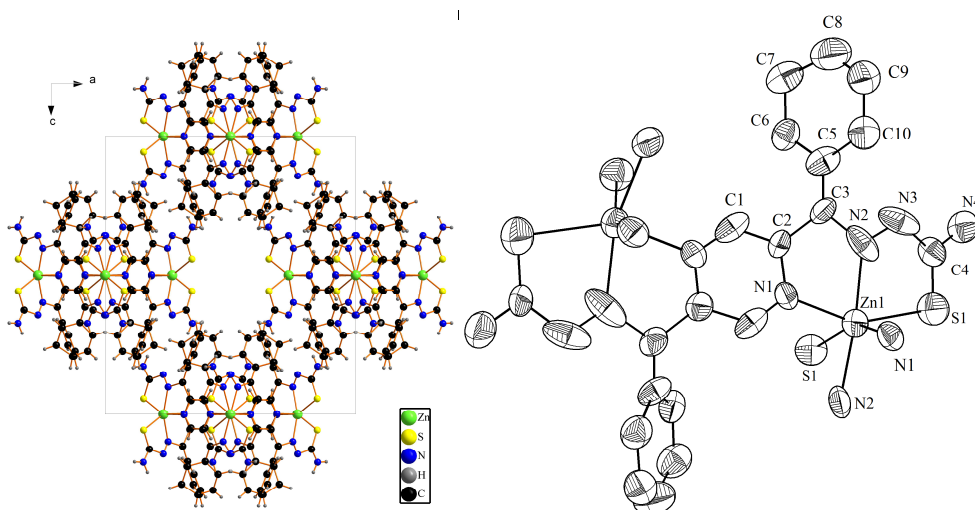

**Figure S28.** Crystal structure of  $[\text{Zn}_4(\text{L}^{\text{Ph}})_4]$  at 170(2) K (left) viewed along the crystallographic  $b$  axis and an ORTEP plot of the binuclear coordination unit (right) shown at 30% probability level; protons were omitted for clarity.

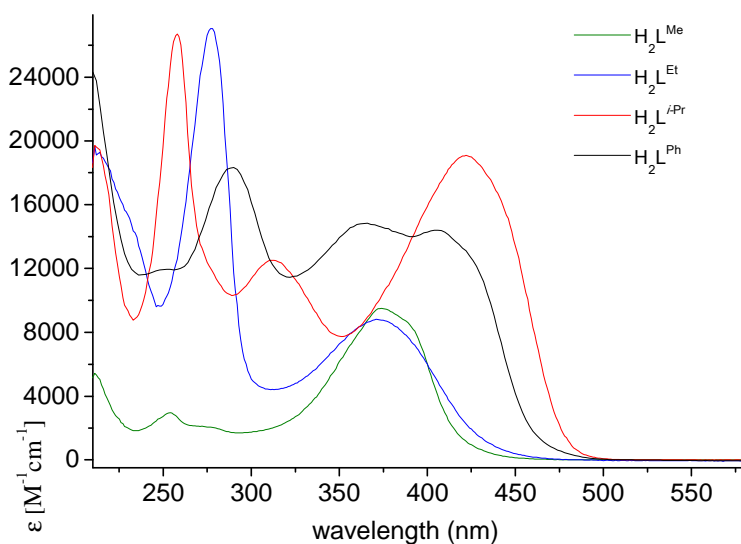

**Figure S29.** UV-vis absorption spectra of ligands  $\text{H}_2\text{L}^{\text{R}}$  in THF.

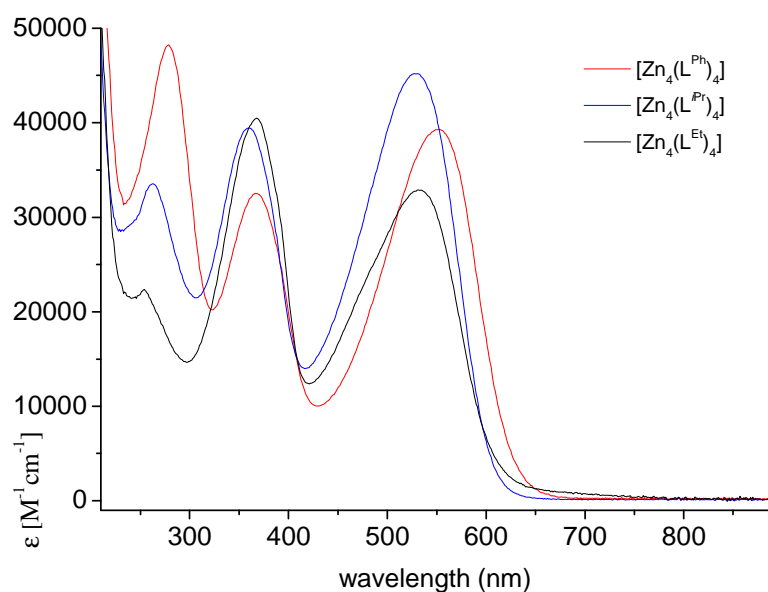

**Figure S30.** UV-vis absorption spectra of  $[\text{Zn}_4(\text{L}^{\text{R}})_4]$  in THF.



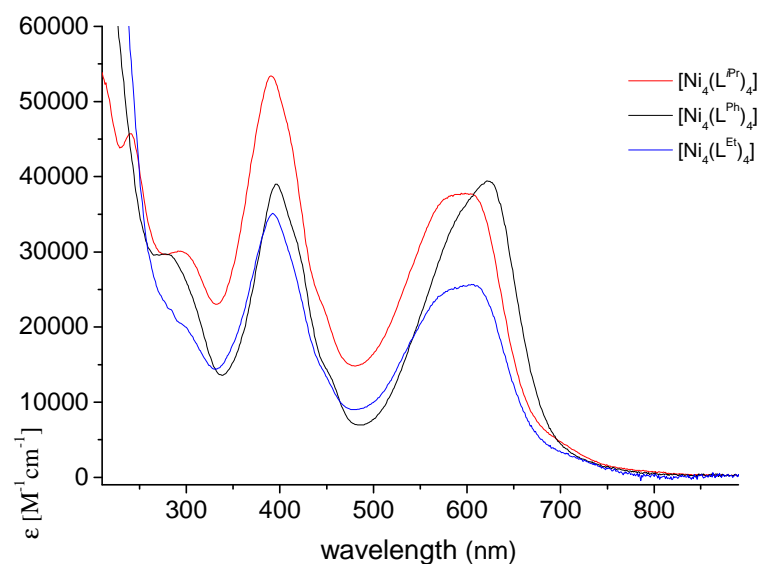

**Figure S31.** UV-vis absorption spectra of  $[\text{Ni}_4(\text{L}^{\text{R}})_4]$  in THF.

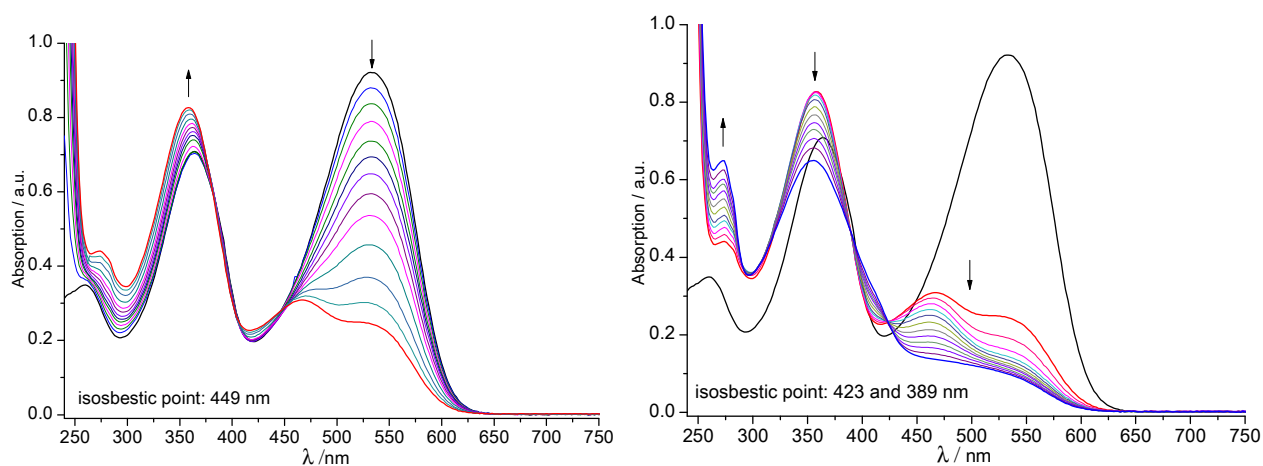

**Figure S32.** UV-vis absorption spectra of  $[\text{Zn}_4(\text{L}^{\text{iPr}})_4]$  ( $4.1 \times 10^{-5}$  mol in 2 mL = 20.5 mmol) in THF after the addition of 0–120  $\mu\text{L}$  (left), 120–230  $\mu\text{L}$  of glacial acetic acid (right). 120  $\mu\text{L}$  represents 0.21 mol.

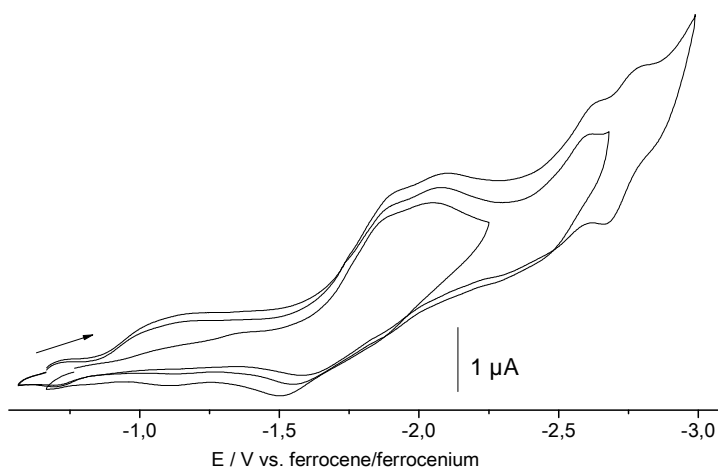

**Figure S33.** Cyclic voltammograms of  $\text{H}_2\text{L}^{\text{Me}}$  in 0.1 M  $n\text{Bu}_4\text{NPF}_6/\text{THF}$  solution at 298 K (scan rate 20 mV/s).

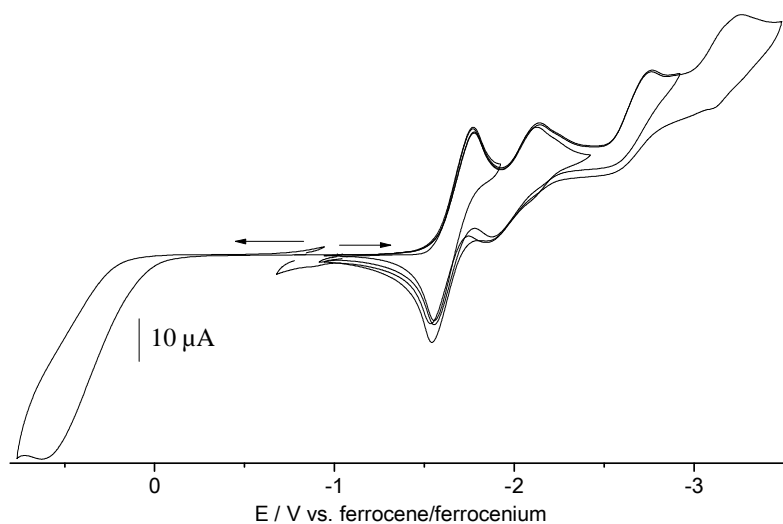

**Figure S34.** Cyclic voltammograms of  $\text{H}_2\text{L}^{\text{Et}}$  in 0.1 M  $n\text{Bu}_4\text{NPF}_6/\text{THF}$  solution at 298 K (scan rate 20 mV/s).

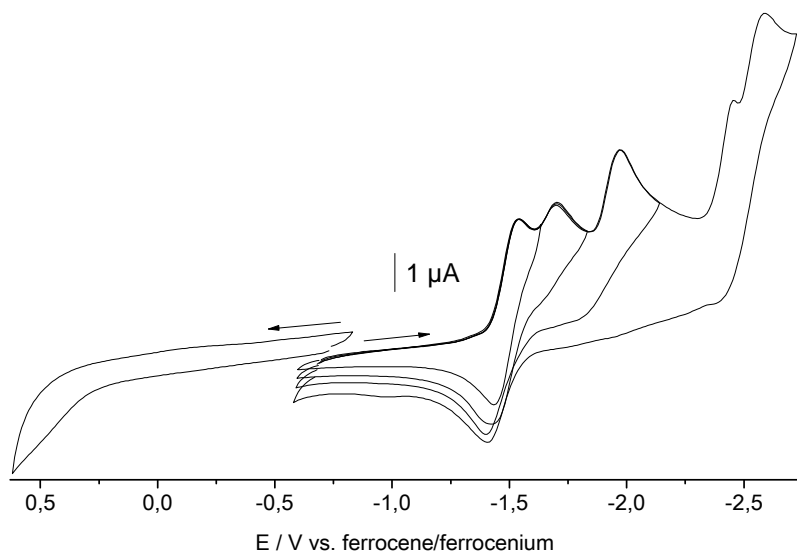

**Figure S35.** Cyclic voltammograms of  $\text{H}_2\text{L}^{\text{Ph}}$  in 0.1 M  $n\text{Bu}_4\text{NPF}_6/\text{THF}$  solution.

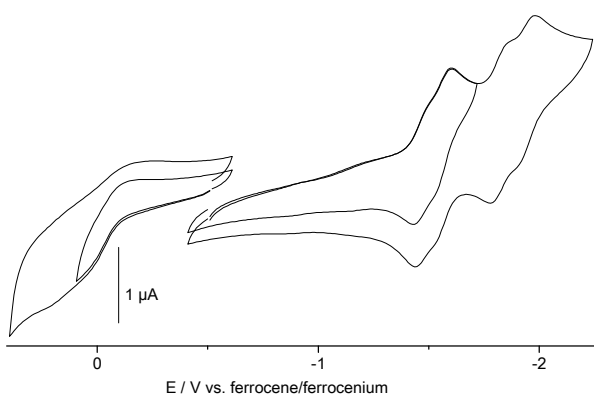

**Figure S36.** Cyclic voltammograms of  $[\text{Ni}_4(\text{L}^{\text{Et}})_4]$  in 0.1 M  $n\text{Bu}_4\text{NPF}_6/\text{THF}$  solution (scan rate 20 mV/s).

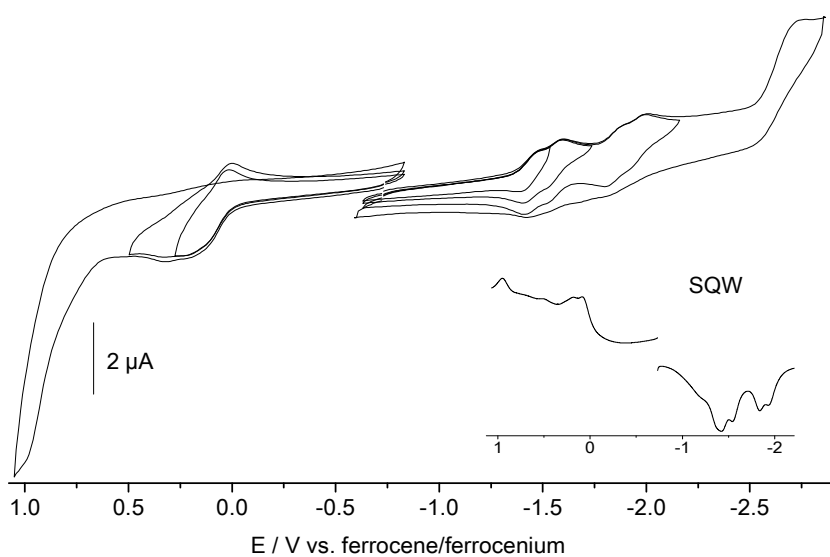

**Figure S37.** Cyclic voltammograms of  $[\text{Ni}_4(\text{L}^{\text{Ph}})_4]$  in 0.1 M  $n\text{Bu}_4\text{NPF}_6/\text{THF}$  solution (top) with square-wave voltammograms (SQW; bottom).

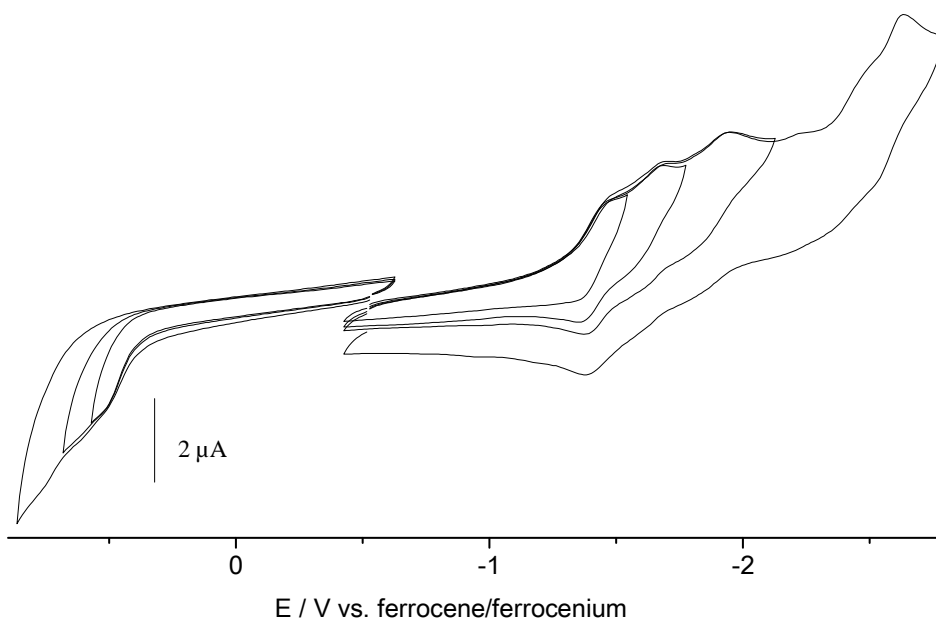

**Figure S38.** Cyclic voltammograms of  $[\text{Zn}_4(\text{L}^{\text{Ph}})_4]$  in 0.1 M of  $n\text{Bu}_4\text{NPF}_6/\text{THF}$  solution.

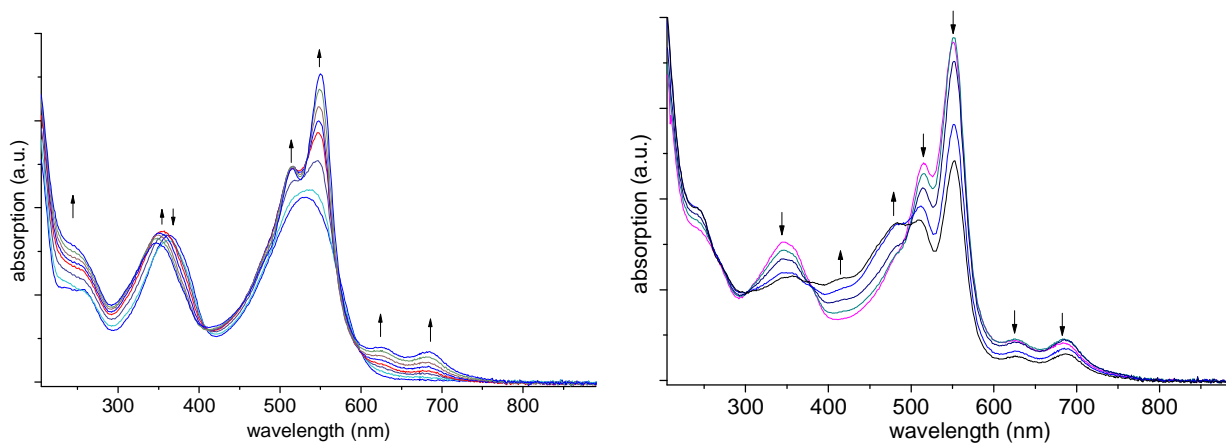

**Figure S39.** UV-vis absorption spectra recorded during cathodic reduction of  $[\text{Zn}_4(\text{L}^{\text{iPr}})_4]$  in  $\text{THF}/^n\text{Bu}_4\text{NPF}_6$  solutions, spectra were recorded at  $E = 0$ , and  $-1.3$  to  $-1.9$  V (left) and from  $E = -1.9$  to  $-2.3$  V (right).

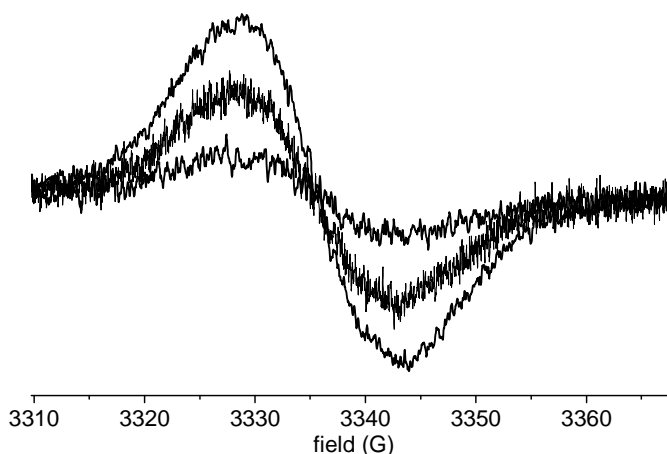

**Figure S40.** X-band EPR spectrum during cathodic reduction of  $[\text{Ni}_4(\text{L}^{\text{iPr}})_4]$  in  $\text{THF}/^n\text{Bu}_4\text{NPF}_6$  solution. Spectra recorded at  $-1.5$ ,  $-1.7$  and  $-1.9$  V with a signal at  $g = 2.016$ .

### C) Supporting Tables

**Table S1.** Selected crystallographic and structure refinement data for  $[\text{M}_4(\text{L}^{\text{R}})_4]$  ( $\text{M} = \text{Ni}$  or  $\text{Zn}$ )

|                                                      | $[\text{Ni}_4(\text{L}^{\text{iPr}})_4]$                       | $[\text{Ni}_4(\text{L}^{\text{Et}})_4] \cdot \text{H}_2\text{O}$         | $[\text{Ni}_4(\text{L}^{\text{Me}})_4]$                        | $[\text{Ni}_4(\text{L}^{\text{Me}})_4] \cdot \text{H}_2\text{O}$         | $[\text{Zn}_4(\text{L}^{\text{iPr}})_4]$                       | $[\text{Zn}_4(\text{L}^{\text{Ph}})_4]$                        |
|------------------------------------------------------|----------------------------------------------------------------|--------------------------------------------------------------------------|----------------------------------------------------------------|--------------------------------------------------------------------------|----------------------------------------------------------------|----------------------------------------------------------------|
| formula                                              | $\text{C}_{56}\text{H}_{80}\text{N}_{32}\text{S}_8\text{Ni}_4$ | $\text{C}_{48}\text{H}_{64}\text{N}_{32}\text{Ni}_4\text{O}_8\text{S}_8$ | $\text{C}_{40}\text{H}_{48}\text{N}_{32}\text{Ni}_4\text{S}_8$ | $\text{C}_{40}\text{H}_{48}\text{N}_{32}\text{Ni}_4\text{O}_8\text{S}_8$ | $\text{C}_{56}\text{H}_{80}\text{N}_{32}\text{S}_8\text{Zn}_4$ | $\text{C}_{80}\text{H}_{64}\text{N}_{32}\text{S}_8\text{Zn}_4$ |
| weight / $\text{g} \cdot \text{mol}^{-1}$            | 1693.74                                                        | 1596.53                                                                  | 1468.32                                                        | 1484.32                                                                  | 1719.60                                                        | 1991.73                                                        |
| $T / \text{K}$                                       | 293(2)                                                         | 170(2)                                                                   | 293(2)                                                         | 170(2)                                                                   | 170(2)                                                         | 293(2)                                                         |
| crystal system                                       | tetragonal                                                     | tetragonal                                                               | tetragonal                                                     | tetragonal                                                               | tetragonal                                                     | tetragonal                                                     |
| space group                                          | $I422$                                                         | $I422$                                                                   | $I422$                                                         | $P4nc$                                                                   | $I422$                                                         | $I422$                                                         |
| cell: $a / \text{\AA}$                               | 20.434(2)                                                      | 20.065(2)                                                                | 18.8863(9)                                                     | 18.4946(9)                                                               | 19.780(1)                                                      | 19.095(1)                                                      |
| $b / \text{\AA}$                                     | 20.434(2)                                                      | 20.065(2)                                                                | 18.8863(9)                                                     | 18.4946(9)                                                               | 19.780(1)                                                      | 19.095(1)                                                      |
| $c / \text{\AA}$                                     | 19.356(2)                                                      | 19.137(2)                                                                | 18.481(1)                                                      | 18.1930(9)                                                               | 20.291(1)                                                      | 21.311(1)                                                      |
| $V / \text{\AA}^3; Z$                                | 8082(1); 2                                                     | 7705(5); 2                                                               | 6592.1(7); 2                                                   | 6222.9(7); 2                                                             | 7938.8(9); 2                                                   | 7770(1); 2                                                     |
| $\rho_{\text{calc}} / \text{Mg} \cdot \text{m}^{-3}$ | 0.696                                                          | 0.688                                                                    | 0.740                                                          | 0.792                                                                    | 0.719                                                          | 0.851                                                          |
| $F(000)$                                             | 1760                                                           | 1648                                                                     | 1504                                                           | 1520                                                                     | 1776                                                           | 2032                                                           |
| Total; unique reflections                            | 64478; 4581                                                    | 27427; 3261                                                              | 31910; 3526                                                    | 41383; 5129                                                              | 41764; 4242                                                    | 41805; 4143                                                    |
| $R_{\text{int}}$                                     | 0.0937                                                         | 0.3155                                                                   | 0.2731                                                         | 0.1826                                                                   | 0.1391                                                         | 0.1862                                                         |
| Goof on $F^2$                                        | 1.224                                                          | 1.102                                                                    | 0.989                                                          | 1.230                                                                    | 1.145                                                          | 1.189                                                          |
| $R_1; wR_2$<br>[ $I_0 > 2\sigma(I)$ ]                | 0.1087; 0.3048                                                 | 0.1743; 0.4296                                                           | 0.1191; 0.3035                                                 | 0.1235; 0.3323                                                           | 0.1616; 0.3933                                                 | 0.1635; 0.3885                                                 |
| $R_1; wR_2$<br>[all data]                            | 0.1611; 0.3617                                                 | 0.3209; 0.4928                                                           | 0.2531; 0.3937                                                 | 0.1782; 0.3646                                                           | 0.2583; 0.4359                                                 | 0.2697; 0.4430                                                 |
| Residual / $\text{e} \cdot \text{\AA}^{-3}$          | 1.833/−0.570                                                   | 0.919/−0.423                                                             | 2.441/−0.681                                                   | 1.923/−0.717                                                             | 1.038/−0.517                                                   | 2.266/−0.731                                                   |
| CCDC                                                 | 1484517                                                        | 1484516                                                                  | 1484515                                                        | 1484512                                                                  | 1435303                                                        | 1435304                                                        |

**Table S2.** Selected bond lengths /Å and bond angles /° of Ni complexes.

| bond lengths      | [Ni <sub>4</sub> (L <sup>Me</sup> ) <sub>4</sub> ·H <sub>2</sub> O] | [Ni <sub>4</sub> (L <sup>Me</sup> ) <sub>4</sub> ] | [Ni <sub>4</sub> (L <sup>Et</sup> ) <sub>4</sub> ·H <sub>2</sub> O] | [Ni <sub>4</sub> (L <sup>iPr</sup> ) <sub>4</sub> ] |
|-------------------|---------------------------------------------------------------------|----------------------------------------------------|---------------------------------------------------------------------|-----------------------------------------------------|
| Ni1–N2'           | 2.00(2)                                                             | 1.96(2)                                            | 2.01(2)                                                             | 2.023(8)                                            |
| Ni1–N2            | 2.00(2)                                                             | 1.96(2)                                            | 2.01(2)                                                             | 2.023(8)                                            |
| Ni1–N1            | 2.09(2)                                                             | 2.09(1)                                            | 2.12(2)                                                             | 2.115(6)                                            |
| Ni1–N1'           | 2.10(1)                                                             | 2.09(1)                                            | 2.12(2)                                                             | 2.115(6)                                            |
| Ni1–S1            | 2.356(6)                                                            | 2.313(7)                                           | 2.377(8)                                                            | 2.381(3)                                            |
| Ni1–S1'           | 2.373(6)                                                            | 2.313(7)                                           | 2.378(8)                                                            | 2.381(3)                                            |
| S1–C4             | 1.68(2)                                                             | 1.73(2)                                            | 1.70(4)                                                             | 1.60(1)                                             |
| S1'–C4'           | 1.73(2)                                                             |                                                    |                                                                     |                                                     |
| N(4)–C(4)         | 1.39(3)                                                             | 1.38(3)                                            | 1.40(4)                                                             | 1.57(2)                                             |
| N(4')–C(4')       | 1.30(3)                                                             |                                                    |                                                                     |                                                     |
| N(3)–C(4)         | 1.38(3)                                                             | 1.28(3)                                            | 1.32(4)                                                             | 1.29(2)                                             |
| N(3')–C(4')       | 1.37(3)                                                             |                                                    |                                                                     |                                                     |
| N(3)–N(2)         | 1.39(2)                                                             | 1.37(2)                                            | 1.40(2)                                                             | 1.38(1)                                             |
| N(2')–N(3')       | 1.38(3)                                                             |                                                    |                                                                     |                                                     |
| N(2)–C(3)         | 1.28(3)                                                             | 1.34(2)                                            | 1.39(4)                                                             | 1.28(1)                                             |
| N(2')–C(3')       | 1.30(3)                                                             |                                                    |                                                                     |                                                     |
| angles            |                                                                     |                                                    |                                                                     |                                                     |
| N(2')–Ni(1)–N(2)  | 168.4(6)                                                            | 171.0(8)                                           | 166(1)                                                              | 168.7(4)                                            |
| N(2')–Ni(1)–N(1)  | 93.3(7)                                                             | 95.0(6)                                            | 92.6(8)                                                             | 93.7(2)                                             |
| N(2)–Ni(1)–N(1)   | 77.1(8)                                                             | 78.5(6)                                            | 77.3(10)                                                            | 78.4(3)                                             |
| N(2')–Ni(1)–N(1') | 79.1(7)                                                             | 78.5(6)                                            | 77.3(10)                                                            | 78.4(3)                                             |
| N(2)–Ni(1)–N(1')  | 93.8(7)                                                             | 95.0(6)                                            | 92.6(8)                                                             | 93.7(2)                                             |
| N(1)–Ni(1)–N(1')  | 88.0(5)                                                             | 88.7(8)                                            | 91.4(9)                                                             | 91.9(3)                                             |
| N(2')–Ni(1)–S(1)  | 105.8(5)                                                            | 105.0(5)                                           | 108.9(6)                                                            | 106.3(2)                                            |
| N(2)–Ni(1)–S(1)   | 83.3(5)                                                             | 81.2(5)                                            | 81.0(7)                                                             | 81.6(2)                                             |
| N(1)–Ni(1)–S(1)   | 160.2(6)                                                            | 159.7(5)                                           | 158.3(7)                                                            | 159.9(2)                                            |
| N(1')–Ni(1)–S(1)  | 90.2(4)                                                             | 91.8(5)                                            | 90.8(6)                                                             | 90.3(2)                                             |
| N(2')–Ni(1)–S(1') | 82.0(5)                                                             | 81.2(5)                                            | 81.0(7)                                                             | 81.6(2)                                             |
| N(2)–Ni(1)–S(1')  | 104.4(5)                                                            | 105.0(5)                                           | 108.9(6)                                                            | 106.3(2)                                            |
| N(1)–Ni(1)–S(1')  | 90.4(4)                                                             | 91.8(5)                                            | 90.8(6)                                                             | 90.3(2)                                             |
| N(1')–Ni(1)–S(1') | 160.9(5)                                                            | 159.7(5)                                           | 158.3(7)                                                            | 159.9(2)                                            |
| S(1)–Ni(1)–S(1')  | 97.6(2)                                                             | 94.6(4)                                            | 95.0(5)                                                             | 94.5(2)                                             |

**Table S3.** Selected bond lengths /Å and bond angles /° of Zn complexes.

| bond lengths | [Zn <sub>4</sub> (L <sup>iPr</sup> ) <sub>4</sub> ] | [Zn <sub>4</sub> (L <sup>Ph</sup> ) <sub>4</sub> ] |
|--------------|-----------------------------------------------------|----------------------------------------------------|
| Zn(1)–N(2)   | 2.21(2)                                             | 2.20(3)                                            |
| Zn(1)–N(1)   | 2.28(1)                                             | 2.20(2)                                            |
| Zn(1)–S(1)   | 2.380(5)                                            | 2.415(7)                                           |
| C(4)–S(1)    | 1.54(2)                                             | 1.62(3)                                            |
| C(4)–N(4)    | 1.42(2)                                             | 1.19(3)                                            |
| C(4)–N(3)    | 1.44(3)                                             | 1.42(3)                                            |
| N(2)–N(3)    | 1.35(2)                                             | 1.18(3)                                            |
| C(3)–N(2)    | 1.22(2)                                             | 1.52(3)                                            |

|                  |          |          |
|------------------|----------|----------|
| angles           |          |          |
| N(2')–Zn(1)–N(2) | 154.6(7) | 161(1)   |
| N(2)–Zn(1)–N(1') | 90.0(6)  | 92.4(7)  |
| N(1)–Zn(1)–N(1') | 84.7(6)  | 88.4(9)  |
| N(1)–Zn(1)–S(1') | 93.6(4)  | 91.0(5)  |
| S(1)–Zn(1)–S(1') | 101.3(3) | 103.1(4) |
| N(2')–Zn(1)–S(1) | 117.0(4) | 115.2(5) |
| N(2)–Zn(1)–S(1)  | 79.9(4)  | 77.1(7)  |
| N(1)–Zn(1)–S(1)  | 150.9(5) | 151.0(5) |
| N(2)–Zn(1)–N(1)  | 71.1(6)  | 74.0(8)  |

**Table S4.** Absorption maxima of the  $H_2L^R$  ligands and the Zn and Ni complexes.<sup>a</sup>

| compound            | $\lambda_1$ (ε) | $\lambda_2$ (ε) | $\lambda_3$ (ε) | $\lambda_4$ (ε) | $\lambda_5$ (ε) | $\lambda_6$ (ε) |
|---------------------|-----------------|-----------------|-----------------|-----------------|-----------------|-----------------|
| $H_2L^{Me}$         | 253 (3.0)       | 277 (2.0)       | 372 (9.5)       | 389sh (8.6)     |                 |                 |
| $H_2L^{Et}$         | 230sh (14.9)    | 277 (27)        | 372 (8.9)       |                 |                 |                 |
| $H_2L^{iPr}$        | 258 (26.7)      | 311 (12.7)      | 422 (19.2)      | 439sh (16.9)    |                 |                 |
| $H_2L^{Ph}$         | 251 (11.9)      | 289 (18.3)      | 364 (14.9)      | 406 (14.6)      | 422sh (13.2)    |                 |
| $[Zn_4(L^{Me})_4]$  | 354             | 472             | 531sh           |                 |                 |                 |
| $[Zn_4(L^{Et})_4]$  | 254 (22.8)      | 368 (40.8)      | 532 (33.3)      |                 |                 |                 |
| $[Zn_4(L^{iPr})_4]$ | 261 (33.8)      | 360 (39.6)      | 528 (45.3)      |                 |                 |                 |
| $[Zn_4(L^{Ph})_4]$  | 277 (48.5)      | 367 (32.5)      | 550 (39.3)      |                 |                 |                 |
| $[Ni_4(L^{Me})_4]$  | 295             | 385             | 578             |                 | 600             |                 |
| $[Ni_4(L^{Et})_4]$  | 283 (22.3)      | 392 (35.5)      | 579sh (24.7)    |                 | 602 (25.6)      | 703sh (3.1)     |
| $[Ni_4(L^{iPr})_4]$ | 241 (46.4)      | 293 (30.3)      | 390 (53.7)      | 579sh (37.3)    | 601 (38.0)      | 702sh (4.1)     |
| $[Ni_4(L^{Ph})_4]$  | 277 (29.9)      | 396 (39.3)      | 450sh (15.2)    | 585sh (33.9)    | 623 (39.4)      | 720sh (2.6)     |

<sup>a</sup> Measured in THF, wavelengths  $\lambda$  in nm (extinction coefficients  $\epsilon$  in  $1000\text{ M}^{-1}\text{cm}^{-1}$ )

**Table S5.** Selected DFT-calculated and experimental bond lengths /Å and bond angles /° of Zn complexes.

|              | $[Zn_4(L^{Me})_4]$<br>def2-TZVP | $[Zn_4(L^{Et})_4]$<br>def2-TZVP | $[Zn_4(L^{iPr})_4]$<br>def-SV(P) | $[Zn_4(L^{Ph})_4]$ | $[Zn_4(L^{Ph})_4]$<br>def-SV(P) | $[Zn_4(L^{Ph})_4]$ |
|--------------|---------------------------------|---------------------------------|----------------------------------|--------------------|---------------------------------|--------------------|
| bond lengths | calc.                           | calc.                           | calc.                            | exp.               | calc.                           | exp.               |
| M–N2'        | 2.178                           | 2.169                           | 2.177                            |                    | 2.178                           |                    |
| M–N2         | 2.178                           | 2.169                           | 2.177                            | 2.21(2)            | 2.176                           | 2.19(2)            |
| M–N1         | 2.310                           | 2.311                           | 2.249                            | 2.28(1)            | 2.252                           | 2.20(2)            |
| M–N1'        | 2.310                           | 2.312                           | 2.249                            |                    | 2.253                           |                    |
| M–S1         | 2.449                           | 2.453                           | 2.477                            | 2.380(5)           | 2.481                           | 2.42(1)            |
| M–S1'        | 2.449                           | 2.453                           | 2.477                            |                    | 2.482                           |                    |
| S1–C4        | 1.717                           | 1.716                           | 1.724                            | 1.54(2)            | 1.723                           | 1.62(3)            |
| S1'–C4'      | 1.717                           | 1.716                           | 1.724                            |                    | 1.723                           |                    |
| N(4)–C(4)    | 1.364                           | 1.364                           | 1.365                            | 1.42(2)            | 1.367                           | 1.19(3)            |
| N(4')–C(4')  | 1.364                           | 1.364                           | 1.365                            |                    | 1.367                           |                    |

|               |       |       |       |          |       |          |
|---------------|-------|-------|-------|----------|-------|----------|
| N(3)–C(4)     | 1.352 | 1.353 | 1.357 | 1.44(3)  | 1.359 | 1.42(4)  |
| N(3')–C(4')   | 1.352 | 1.353 | 1.357 |          | 1.359 |          |
| N(3)–N(2)     | 1.335 | 1.336 | 1.329 | 1.35(2)  | 1.325 | 1.18(3)  |
| N(2')–N(3')   | 1.335 | 1.336 | 1.329 |          | 1.325 |          |
| N(2)–C(3)     | 1.320 | 1.320 | 1.332 | 1.22(2)  | 1.333 | 1.52(3)  |
| N(2')–C(3')   | 1.320 | 1.320 | 1.332 |          | 1.333 |          |
| angles        |       |       |       |          |       |          |
| N(2')–M–N(2)  | 157.3 | 157.8 | 167.1 | 154.6(7) | 163.2 | 161.2(9) |
| N(2')–M–N(1)  | 90.2  | 90.7  | 96.8  | 90.0(6)  | 93.5  | 92.4(8)  |
| N(2)–M–N(1)   | 73.3  | 73.2  | 74.1  | 71.1(6)  | 74.4  | 74.0(8)  |
| N(2')–M–N(1') | 73.3  | 73.2  | 74.1  |          | 74.4  |          |
| N(2)–M–N(1')  | 90.3  | 90.7  | 96.8  |          | 93.4  |          |
| N(1)–M–N(1')  | 88.2  | 88.2  | 89.6  | 84.7(6)  | 89.8  | 88.4(6)  |
| N(2')–M–S(1)  | 114.8 | 114.4 | 107.8 | 117.0(4) | 110.9 | 115.2(6) |
| N(2)–M–S(1)   | 80.5  | 80.5  | 80.5  | 79.9(4)  | 80.2  | 77.1(6)  |
| N(1)–M–S(1)   | 153.8 | 153.7 | 154.4 | 150.9(5) | 154.7 | 151.0(5) |
| N(1')–M–S(1)  | 91.5  | 91.7  | 90.2  |          | 90.6  |          |
| N(2')–M–S(1') | 80.5  | 80.5  | 80.5  |          | 80.2  |          |
| N(2)–M–S(1')  | 114.7 | 114.4 | 107.8 |          | 111.1 |          |
| N(1)–M–S(1')  | 91.5  | 91.7  | 90.2  | 93.6(4)  | 90.6  | 91.0(5)  |
| N(1')–M–S(1') | 153.8 | 153.7 | 154.4 |          | 154.6 |          |
| S(1)–M–S(1')  | 99.9  | 99.7  | 100.7 | 101.3(3) | 99.6  | 103.0(3) |

**Table S6.** Selected DFT-calculated and experimental bond lengths /Å and bond angles /° of Ni complexes.

|              | [Ni <sub>4</sub> (L <sup>Me</sup> ) <sub>4</sub> ]<br>def-SV(P) | [Ni <sub>4</sub> (L <sup>Me</sup> ) <sub>4</sub> ] | [Ni <sub>4</sub> (L <sup>Me</sup> ) <sub>4</sub> ] | [Ni <sub>4</sub> (L <sup>Et</sup> ) <sub>4</sub> ]d<br>ef-SV(P) | Ni <sub>4</sub> (L <sup>Et</sup> ) <sub>4</sub> | [Ni <sub>4</sub> (L <sup>iPr</sup> ) <sub>4</sub> ] | [Ni <sub>4</sub> (L <sup>Ph</sup> ) <sub>4</sub> ]d<br>ef-SV(P) |
|--------------|-----------------------------------------------------------------|----------------------------------------------------|----------------------------------------------------|-----------------------------------------------------------------|-------------------------------------------------|-----------------------------------------------------|-----------------------------------------------------------------|
| bond lengths | calc.                                                           | exp. (RT)                                          | exp. (TT)                                          | calc.                                                           | exp.                                            | exp.                                                | calc.                                                           |
| M–N2'        | 1.881                                                           |                                                    | 2.00(2)                                            | 1.883                                                           | 2.01(2)                                         |                                                     | 1.886                                                           |
| M–N2         | 2.013                                                           | 1.96(1)                                            | 1.99(2)                                            | 2.006                                                           | 2.01(2)                                         | 2.02(3)                                             | 2.007                                                           |
| M–N1         | 2.688                                                           | 2.09(1)                                            | 2.10(1)                                            | 2.689                                                           | 2.12(2)                                         | 2.11(3)                                             | 2.690                                                           |
| M–N1'        | 1.903                                                           |                                                    | 2.09(1)                                            | 1.903                                                           | 2.12(2)                                         |                                                     | 1.900                                                           |
| M–S1         | 2.385                                                           | 2.312(8)                                           | 2.373(6)                                           | 2.393                                                           | 2.377(8)                                        | 2.38(2)                                             | 2.389                                                           |
| M–S1'        | 2.225                                                           |                                                    | 2.357(8)                                           | 2.236                                                           | 2.378(8)                                        |                                                     | 2.234                                                           |
| S1–C4        | 1.727                                                           | 1.73(2)                                            | 1.73(2)                                            | 1.730                                                           | 1.70(4)                                         | 1.60(4)                                             | 1.729                                                           |
| S1'–C4'      | 1.750                                                           |                                                    | 1.68(2)                                            | 1.750                                                           |                                                 |                                                     | 1.750                                                           |
| N(4)–C(4)    | 1.372                                                           | 1.38(4)                                            | 1.30(3)                                            | 1.371                                                           | 1.40(4)                                         | 1.57(4)                                             | 1.372                                                           |
| N(4')–C(4')  | 1.369                                                           |                                                    | 1.39(3)                                            | 1.368                                                           |                                                 |                                                     | 1.370                                                           |
| N(3)–C(4)    | 1.341                                                           | 1.28(3)                                            | 1.37(3)                                            | 1.340                                                           | 1.32(4)                                         | 1.28(4)                                             | 1.339                                                           |
| N(3')–C(4')  | 1.331                                                           |                                                    | 1.39(3)                                            | 1.330                                                           |                                                 |                                                     | 1.329                                                           |
| N(3)–N(2)    | 1.348                                                           | 1.37(2)                                            | 1.38(3)                                            | 1.347                                                           | 1.40(2)                                         | 1.38(4)                                             | 1.342                                                           |
| N(2')–N(3')  | 1.348                                                           |                                                    | 1.39(3)                                            | 1.349                                                           |                                                 |                                                     | 1.345                                                           |
| N(2)–C(3)    | 1.337                                                           | 1.34(3)                                            | 1.30(3)                                            | 1.337                                                           | 1.39(4)                                         | 1.28(4)                                             | 1.339                                                           |
| N(2')–C(3')  | 1.349                                                           |                                                    | 1.28(2)                                            | 1.349                                                           |                                                 |                                                     | 1.357                                                           |
| angles       |                                                                 |                                                    |                                                    |                                                                 |                                                 |                                                     |                                                                 |
| N(2')–M–N(2) | 154.3                                                           | 171.0(6)                                           | 168.4(7)                                           | 155.1                                                           | 166(1)                                          | 168.7(9)                                            | 156.6                                                           |

|               |       |          |          |       |          |          |       |
|---------------|-------|----------|----------|-------|----------|----------|-------|
| N(2')-M-N(1)  | 82.7  | 95.0(6)  | 93.8(7)  | 83.0  | 92.6(8)  | 93.7(9)  | 84.3  |
| N(2)-M-N(1)   | 71.6  | 78.5.(6) | 79.1(6)  | 72.2  | 77.3(10) | 78.4(9)  | 72.3  |
| N(2')-M-N(1') | 83.7  |          | 77.1(7)  | 83.8  | 77.3(10) |          | 84.0  |
| N(2)-M-N(1')  | 95.0  |          | 93.3(7)  | 95.7  | 92.6(8)  |          | 96.2  |
| N(1)-M-N(1')  | 88.2  | 88.7(5)  | 88.0(6)  | 86.0  | 91.4(9)  | 92(1)    | 87.6  |
| N(2')-M-S(1)  | 120.4 | 105.0(5) | 104.4(5) | 119.6 | 108.9(6) | 106.2(9) | 118.1 |
| N(2)-M-S(1)   | 85.3  | 81.2(5)  | 82.0(5)  | 85.2  | 81.0(7)  | 81.6(8)  | 85.3  |
| N(1)-M-S(1)   | 156.9 | 159.7(4) | 160.9(4) | 157.2 | 158.3(7) | 159.9(8) | 157.6 |
| N(1')-M-S(1)  | 94.3  | 91.8(5)  | 90.3(5)  | 93.7  | 90.8(6)  | 90.3(7)  | 93.5  |
| N(2')-M-S(1') | 83.7  |          | 77.1(7)  | 85.5  | 81.0(7)  |          | 85.8  |
| N(2)-M-S(1')  | 93.6  |          | 105.7(5) | 92.7  | 108.9(6) |          | 91.9  |
| N(1)-M-S(1')  | 87.6  |          | 90.2(4)  | 89.5  | 90.8(6)  |          | 88.3  |
| N(1')-M-S(1') | 168.8 |          | 160.2(4) | 168.8 | 158.3(7) |          | 169.4 |
| S(1)-M-S(1')  | 93.7  | 94.6(3)  | 97.6(2)  | 94.4  | 95.0(5)  | 94.5(9)  | 94.0  |

**Table S7.** Atom coordinates of the geometry optimized molecular structure of  $[\text{Ni}_4(\text{L}^{\text{Me}})_4]$  on DFT BP86/def-SV(P) level.

|    | X        | y        | z        |   | x        | y        | z        |
|----|----------|----------|----------|---|----------|----------|----------|
| S  | -5.16284 | -4.53517 | 0.41199  | C | -4.62181 | 4.98306  | 2.15046  |
| Ni | -2.99413 | -4.21768 | 0.02753  | C | -1.09874 | 3.54096  | -0.81977 |
| C  | -4.98306 | -4.62181 | 2.15046  | C | -0.78830 | 3.57477  | 1.47841  |
| S  | -2.76737 | -6.22854 | -1.23388 | N | -4.08940 | 3.31758  | -2.86719 |
| N  | -3.41909 | -1.59747 | 0.44793  | C | -2.02107 | 3.47536  | -1.95301 |
| N  | -3.30964 | -3.33209 | -1.75225 | C | 5.40515  | -3.10652 | -2.71391 |
| N  | -1.12539 | -3.86000 | 0.06107  | C | 4.62181  | -4.98306 | 2.15046  |
| N  | -2.81177 | -4.24252 | 1.89938  | C | 3.74521  | -0.29585 | -0.98492 |
| N  | -6.09512 | -4.82922 | 2.92066  | C | 3.82597  | -0.60788 | 1.34847  |
| N  | -3.81376 | -4.47768 | 2.77053  | N | 4.47768  | -3.81376 | 2.77053  |
| C  | -3.10652 | -5.40515 | -2.71391 | C | 4.05711  | -1.56562 | 2.38194  |
| C  | -3.54096 | -1.09874 | -0.81977 | N | -6.12889 | 3.13635  | -3.87880 |
| C  | -3.57477 | -0.78830 | 1.47841  | N | -4.82922 | 6.09512  | 2.92066  |
| N  | -3.31758 | -4.08940 | -2.86719 | C | 0.29585  | 3.74521  | -0.98492 |
| C  | -3.47536 | -2.02107 | -1.95301 | H | -1.24622 | 3.49777  | 2.48245  |
| C  | -0.29585 | -3.74521 | -0.98492 | C | 0.60788  | 3.82597  | 1.34847  |
| C  | -0.60788 | -3.82597 | 1.34847  | C | -1.53759 | 3.63692  | -3.37386 |
| C  | -1.56562 | -4.05711 | 2.38194  | N | 6.12889  | -3.13635 | -3.87880 |
| H  | -5.95151 | -5.06335 | 3.90602  | N | 4.82922  | -6.09512 | 2.92066  |
| H  | -6.95765 | -5.13835 | 2.47069  | C | 3.54096  | 1.09874  | -0.81977 |
| N  | -3.13635 | -6.12889 | -3.87880 | H | 3.82036  | -0.77232 | -1.97163 |
| C  | -3.74521 | 0.29585  | -0.98492 | C | 3.57477  | 0.78830  | 1.47841  |
| H  | -3.49777 | -1.24622 | 2.48245  | C | 4.10902  | -1.28235 | 3.85432  |
| C  | -3.82597 | 0.60788  | 1.34847  | H | -5.66837 | 3.51015  | -4.71385 |
| C  | -3.63692 | -1.53759 | -3.37386 | H | -7.14725 | 3.17121  | -3.81583 |
| C  | 1.09874  | -3.54096 | -0.81977 | H | -5.06335 | 5.95151  | 3.90602  |
| H  | -0.77232 | -3.82036 | -1.97163 | H | -5.13835 | 6.95765  | 2.47069  |
| C  | 0.78830  | -3.57477 | 1.47841  | N | 1.12539  | 3.86000  | 0.06107  |
| C  | -1.28235 | -4.10902 | 3.85432  | H | 0.77232  | 3.82036  | -1.97163 |



|    |          |          |          |    |          |          |          |
|----|----------|----------|----------|----|----------|----------|----------|
| H  | -3.51015 | -5.66837 | -4.71385 | C  | 1.56562  | 4.05711  | 2.38194  |
| H  | -3.17121 | -7.14725 | -3.81583 | H  | -0.44459 | 3.78483  | -3.45249 |
| N  | -3.86000 | 1.12539  | 0.06107  | H  | -1.82599 | 2.75090  | -3.98109 |
| H  | -3.82036 | 0.77232  | -1.97163 | H  | -2.05044 | 4.50181  | -3.84900 |
| C  | -4.05711 | 1.56562  | 2.38194  | H  | 5.66837  | -3.51015 | -4.71385 |
| H  | -3.78483 | -0.44459 | -3.45249 | H  | 7.14725  | -3.17121 | -3.81583 |
| H  | -2.75090 | -1.82599 | -3.98109 | H  | 5.06335  | -5.95151 | 3.90602  |
| H  | -4.50181 | -2.05044 | -3.84900 | H  | 5.13835  | -6.95765 | 2.47069  |
| N  | 1.59747  | -3.41909 | 0.44793  | N  | 3.41909  | 1.59747  | 0.44793  |
| C  | 2.02107  | -3.47536 | -1.95301 | C  | 3.47536  | 2.02107  | -1.95301 |
| H  | 1.24622  | -3.49777 | 2.48245  | H  | 3.49777  | 1.24622  | 2.48245  |
| H  | -0.20899 | -3.93931 | 4.07339  | H  | 3.93931  | -0.20899 | 4.07339  |
| H  | -1.88293 | -3.34822 | 4.40165  | H  | 3.34822  | -1.88293 | 4.40165  |
| H  | -1.57929 | -5.09587 | 4.27458  | H  | 5.09587  | -1.57929 | 4.27458  |
| Ni | -4.21768 | 2.99413  | 0.02753  | Ni | 2.99413  | 4.21768  | 0.02753  |
| N  | -4.24252 | 2.81177  | 1.89938  | N  | 2.81177  | 4.24252  | 1.89938  |
| C  | -4.10902 | 1.28235  | 3.85432  | C  | 1.28235  | 4.10902  | 3.85432  |
| Ni | 4.21768  | -2.99413 | 0.02753  | N  | 3.30964  | 3.33209  | -1.75225 |
| N  | 3.33209  | -3.30964 | -1.75225 | C  | 3.63692  | 1.53759  | -3.37386 |
| C  | 1.53759  | -3.63692 | -3.37386 | S  | 2.76737  | 6.22854  | -1.23388 |
| S  | -6.22854 | 2.76737  | -1.23388 | S  | 5.16284  | 4.53517  | 0.41199  |
| S  | -4.53517 | 5.16284  | 0.41199  | N  | 3.81376  | 4.47768  | 2.77053  |
| N  | -1.59747 | 3.41909  | 0.44793  | H  | 0.20899  | 3.93931  | 4.07339  |
| N  | -3.33209 | 3.30964  | -1.75225 | H  | 1.88293  | 3.34822  | 4.40165  |
| N  | -4.47768 | 3.81376  | 2.77053  | H  | 1.57929  | 5.09587  | 4.27458  |
| H  | -3.93931 | 0.20899  | 4.07339  | N  | 3.31758  | 4.08940  | -2.86719 |
| H  | -3.34822 | 1.88293  | 4.40165  | H  | 3.78483  | 0.44459  | -3.45249 |
| H  | -5.09587 | 1.57929  | 4.27458  | H  | 2.75090  | 1.82599  | -3.98109 |
| S  | 6.22854  | -2.76737 | -1.23388 | H  | 4.50181  | 2.05044  | -3.84900 |
| S  | 4.53517  | -5.16284 | 0.41199  | C  | 3.10652  | 5.40515  | -2.71391 |
| N  | 3.86000  | -1.12539 | 0.06107  | C  | 4.98306  | 4.62181  | 2.15046  |
| N  | 4.24252  | -2.81177 | 1.89938  | N  | 3.13635  | 6.12889  | -3.87880 |
| N  | 4.08940  | -3.31758 | -2.86719 | N  | 6.09512  | 4.82922  | 2.92066  |
| H  | 0.44459  | -3.78483 | -3.45249 | H  | 3.51015  | 5.66837  | -4.71385 |
| H  | 1.82599  | -2.75090 | -3.98109 | H  | 3.17121  | 7.14725  | -3.81583 |
| H  | 2.05044  | -4.50181 | -3.84900 | H  | 5.95151  | 5.06335  | 3.90602  |
| C  | -5.40515 | 3.10652  | -2.71391 | H  | 6.95765  | 5.13835  | 2.47069  |

**Table S8.** Atom coordinates of the geometry optimized molecular structure of  $[\text{Ni}_4(\text{L}^{\text{Et}})_4]$  on DFT BP86/def-SV(P) level.

|    | X        | y        | z        |   | x        | y        | z        |
|----|----------|----------|----------|---|----------|----------|----------|
| S  | -5.12745 | -4.61348 | 0.40014  | N | -4.97376 | 6.07224  | 2.82609  |
| Ni | -2.96896 | -4.24033 | 0.01779  | C | 0.28485  | 3.69000  | -0.99245 |
| C  | -4.93834 | -4.74835 | 2.13439  | H | -1.25154 | 3.44978  | 2.47765  |
| S  | -2.66148 | -6.24219 | -1.25620 | C | 0.59571  | 3.78832  | 1.33794  |
| N  | -3.36696 | -1.61741 | 0.45641  | C | -1.46388 | 3.54628  | -3.37563 |
| N  | -3.33540 | -3.37068 | -1.75223 | N | 6.14186  | -3.31533 | -3.90665 |
| N  | -1.11141 | -3.82819 | 0.04888  | N | 4.97732  | -6.07555 | 2.81937  |

|    |          |          |          |    |          |          |          |
|----|----------|----------|----------|----|----------|----------|----------|
| N  | -2.78022 | -4.28998 | 1.89086  | C  | 3.48493  | 1.13061  | -0.81700 |
| N  | -6.04197 | -5.00951 | 2.89977  | H  | 3.80636  | -0.71531 | -1.99654 |
| N  | -3.77277 | -4.58654 | 2.75511  | C  | 3.53320  | 0.79185  | 1.47498  |
| C  | -3.20758 | -5.45638 | -2.69692 | C  | 4.12152  | -1.26700 | 3.82461  |
| C  | -3.48669 | -1.13233 | -0.81602 | H  | -5.69219 | 3.77275  | -4.69994 |
| C  | -3.53919 | -0.79621 | 1.47624  | H  | -7.16019 | 3.33579  | -3.82559 |
| N  | -3.45815 | -4.14835 | -2.84556 | H  | -5.22204 | 5.93633  | 3.80899  |
| C  | -3.43314 | -2.05239 | -1.95111 | H  | -5.28694 | 6.92457  | 2.35998  |
| C  | -0.28379 | -3.69504 | -0.99562 | N  | 1.11267  | 3.82476  | 0.05166  |
| C  | -0.59465 | -3.78694 | 1.33509  | H  | 0.75277  | 3.78804  | -1.98122 |
| C  | -1.54274 | -4.04861 | 2.37167  | C  | 1.54388  | 4.05251  | 2.37383  |
| H  | -5.89207 | -5.25400 | 3.88160  | H  | -0.45967 | 3.07667  | -3.44616 |
| H  | -6.89582 | -5.33380 | 2.44416  | H  | -2.13655 | 2.98891  | -4.05889 |
| N  | -3.37431 | -6.20685 | -3.83209 | C  | -1.39148 | 5.01695  | -3.83745 |
| C  | -3.70838 | 0.25774  | -1.00009 | H  | 5.69176  | -3.77142 | -4.70562 |
| H  | -3.47118 | -1.24016 | 2.48704  | H  | 7.15975  | -3.33338 | -3.83178 |
| C  | -3.80099 | 0.59593  | 1.32679  | H  | 5.22409  | -5.94046 | 3.80275  |
| C  | -3.60179 | -1.52135 | -3.36218 | H  | 5.29166  | -6.92714 | 2.35270  |
| C  | 1.10609  | -3.46003 | -0.82768 | N  | 3.36144  | 1.61394  | 0.45577  |
| H  | -0.75161 | -3.79646 | -1.98409 | C  | 3.43235  | 2.05185  | -1.95108 |
| C  | 0.79693  | -3.51416 | 1.46827  | H  | 3.46204  | 1.23434  | 2.48618  |
| C  | -1.22828 | -4.11400 | 3.84369  | H  | 3.49906  | -0.37414 | 4.05215  |
| H  | -3.85001 | -5.77067 | -4.62730 | H  | 3.67326  | -2.12801 | 4.36622  |
| H  | -3.38201 | -7.22377 | -3.74382 | C  | 5.55966  | -1.04930 | 4.33992  |
| N  | -3.83573 | 1.09814  | 0.03475  | Ni | 2.97076  | 4.23575  | 0.01987  |
| H  | -3.80295 | 0.71548  | -1.99397 | N  | 2.78171  | 4.29113  | 1.89262  |
| C  | -4.05676 | 1.55805  | 2.35180  | C  | 1.22914  | 4.12329  | 3.84554  |
| H  | -3.12773 | -0.52072 | -3.45166 | N  | 3.33545  | 3.37001  | -1.75061 |
| H  | -3.05733 | -2.20584 | -4.04400 | C  | 3.60150  | 1.52259  | -3.36273 |
| C  | -5.07801 | -1.44587 | -3.80542 | S  | 2.66311  | 6.24103  | -1.24992 |
| N  | 1.60481  | -3.33530 | 0.43895  | S  | 5.13036  | 4.60361  | 0.40184  |
| C  | 2.01233  | -3.39629 | -1.97329 | N  | 3.77404  | 4.59101  | 2.75599  |
| H  | 1.25206  | -3.44264 | 2.47386  | H  | 0.33670  | 3.49683  | 4.06336  |
| H  | -0.33677 | -3.48559 | 4.05968  | H  | 2.08550  | 3.68105  | 4.39936  |
| H  | -2.08540 | -3.67114 | 4.39581  | C  | 0.99740  | 5.56178  | 4.35377  |
| C  | -0.99469 | -5.55049 | 4.35669  | N  | 3.45885  | 4.14930  | -2.84265 |
| Ni | -4.22671 | 2.95937  | -0.01877 | H  | 3.12753  | 0.52203  | -3.45354 |
| N  | -4.28538 | 2.79211  | 1.85617  | H  | 3.05715  | 2.20790  | -4.04384 |
| C  | -4.12792 | 1.26135  | 3.82725  | C  | 5.07783  | 1.44786  | -3.80576 |
| Ni | 4.22814  | -2.96100 | -0.02305 | C  | 3.20919  | 5.45733  | -2.69172 |
| N  | 3.33282  | -3.30011 | -1.78933 | C  | 4.94018  | 4.74825  | 2.13522  |
| C  | 1.46413  | -3.55154 | -3.37937 | N  | 3.37683  | 6.20957  | -3.82556 |
| S  | -6.21703 | 2.66168  | -1.31068 | N  | 6.04366  | 5.01213  | 2.89993  |
| S  | -4.58271 | 5.12503  | 0.33775  | H  | 3.85217  | 5.77449  | -4.62157 |
| N  | -1.60430 | 3.33691  | 0.44308  | H  | 3.38450  | 7.22635  | -3.73573 |
| N  | -3.33243 | 3.29852  | -1.78489 | H  | 5.89335  | 5.26176  | 3.88040  |
| N  | -4.57301 | 3.79747  | 2.70841  | H  | 6.89783  | 5.33394  | 2.44313  |
| H  | -3.51027 | 0.36511  | 4.05452  | H  | 5.55803  | -0.85574 | 5.43591  |

|   |          |          |          |   |          |          |          |
|---|----------|----------|----------|---|----------|----------|----------|
| H | -3.67588 | 2.11945  | 4.37040  | H | 0.78955  | 5.56220  | 5.44714  |
| C | -5.56776 | 1.05050  | 4.34068  | H | -0.78802 | -5.54718 | 5.45028  |
| S | 6.21715  | -2.66101 | -1.31622 | H | 1.89962  | 6.18335  | 4.17209  |
| S | 4.58629  | -5.12646 | 0.33175  | H | -0.13225 | -6.02915 | 3.84354  |
| N | 3.83596  | -1.10020 | 0.03180  | H | 6.17728  | -1.95221 | 4.14828  |
| N | 4.28503  | -2.79552 | 1.85215  | H | 0.71234  | -5.62200 | -3.19845 |
| N | 4.09601  | -3.40586 | -2.89472 | H | -5.54693 | -2.45117 | -3.74663 |
| H | 0.45890  | -3.08413 | -3.44979 | H | -5.15104 | -1.08790 | -4.85643 |
| H | 2.13534  | -2.99308 | -4.06320 | H | -0.70692 | 5.61507  | -3.19665 |
| C | 1.39471  | -5.02260 | -3.84039 | H | -5.56843 | 0.85611  | 5.43653  |
| C | -5.40774 | 3.16865  | -2.75273 | H | 6.04403  | -0.18403 | 3.83697  |
| C | -4.72201 | 4.95740  | 2.07403  | H | 5.15108  | 1.09138  | -4.85725 |
| C | -1.10539 | 3.45755  | -0.82390 | H | 2.40471  | -5.48339 | -3.80195 |
| C | -0.79624 | 3.51774  | 1.47189  | H | 5.54664  | 2.45312  | -3.74548 |
| N | -4.09592 | 3.40487  | -2.88999 | H | -6.18048 | 1.95671  | 4.14897  |
| C | -2.01184 | 3.39295  | -1.96925 | H | 0.13630  | 6.04027  | 3.83820  |
| C | 5.40763  | -3.16838 | -2.75804 | H | -1.89566 | -6.17415 | 4.17599  |
| C | 4.72442  | -4.96036 | 2.06830  | H | -6.05588 | 0.18808  | 3.83647  |
| C | 3.70918  | -0.25889 | -1.00231 | H | -1.02022 | 5.07836  | -4.88459 |
| C | 3.79797  | -0.59957 | 1.32435  | H | 5.66295  | 0.75008  | -3.16723 |
| N | 4.57334  | -3.80125 | 2.70369  | H | -2.40033 | 5.48019  | -3.79800 |
| C | 4.05346  | -1.56240 | 2.34874  | H | 1.02227  | -5.08539 | -4.88702 |
| N | -6.14236 | 3.31681  | -3.90093 | H | -5.66320 | -0.74892 | -3.16603 |

**Table S9.** Atom coordinates of the geometry optimized molecular structure of  $[\text{Ni}_4(\text{L}^{\text{Ph}})_4]$  on DFT BP86/def-SV(P) level.

|    | X        | y        | z        |   | x       | y        | z        |
|----|----------|----------|----------|---|---------|----------|----------|
| S  | -5.21009 | -4.49136 | 0.36981  | N | 3.40921 | 6.11706  | -3.84818 |
| Ni | -3.03591 | -4.18355 | 0.02092  | N | 6.14816 | 4.96771  | 2.85001  |
| C  | -5.03390 | -4.70228 | 2.09757  | H | 3.84367 | 5.65164  | -4.65103 |
| S  | -2.78681 | -6.19164 | -1.24823 | H | 3.46919 | 7.13333  | -3.77014 |
| N  | -3.41452 | -1.55826 | 0.47433  | H | 5.99542 | 5.28215  | 3.81201  |
| N  | -3.37594 | -3.30177 | -1.74944 | H | 6.99530 | 5.28216  | 2.37418  |
| N  | -1.16749 | -3.84158 | 0.06557  | C | 4.34501 | -1.24030 | 3.80807  |
| N  | -2.86148 | -4.28840 | 1.89604  | C | 5.18832 | -0.16034 | 4.16814  |
| N  | -6.14773 | -4.96863 | 2.84951  | C | 5.35751 | 0.20486  | 5.51365  |
| N  | -3.87023 | -4.59411 | 2.73118  | C | 4.68878 | -0.50237 | 6.52700  |
| C  | -3.26789 | -5.38256 | -2.69904 | C | 3.85269 | -1.58024 | 6.18314  |
| C  | -3.54208 | -1.06558 | -0.79374 | C | 3.68519 | -1.95012 | 4.84106  |
| C  | -3.58487 | -0.74058 | 1.49772  | H | 5.73873 | 0.38427  | 3.38364  |
| N  | -3.49576 | -4.07095 | -2.84289 | H | 6.02647 | 1.04336  | 5.76995  |
| C  | -3.52387 | -1.98400 | -1.93144 | H | 4.82135 | -0.21734 | 7.58411  |
| C  | -0.33636 | -3.69404 | -0.97545 | H | 3.32034 | -2.13968 | 6.97036  |
| C  | -0.64872 | -3.87060 | 1.35004  | H | 3.03190 | -2.79634 | 4.58358  |
| C  | -1.60031 | -4.16388 | 2.38159  | C | 1.23973 | 4.33866  | 3.81010  |
| H  | -5.99483 | -5.28341 | 3.81138  | C | 1.95130 | 3.68009  | 4.84269  |
| H  | -6.99495 | -5.28293 | 2.37370  | C | 1.58029 | 3.84489  | 6.18479  |

|    |          |          |          |   |          |          |          |
|----|----------|----------|----------|---|----------|----------|----------|
| N  | -3.40981 | -6.11591 | -3.84939 | C | 0.49949  | 4.67699  | 6.52910  |
| C  | -3.69672 | 0.33311  | -0.97454 | C | -0.20954 | 5.34446  | 5.51617  |
| H  | -3.47873 | -1.17024 | 2.51006  | C | 0.15680  | 5.17797  | 4.17064  |
| C  | -3.87486 | 0.64671  | 1.35064  | H | 2.79982  | 3.02994  | 4.58487  |
| C  | 1.06200  | -3.53588 | -0.79527 | H | 2.14117  | 3.31355  | 6.97166  |
| H  | -0.79475 | -3.70648 | -1.97427 | H | 0.21356  | 4.80746  | 7.58624  |
| C  | 0.73774  | -3.57622 | 1.49635  | H | -1.05037 | 6.01036  | 5.77282  |
| H  | -3.84441 | -5.65026 | -4.65204 | H | -0.38932 | 5.72743  | 3.38652  |
| H  | -3.46980 | -7.13220 | -3.77163 | C | -4.34448 | 1.23930  | 3.80909  |
| N  | -3.84320 | 1.16497  | 0.06604  | C | -3.68451 | 1.94883  | 4.84217  |
| H  | -3.70695 | 0.79117  | -1.97355 | C | -3.85181 | 1.57858  | 6.18418  |
| C  | -4.16637 | 1.59945  | 2.38164  | C | -4.68785 | 0.50061  | 6.52785  |
| N  | 1.55465  | -3.40491 | 0.47250  | C | -5.35672 | -0.20634 | 5.51441  |
| C  | 1.98013  | -3.51778 | -1.93316 | C | -5.18773 | 0.15923  | 4.16898  |
| H  | 1.16727  | -3.46713 | 2.50843  | H | -3.03126 | 2.79513  | 4.58483  |
| Ni | -4.18022 | 3.03436  | 0.02060  | H | -3.31935 | 2.13780  | 6.97147  |
| N  | -4.28689 | 2.86082  | 1.89567  | H | -4.82027 | 0.21529  | 7.58491  |
| Ni | 4.18018  | -3.03431 | 0.01912  | H | -6.02564 | -1.04492 | 5.77057  |
| N  | 3.29805  | -3.37099 | -1.75136 | H | -5.73825 | -0.38516 | 3.38441  |
| S  | -6.18957 | 2.78946  | -1.24759 | C | -1.23915 | -4.33986 | 3.80903  |
| S  | -4.48135 | 5.20962  | 0.36866  | C | -0.15614 | -5.17925 | 4.16910  |
| N  | -1.55461 | 3.40482  | 0.47370  | C | 0.21042  | -5.34622 | 5.51451  |
| N  | -3.29835 | 3.37153  | -1.74991 | C | -0.49847 | -4.67914 | 6.52780  |
| N  | -4.59053 | 3.87067  | 2.73025  | C | -1.57936 | -3.84695 | 6.18396  |
| S  | 6.18934  | -2.78906 | -1.24930 | C | -1.95059 | -3.68169 | 4.84197  |
| S  | 4.48136  | -5.20967 | 0.36652  | H | 0.38989  | -5.72842 | 3.38471  |
| N  | 3.84316  | -1.16493 | 0.06512  | H | 1.05133  | -6.01217 | 5.77079  |
| N  | 4.28713  | -2.86130 | 1.89421  | H | -0.21238 | -4.80997 | 7.58484  |
| N  | 4.06687  | -3.49021 | -2.84512 | H | -2.14014 | -3.31593 | 6.97110  |
| C  | -5.37943 | 3.26618  | -2.69923 | H | -2.79917 | -3.03148 | 4.58451  |
| C  | -4.69456 | 5.03449  | 2.09628  | C | 3.74032  | 1.44330  | -3.31171 |
| C  | -1.06216 | 3.53619  | -0.79410 | C | 2.73590  | 1.55411  | -4.30042 |
| C  | -0.73754 | 3.57582  | 1.49748  | C | 2.94474  | 1.03995  | -5.58881 |
| N  | -4.06732 | 3.49103  | -2.84353 | C | 4.16055  | 0.40999  | -5.91428 |
| C  | -1.98046 | 3.51841  | -1.93185 | C | 5.16461  | 0.29469  | -4.93949 |
| C  | 5.37900  | -3.26541 | -2.70094 | C | 4.95691  | 0.80847  | -3.64780 |
| C  | 4.69483  | -5.03502 | 2.09416  | H | 1.78185  | 2.04884  | -4.05832 |
| C  | 3.69654  | -0.33278 | -0.97520 | H | 2.14931  | 1.13675  | -6.34649 |
| C  | 3.87503  | -0.64703 | 1.34987  | H | 4.32224  | 0.00649  | -6.92794 |
| N  | 4.59090  | -3.87138 | 2.72847  | H | 6.11636  | -0.20749 | -5.17736 |
| C  | 4.16669  | -1.60005 | 2.38056  | H | 5.75003  | 0.71207  | -2.88836 |
| N  | -6.11247 | 3.40774  | -3.84980 | C | 1.43818  | -3.73390 | -3.31331 |
| N  | -4.95823 | 6.14934  | 2.84767  | C | 1.54734  | -2.72841 | -4.30108 |
| C  | 0.33617  | 3.69442  | -0.97445 | C | 1.03269  | -2.93656 | -5.58940 |
| H  | -1.16691 | 3.46640  | 2.50959  | C | 0.40377  | -4.15271 | -5.91564 |
| C  | 0.64889  | 3.87024  | 1.35104  | C | 0.29010  | -5.15783 | -4.94174 |
| N  | 6.11188  | -3.40669 | -3.85166 | C | 0.80450  | -4.95087 | -3.65018 |
| N  | 4.95860  | -6.15008 | 2.84521  | H | 2.04125  | -1.77410 | -4.05830 |

|    |          |          |          |   |          |          |          |
|----|----------|----------|----------|---|----------|----------|----------|
| C  | 3.54194  | 1.06586  | -0.79399 | H | 1.12826  | -2.14034 | -6.34640 |
| H  | 3.70660  | -0.79056 | -1.97434 | H | -0.00017 | -4.31385 | -6.92921 |
| C  | 3.58507  | 0.74023  | 1.49737  | H | -0.21127 | -6.10985 | -5.18021 |
| H  | -5.64592 | 3.83982  | -4.65327 | H | 0.70944  | -5.74483 | -2.89146 |
| H  | -7.12865 | 3.46963  | -3.77226 | C | -3.74079 | -1.44231 | -3.31154 |
| H  | -5.27445 | 5.99762  | 3.80926  | C | -4.95744 | -0.80744 | -3.64733 |
| H  | -5.26967 | 6.99731  | 2.37133  | C | -5.16529 | -0.29329 | -4.93884 |
| N  | 1.16746  | 3.84165  | 0.06649  | C | -4.16132 | -0.40825 | -5.91376 |
| H  | 0.79440  | 3.70720  | -1.97334 | C | -2.94544 | -1.03823 | -5.58859 |
| C  | 1.60065  | 4.16317  | 2.38254  | C | -2.73645 | -1.55277 | -4.30037 |
| H  | 5.64521  | -3.83857 | -4.65517 | H | -5.75049 | -0.71131 | -2.88778 |
| H  | 7.12807  | -3.46861 | -3.77427 | H | -6.11709 | 0.20890  | -5.17648 |
| H  | 5.27497  | -5.99863 | 3.80679  | H | -4.32312 | -0.00446 | -6.92729 |
| H  | 5.26997  | -6.99792 | 2.36858  | H | -2.15008 | -1.13477 | -6.34637 |
| N  | 3.41457  | 1.55819  | 0.47424  | H | -1.78235 | -2.04752 | -4.05851 |
| C  | 3.52357  | 1.98461  | -1.93143 | C | -1.43872 | 3.73495  | -3.31202 |
| H  | 3.47909  | 1.16960  | 2.50985  | C | -0.80520 | 4.95207  | -3.64864 |
| Ni | 3.03588  | 4.18361  | 0.02164  | C | -0.29099 | 5.15943  | -4.94021 |
| N  | 2.86175  | 4.28784  | 1.89683  | C | -0.40470 | 4.15456  | -5.91437 |
| N  | 3.37565  | 3.30232  | -1.74903 | C | -1.03345 | 2.93827  | -5.58838 |
| S  | 2.78659  | 6.19205  | -1.24690 | C | -1.54791 | 2.72972  | -4.30005 |
| S  | 5.21011  | 4.49133  | 0.37029  | H | -0.71011 | 5.74583  | -2.88971 |
| N  | 3.87064  | 4.59326  | 2.73191  | H | 0.21025  | 6.11157  | -5.17850 |
| N  | 3.49530  | 4.07181  | -2.84227 | H | -0.00090 | 4.31602  | -6.92795 |
| C  | 3.26745  | 5.38338  | -2.69802 | H | -1.12904 | 2.14225  | -6.34558 |
| C  | 5.03420  | 4.70163  | 2.09816  | H | -2.04170 | 1.77529  | -4.05747 |

**Table S10.** Atom coordinates of the geometry optimized molecular structure of  $[\text{Zn}_4(\text{L}^{\text{Me}})_4]$  on DFT BP86/def2-TZPV level.

|    | X       | y        | z        |    | x        | y        | z        |
|----|---------|----------|----------|----|----------|----------|----------|
| C  | 3.50664 | -1.97529 | -3.65285 | H  | -1.43369 | -4.13363 | -4.38828 |
| C  | 3.88040 | -1.51420 | -2.27347 | H  | 0.94557  | -6.91157 | -4.71243 |
| H  | 4.15207 | -1.48385 | -4.38731 | H  | 1.99003  | -7.85129 | -3.66841 |
| C  | 6.40088 | 0.84705  | -2.72891 | H  | -0.86689 | -6.92633 | 4.72344  |
| N  | 7.04561 | 1.37050  | -3.81117 | H  | -1.90879 | -7.86513 | 3.67598  |
| N  | 5.47395 | -0.07815 | -3.06615 | H  | 1.49355  | 4.08822  | -4.38921 |
| S  | 6.82080 | 1.43607  | -1.17202 | N  | 0.08811  | 5.41261  | -3.07059 |
| C  | 2.19762 | -3.04221 | -1.18256 | N  | -1.57592 | 3.53104  | -0.10147 |
| N  | 1.64143 | -3.57745 | -0.10446 | N  | -0.57513 | 4.76430  | 2.05928  |
| C  | 3.21598 | -2.06461 | -1.10301 | S  | -1.42594 | 6.76353  | -1.17922 |
| H  | 1.82786 | -3.39859 | -2.14594 | S  | 1.47607  | 6.76890  | 1.19338  |
| N  | 3.59111 | -1.62316 | 0.12617  | C  | -3.42690 | -1.98690 | 3.68048  |
| N  | 4.82067 | -0.62041 | -2.03576 | N  | -4.74789 | -0.63338 | 2.06797  |
| C  | 3.05807 | -2.18150 | 1.20425  | Zn | -5.18085 | -0.02939 | 0.02038  |
| Zn | 5.24653 | -0.01704 | 0.01356  | C  | -0.83670 | 6.34056  | -2.73521 |
| H  | 6.92999 | 0.89731  | -4.70231 | C  | -2.13347 | 2.99601  | -1.17897 |
| H  | 7.86698 | 1.94072  | -3.65475 | C  | -2.01587 | 3.15555  | 1.12813  |
| N  | 4.81621 | 0.58639  | 2.06187  | C  | -1.46654 | 3.82200  | 2.29795  |

|    |          |          |          |
|----|----------|----------|----------|
| N  | 3.58526  | 1.58333  | -0.10211 |
| S  | 6.82380  | -1.46460 | 1.20215  |
| C  | 2.08291  | -3.20219 | 1.12466  |
| Zn | 0.03951  | -5.23695 | 0.00813  |
| H  | 3.41428  | -1.81160 | 2.16764  |
| C  | 3.87336  | 1.47793  | 2.29785  |
| N  | 5.47005  | 0.04702  | 3.09344  |
| C  | 3.05104  | 2.13872  | -1.18113 |
| C  | 3.20841  | 2.02541  | 1.12631  |
| C  | 6.40013  | -0.87565 | 2.75806  |
| C  | 1.53507  | -3.86886 | 2.29505  |
| N  | -1.56486 | -3.57972 | 0.12634  |
| N  | -0.56663 | -4.80657 | -2.03936 |
| N  | 0.64343  | -4.81118 | 2.05732  |
| S  | 1.49005  | -6.80971 | -1.18283 |
| S  | -1.40873 | -6.81576 | 1.19366  |
| C  | 3.49721  | 1.93939  | 3.67645  |
| H  | 3.40862  | 1.76851  | -2.14389 |
| C  | 2.07309  | 3.15688  | -1.10334 |
| C  | 2.18788  | 3.00088  | 1.20413  |
| N  | 7.04507  | -1.39636 | 3.84154  |
| C  | 1.99628  | -3.49499 | 3.67435  |
| C  | -2.12069 | -3.04766 | 1.20621  |
| C  | -2.00884 | -3.20302 | -1.10144 |
| C  | -1.46067 | -3.86574 | -2.27391 |
| N  | -0.02647 | -5.45829 | -3.07186 |
| N  | 0.10362  | -5.46660 | 3.08763  |
| C  | 0.89879  | -6.38632 | -2.73793 |
| C  | -0.81952 | -6.39557 | 2.75040  |
| H  | 4.14274  | 1.44973  | 4.41202  |
| C  | 1.52338  | 3.81988  | -2.27493 |
| N  | 1.63066  | 3.53321  | 0.12511  |
| H  | 1.81726  | 3.35802  | 2.16690  |
| H  | 6.92697  | -0.92273 | 4.73213  |
| H  | 7.86852  | -1.96399 | 3.68655  |
| H  | 1.75401  | -2.44692 | 3.91006  |
| H  | -1.74883 | -3.40504 | 2.16841  |
| C  | -3.14130 | -2.07215 | 1.12996  |
| C  | -2.98684 | -2.18481 | -1.17771 |
| C  | -1.92427 | -3.48979 | -3.65185 |
| N  | 1.42023  | -7.02915 | -3.82232 |
| N  | -1.34049 | -7.04246 | 3.83258  |
| C  | 1.98510  | 3.44421  | -3.65358 |
| N  | 0.62962  | 4.76063  | -2.03897 |
| Zn | 0.02616  | 5.19048  | 0.00941  |
| C  | -3.80474 | -1.52499 | 2.30250  |
| N  | -3.51969 | -1.62971 | -0.09786 |
| H  | -3.34562 | -1.81432 | -2.13991 |

|   |          |          |          |
|---|----------|----------|----------|
| N | -0.03398 | 5.41949  | 3.08903  |
| C | 0.88882  | 6.34846  | 2.75080  |
| H | -4.07153 | -1.49748 | 4.41700  |
| N | -5.40039 | -0.09428 | 3.10054  |
| N | -3.52534 | 1.57672  | 0.13122  |
| N | -4.75763 | 0.57443  | -2.02935 |
| S | -6.75664 | -1.48224 | -1.16350 |
| S | -6.75662 | 1.41783  | 1.21142  |
| N | -1.35954 | 6.98370  | -3.81874 |
| H | -1.76491 | 3.35257  | -2.14275 |
| C | -3.15174 | 2.01841  | -1.09834 |
| C | -2.99094 | 2.13485  | 1.20875  |
| C | -1.92608 | 3.44794  | 3.67776  |
| N | 1.41124  | 6.99508  | 3.83243  |
| C | -6.33091 | 0.82848  | 2.76662  |
| C | -3.81763 | 1.46823  | -2.26807 |
| N | -5.41222 | 0.03239  | -3.05902 |
| C | -6.33872 | -0.89287 | -2.72079 |
| H | -0.88604 | 6.86635  | -4.70950 |
| H | -1.92912 | 7.80581  | -3.66387 |
| H | -3.34596 | 1.76478  | 2.17252  |
| H | -1.43594 | 4.09507  | 4.41161  |
| H | 0.93878  | 6.87881  | 4.72389  |
| H | 1.97940  | 7.81774  | 3.67527  |
| N | -6.97445 | 1.34890  | 3.85108  |
| C | -3.44557 | 1.92956  | -3.64783 |
| N | -6.98484 | -1.41608 | -3.80233 |
| H | -6.85520 | 0.87501  | 4.74138  |
| H | -7.79810 | 1.91655  | 3.69731  |
| H | -4.09193 | 1.43828  | -4.38158 |
| H | -6.87036 | -0.94271 | -4.69352 |
| H | -7.80601 | -1.98635 | -3.64499 |
| H | -2.39702 | 1.68974  | -3.88390 |
| H | 3.07533  | 3.55720  | -3.75233 |
| H | 2.44853  | 1.69783  | 3.91017  |
| H | 1.50703  | -4.14222 | 4.40870  |
| H | -3.01658 | 3.55780  | 3.77707  |
| H | -3.53718 | -3.07747 | 3.77846  |
| H | -1.68546 | -2.44037 | -3.88507 |
| H | 3.61917  | -3.06554 | -3.75175 |
| H | -2.37793 | -1.74539 | 3.91298  |
| H | 3.08690  | -3.60487 | 3.77232  |
| H | 3.60764  | 3.02994  | 3.77464  |
| H | 1.74594  | 2.39485  | -3.88670 |
| H | 2.45778  | -1.73546 | -3.88758 |
| H | -3.55819 | 3.01984  | -3.74640 |
| H | -1.68351 | 2.39984  | 3.91305  |
| H | -3.01462 | -3.60281 | -3.74916 |

**Table S11.** Atom coordinates of the geometry optimized molecular structure of  $[\text{Zn}_4(\text{L}^{\text{Et}})_4]$  on DFT BP86/def2-TZPV level.

|    | X        | y        | z        |    | x        | y        | z        |
|----|----------|----------|----------|----|----------|----------|----------|
| C  | 3.50890  | -1.91946 | -3.67728 | H  | -1.82849 | -7.89471 | 3.70452  |
| C  | 4.36882  | -3.10483 | -4.15592 | H  | 2.15465  | 2.41289  | -3.75711 |
| C  | 3.85464  | -1.47402 | -2.28080 | C  | 3.07449  | 4.33711  | -4.18727 |
| H  | 2.44302  | -2.18306 | -3.73715 | N  | 0.04418  | 5.44105  | -3.09646 |
| H  | 4.22919  | -3.98882 | -3.51833 | N  | -1.63700 | 3.52477  | -0.12507 |
| H  | 5.43308  | -2.83572 | -4.14011 | N  | -0.65558 | 4.78662  | 2.01823  |
| H  | 4.09948  | -3.38368 | -5.18442 | S  | -1.51134 | 6.76372  | -1.21966 |
| C  | 6.38801  | 0.86703  | -2.74467 | S  | 1.38568  | 6.80083  | 1.16057  |
| N  | 7.04631  | 1.36538  | -3.82974 | C  | -3.47406 | -1.95510 | 3.69385  |
| N  | 5.46889  | -0.07064 | -3.07218 | N  | -4.79153 | -0.66126 | 2.04199  |
| S  | 6.78329  | 1.49265  | -1.19604 | Zn | -5.21424 | -0.06232 | 0.00048  |
| C  | 2.18522  | -3.02148 | -1.17795 | H  | 3.96093  | 4.20024  | -3.55249 |
| N  | 1.63718  | -3.55328 | -0.09459 | H  | 2.80526  | 5.40139  | -4.17479 |
| C  | 3.19140  | -2.02997 | -1.11152 | H  | 3.34946  | 4.06362  | -5.21572 |
| H  | 1.82009  | -3.39878 | -2.13478 | C  | -0.89215 | 6.36157  | -2.76912 |
| N  | 3.56959  | -1.58480 | 0.11665  | C  | -2.18526 | 2.98394  | -1.20384 |
| N  | 4.80336  | -0.58901 | -2.03630 | C  | -2.07024 | 3.14417  | 1.10662  |
| C  | 3.04378  | -2.13841 | 1.20009  | C  | -1.52197 | 3.82290  | 2.27062  |
| Zn | 5.21493  | 0.03442  | 0.00018  | N  | -0.14562 | 5.46647  | 3.04897  |
| H  | 6.93498  | 0.87925  | -4.71431 | C  | 0.77356  | 6.40124  | 2.71350  |
| H  | 7.86060  | 1.94682  | -3.67865 | H  | -2.40369 | -2.19916 | 3.75623  |
| N  | 4.79178  | 0.65057  | 2.03651  | C  | -4.31298 | -3.15184 | 4.18139  |
| N  | 3.53919  | 1.62236  | -0.11665 | N  | -5.46696 | -0.14705 | 3.07354  |
| S  | 6.81046  | -1.39377 | 1.19687  | N  | -3.56887 | 1.55767  | 0.10302  |
| C  | 2.07088  | -3.16260 | 1.13378  | N  | -4.80294 | 0.54371  | -2.04126 |
| Zn | 0.04859  | -5.22849 | 0.02231  | S  | -6.78247 | -1.53097 | -1.18294 |
| H  | 3.41085  | -1.76298 | 2.15691  | S  | -6.80928 | 1.37670  | 1.18466  |
| C  | 3.82678  | 1.51786  | 2.28082  | N  | -1.39505 | 7.01506  | -3.85501 |
| N  | 5.46706  | 0.14524  | 3.07252  | H  | -1.82050 | 3.35344  | -2.16385 |
| C  | 3.00307  | 2.16585  | -1.20017 | C  | -3.19116 | 1.99276  | -1.12891 |
| C  | 3.15319  | 2.06099  | 1.11145  | C  | -3.04289 | 2.12036  | 1.18169  |
| C  | 6.40361  | -0.77510 | 2.74530  | C  | -1.95550 | 3.47559  | 3.67044  |
| C  | 1.52284  | -3.83155 | 2.30354  | N  | 1.26384  | 7.07375  | 3.79351  |
| N  | -1.57101 | -3.58275 | 0.12500  | H  | -4.15716 | -4.03818 | 3.55085  |
| N  | -0.56598 | -4.82538 | -2.01851 | H  | -5.38187 | -2.90191 | 4.16292  |
| N  | 0.65626  | -4.79725 | 2.05947  | H  | -4.03938 | -3.41772 | 5.21219  |
| S  | 1.51210  | -6.80165 | -1.16094 | C  | -6.40302 | 0.77091  | 2.73834  |
| S  | -1.38502 | -6.81887 | 1.21937  | C  | -3.85458 | 1.42698  | -2.29336 |
| C  | 3.47314  | 1.95735  | 3.67720  | N  | -5.46858 | 0.01646  | -3.07257 |
| H  | 3.37673  | 1.79686  | -2.15695 | C  | -6.38743 | -0.91859 | -2.73693 |
| C  | 2.01161  | 3.17209  | -1.13401 | H  | -0.91253 | 6.89988  | -4.74106 |
| C  | 2.12908  | 3.03398  | 1.17775  | H  | -1.97578 | 7.83007  | -3.70507 |
| N  | 7.07131  | -1.26051 | 3.83048  | H  | -3.40964 | 1.75281  | 2.14169  |
| C  | 1.95690  | -3.47272 | 3.70029  | H  | -2.19960 | 2.40543  | 3.73622  |

|    |          |          |          |   |          |          |          |
|----|----------|----------|----------|---|----------|----------|----------|
| C  | -2.12921 | -3.05244 | 1.20388  | C | -3.15424 | 4.31624  | 4.15001  |
| C  | -2.01102 | -3.20975 | -1.10661 | H | 0.78345  | 6.95745  | 4.68057  |
| C  | -1.45005 | -3.87781 | -2.27075 | H | 1.82955  | 7.89792  | 3.63638  |
| N  | -0.04304 | -5.49513 | -3.04935 | N | -7.07074 | 1.26577  | 3.81925  |
| N  | 0.14654  | -5.46837 | 3.09603  | C | -3.50947 | 1.86107  | -3.69356 |
| C  | 0.89327  | -6.41279 | -2.71394 | N | -7.04569 | -1.42641 | -3.81762 |
| C  | -0.77270 | -6.40596 | 2.76872  | H | -4.03814 | 4.15770  | 3.51674  |
| H  | 3.65427  | 1.10508  | 4.34683  | H | -2.90444 | 5.38509  | 4.12819  |
| C  | 4.31156  | 3.15818  | 4.15544  | H | -3.42401 | 4.04674  | 5.18089  |
| C  | 1.45098  | 3.83038  | -2.30385 | H | -6.95069 | 0.78897  | 4.70774  |
| N  | 1.57116  | 3.55526  | 0.09432  | H | -7.89557 | 1.83087  | 3.66334  |
| H  | 1.75733  | 3.40492  | 2.13451  | H | -3.67506 | 0.99999  | -4.35591 |
| H  | 6.95089  | -0.77627 | 4.71489  | H | -6.93452 | -0.94788 | -4.70634 |
| H  | 7.89636  | -1.82663 | 3.67954  | H | -7.85989 | -2.00664 | -3.66147 |
| H  | 2.20119  | -2.40209 | 3.75713  | C | 3.15568  | -4.30956 | 4.18637  |
| H  | -1.75782 | -3.41550 | 2.16381  | C | -3.07278 | -4.40003 | -4.15065 |
| C  | -3.15314 | -2.07987 | 1.12918  | C | -4.36994 | 3.04224  | -4.18153 |
| C  | -3.00234 | -2.20398 | -1.18145 | H | 2.90571  | -5.37852 | 4.17346  |
| C  | -1.88957 | -3.53795 | -3.67054 | H | 3.42585  | -4.03161 | 5.21489  |
| N  | 1.39647  | -7.07547 | -3.79408 | H | 4.03939  | -4.15640 | 3.55150  |
| N  | -1.26284 | -7.06917 | 3.85454  | H | -2.80360 | -5.46418 | -4.12928 |
| H  | 4.15584  | 4.03937  | 3.51771  | H | -3.34729 | -4.13501 | -5.18144 |
| H  | 5.38050  | 2.90835  | 4.13950  | H | -3.95950 | -4.25789 | -3.51741 |
| H  | 4.03741  | 3.43231  | 5.18394  | H | -5.43412 | 2.77295  | -4.16314 |
| C  | 1.89110  | 3.47897  | -3.70059 | H | -4.10107 | 3.31279  | -5.21237 |
| N  | 0.56676  | 4.77997  | -2.05985 | H | -4.23035 | 3.93143  | -3.55122 |
| Zn | -0.04824 | 5.20048  | -0.02265 | H | -2.44369 | 2.12449  | -3.75598 |
| C  | -3.82697 | -1.52689 | 2.29379  | H | 1.03293  | 3.64169  | -4.36741 |
| N  | -3.53869 | -1.65141 | -0.10264 | H | 2.40269  | 2.20165  | 3.73711  |
| H  | -3.37569 | -1.84294 | -2.14137 | H | 1.10197  | -3.65116 | 4.36725  |
| H  | -1.03113 | -3.70620 | -4.33562 | H | -1.10037 | 3.65967  | 4.33561  |
| H  | 0.91427  | -6.96779 | -4.68125 | H | -3.65529 | -1.09739 | 4.35647  |
| H  | 1.97732  | -7.88907 | -3.63710 | H | -2.15306 | -2.47236 | -3.73596 |
| H  | -0.78224 | -6.94535 | 4.74046  | H | 3.67450  | -1.06388 | -4.34671 |

**Table S12.** Atom coordinates of the geometry optimized molecular structure of  $[\text{Zn}_4(\text{L}^{i\text{Pr}})_4]$  on DFT BP86/def-SV(P) level.

|   | X       | y        | z        |    | x        | y        | z        |
|---|---------|----------|----------|----|----------|----------|----------|
| C | 4.01625 | 17.38829 | 16.64545 | C  | 1.56086  | 21.82601 | 16.01393 |
| C | 2.68595 | 17.56314 | 15.88030 | N  | -0.00293 | 25.13450 | 17.21027 |
| C | 4.07351 | 18.07117 | 18.00856 | N  | -1.62646 | 23.30762 | 20.22454 |
| C | 4.46463 | 15.91055 | 16.71505 | N  | -0.55461 | 24.46152 | 22.36883 |
| H | 4.78710 | 17.93443 | 16.06257 | S  | -1.47738 | 26.48841 | 19.14189 |
| H | 2.35205 | 18.62409 | 15.88549 | S  | 1.47780  | 26.48827 | 21.44024 |
| H | 1.85920 | 16.93784 | 16.28312 | C  | -4.01636 | 17.38849 | 23.93651 |
| H | 2.82517 | 17.26094 | 14.81778 | N  | -4.93667 | 19.05617 | 22.33032 |
| H | 5.46723 | 15.82196 | 17.18797 | Zn | -5.17611 | 19.78015 | 20.29109 |
| H | 4.53576 | 15.48856 | 15.68698 | H  | -0.48118 | 17.95399 | 16.16364 |



|    |          |          |          |   |          |          |          |
|----|----------|----------|----------|---|----------|----------|----------|
| H  | 3.76145  | 15.26722 | 17.28900 | H | -2.14228 | 18.54093 | 16.51164 |
| C  | 6.56480  | 20.50662 | 17.60853 | H | -1.77080 | 17.80680 | 14.92313 |
| N  | 7.33301  | 20.92970 | 16.56268 | H | 0.48120  | 21.60618 | 16.16346 |
| N  | 5.71996  | 19.49896 | 17.27435 | H | 2.14229  | 21.01924 | 16.51147 |
| S  | 6.75664  | 21.29294 | 19.13103 | H | 1.77086  | 21.75350 | 14.92301 |
| C  | 2.23158  | 16.69315 | 19.12676 | C | -0.91520 | 26.07362 | 17.56601 |
| N  | 1.62647  | 16.25236 | 20.22441 | C | -2.23161 | 22.86685 | 19.12691 |
| C  | 3.28593  | 17.64820 | 19.16740 | C | -2.03293 | 22.87330 | 21.45350 |
| H  | 1.86636  | 16.27683 | 18.17596 | C | -1.46311 | 23.52610 | 22.63389 |
| N  | 3.57950  | 18.19828 | 20.38245 | N | 0.00325  | 25.13444 | 23.37184 |
| N  | 4.93662  | 19.05591 | 18.25166 | C | 0.91559  | 26.07349 | 23.01611 |
| C  | 2.99672  | 17.73423 | 21.48320 | H | -4.78718 | 17.93466 | 24.51939 |
| Zn | 5.17611  | 19.77984 | 20.29089 | C | -2.68604 | 17.56328 | 24.70164 |
| H  | 7.27821  | 20.41835 | 15.67748 | N | -5.71999 | 19.49924 | 23.30764 |
| H  | 8.06822  | 21.61858 | 16.72282 | N | -3.57949 | 21.36170 | 20.38262 |
| N  | 4.93674  | 20.50377 | 22.33014 | N | -4.93670 | 20.50411 | 18.25186 |
| N  | 3.57957  | 21.36147 | 20.19941 | S | -6.75671 | 18.26709 | 19.13126 |
| S  | 6.75664  | 18.26668 | 21.45069 | S | -6.75658 | 21.29330 | 21.45098 |
| C  | 2.03298  | 16.68666 | 21.45336 | N | -1.43992 | 26.74225 | 16.49676 |
| Zn | -0.00015 | 14.69337 | 20.29095 | H | -1.86640 | 23.28315 | 18.17610 |
| H  | 3.30891  | 18.20829 | 22.42605 | C | -3.28597 | 21.91180 | 19.16757 |
| C  | 4.07367  | 21.48854 | 22.57329 | C | -2.99667 | 21.82572 | 21.48335 |
| N  | 5.72010  | 20.06069 | 23.30742 | C | -1.91623 | 23.24103 | 24.06198 |
| C  | 2.99677  | 21.82555 | 19.09869 | N | 1.44036  | 26.74206 | 24.08539 |
| C  | 3.28607  | 21.91155 | 21.41447 | H | -2.35210 | 18.62421 | 24.69645 |
| C  | 6.56489  | 19.05300 | 22.97320 | H | -1.85932 | 16.93795 | 24.29880 |
| C  | 1.46319  | 16.03385 | 22.63376 | H | -2.82526 | 17.26108 | 25.76416 |
| N  | -1.62667 | 16.25247 | 20.35752 | C | -6.56478 | 20.50694 | 22.97347 |
| N  | -0.55495 | 15.09851 | 18.21319 | C | -4.07359 | 21.48886 | 18.00875 |
| N  | 0.55468  | 15.09843 | 22.36871 | N | -5.72009 | 20.06110 | 17.27457 |
| S  | 1.47734  | 13.07160 | 19.14171 | C | -6.56492 | 19.05344 | 17.60877 |
| S  | -1.47774 | 13.07168 | 21.44016 | H | -1.03624 | 26.57477 | 15.57087 |
| C  | 4.01646  | 22.17138 | 23.93642 | H | -2.06262 | 27.53458 | 16.65643 |
| H  | 3.30889  | 21.35148 | 18.15582 | H | -3.30883 | 21.35166 | 22.42621 |
| C  | 2.03309  | 22.87318 | 19.12856 | H | -1.31157 | 23.94992 | 24.66521 |
| C  | 2.23178  | 22.86667 | 21.45516 | C | -1.56078 | 21.82599 | 24.56807 |
| N  | 7.33314  | 18.62989 | 24.01902 | H | 1.03667  | 26.57460 | 25.01127 |
| C  | 1.91628  | 16.31898 | 24.06185 | H | 2.06312  | 27.53435 | 23.92573 |
| C  | -2.23176 | 16.69326 | 21.45517 | N | -7.33298 | 20.93004 | 24.01933 |
| C  | -2.03316 | 16.68681 | 19.12857 | C | -4.01635 | 22.17174 | 16.64563 |
| C  | -1.46341 | 16.03399 | 17.94816 | N | -7.33318 | 18.63039 | 16.56294 |
| N  | 0.00283  | 14.42556 | 17.21016 | H | -0.48114 | 21.60607 | 24.41852 |
| N  | -0.00315 | 14.42550 | 23.37174 | H | -2.14230 | 21.01930 | 24.07050 |
| C  | 0.91511  | 13.48643 | 17.56586 | H | -1.77077 | 21.75346 | 25.65899 |
| C  | -0.91549 | 13.48644 | 23.01602 | H | -7.27820 | 20.41867 | 24.90451 |
| H  | 4.78737  | 21.62526 | 24.51922 | H | -8.06816 | 21.61894 | 23.85919 |
| C  | 2.68622  | 21.99643 | 24.70166 | H | -4.78723 | 21.62561 | 16.06279 |
| C  | 1.46332  | 23.52604 | 17.94818 | C | -2.68607 | 21.99685 | 15.88045 |

|    |          |          |          |   |          |          |          |
|----|----------|----------|----------|---|----------|----------|----------|
| N  | 1.62665  | 23.30750 | 20.35753 | H | -7.27841 | 19.14175 | 15.67775 |
| H  | 1.86661  | 23.28299 | 22.40597 | H | -8.06839 | 17.94152 | 16.72310 |
| H  | 7.27839  | 19.14124 | 24.90422 | H | -2.35220 | 20.93589 | 15.88564 |
| H  | 8.06832  | 17.94100 | 23.85884 | H | -1.85930 | 22.62213 | 16.28325 |
| H  | 1.31164  | 15.61008 | 24.66509 | H | -2.82532 | 22.29905 | 14.81793 |
| C  | 1.56077  | 17.73402 | 24.56790 | C | 4.46477  | 23.64914 | 23.86684 |
| H  | -1.86659 | 16.27689 | 22.40596 | C | 3.39873  | 15.95092 | 24.29970 |
| C  | -3.28605 | 17.64839 | 21.41455 | C | -3.39894 | 15.95123 | 16.28221 |
| C  | -2.99684 | 17.73444 | 19.09876 | C | 3.39891  | 23.60898 | 16.28231 |
| C  | -1.91646 | 16.31918 | 16.52008 | C | -4.46480 | 15.91077 | 23.86690 |
| N  | 1.43980  | 12.81783 | 16.49657 | C | -3.39867 | 23.60915 | 24.29980 |
| N  | -1.44022 | 12.81785 | 24.08530 | C | -4.46469 | 23.64948 | 16.71525 |
| H  | 2.35237  | 20.93547 | 24.69644 | H | 5.46733  | 23.73779 | 23.39385 |
| H  | 1.85941  | 22.62172 | 24.29893 | H | 4.53594  | 24.07110 | 24.89492 |
| H  | 2.82551  | 22.29859 | 25.76419 | H | 3.76152  | 24.29245 | 23.29295 |
| C  | 1.91643  | 23.24099 | 16.52009 | H | 3.59568  | 14.89698 | 24.00449 |
| N  | 0.55488  | 24.46153 | 18.21327 | H | 3.64303  | 16.05098 | 25.38144 |
| Zn | 0.00015  | 24.86662 | 20.29105 | H | 4.11076  | 16.59453 | 23.73809 |
| H  | 0.48112  | 17.95390 | 24.41832 | H | -3.59598 | 14.89730 | 16.57739 |
| H  | 2.14227  | 18.54072 | 24.07032 | H | -3.64323 | 16.05133 | 15.20046 |
| H  | 1.77074  | 17.80659 | 25.65882 | H | -4.11093 | 16.59488 | 16.84383 |
| C  | -4.07360 | 18.07138 | 22.57340 | H | 3.59592  | 24.66288 | 16.57759 |
| N  | -3.57958 | 18.19851 | 20.19951 | H | 3.64324  | 23.50898 | 15.20056 |
| H  | -3.30900 | 18.20852 | 18.15591 | H | 4.11089  | 22.96529 | 16.84390 |
| H  | -1.31188 | 15.61024 | 15.91683 | H | -5.46741 | 15.82222 | 23.39398 |
| C  | -1.56084 | 17.73419 | 16.01405 | H | -4.53593 | 15.48877 | 24.89496 |
| H  | 1.03608  | 12.98532 | 15.57070 | H | -3.76165 | 15.26742 | 23.29294 |
| H  | 2.06250  | 12.02549 | 16.65621 | H | -3.59558 | 24.66309 | 24.00457 |
| H  | -1.03650 | 12.98531 | 25.01117 | H | -3.64299 | 23.50913 | 25.38155 |
| H  | -2.06298 | 12.02556 | 23.92565 | H | -4.11072 | 22.96556 | 23.73820 |
| H  | 1.31186  | 23.94997 | 15.91688 | H | -5.46728 | 23.73810 | 17.18820 |
| H  | -3.76148 | 24.29280 | 17.28917 | H | -4.53584 | 24.07148 | 15.68718 |

**Table S13.** Atom coordinates of the geometry optimized molecular structure of  $[\text{Zn}_4(\text{L}^{\text{Ph}})_4]$  on DFT BP86/def-SV(P) level.

|   | X       | y        | z        |   | x        | y        | z        |
|---|---------|----------|----------|---|----------|----------|----------|
| C | 3.91556 | -1.58187 | -2.32198 | H | -0.74613 | 7.10554  | -4.61284 |
| C | 6.45593 | 0.79994  | -2.72403 | H | -1.85576 | 7.99028  | -3.54889 |
| N | 7.18926 | 1.24634  | -3.78779 | H | -3.30565 | 1.67595  | 2.18752  |
| N | 5.55445 | -0.15529 | -3.07196 | H | 0.78022  | 7.08549  | 4.66813  |
| S | 6.74743 | 1.49442  | -1.17420 | H | 1.88985  | 7.97526  | 3.60837  |
| C | 2.13231 | -3.02108 | -1.20050 | N | -7.14879 | 1.22454  | 3.81990  |
| N | 1.60545 | -3.55429 | -0.10240 | N | -7.18990 | -1.25983 | -3.71389 |
| C | 3.19763 | -2.07972 | -1.14816 | H | -7.06185 | 0.70812  | 4.70076  |
| H | 1.70336 | -3.34550 | -2.16284 | H | -7.95716 | 1.82576  | 3.65412  |
| N | 3.55716 | -1.60125 | 0.07852  | H | -7.11252 | -0.74493 | -4.59653 |
| N | 4.82498 | -0.63865 | -2.07665 | H | -7.99641 | -1.86077 | -3.53832 |
| C | 3.03072 | -2.13487 | 1.17662  | C | -2.10586 | 3.64097  | 3.69277  |

|    |          |          |          |   |          |          |          |
|----|----------|----------|----------|---|----------|----------|----------|
| Zn | 5.15194  | -0.01381 | -0.01825 | C | -3.50447 | 3.68151  | 3.90532  |
| H  | 7.10408  | 0.73434  | -4.67139 | C | -4.04568 | 3.45526  | 5.18140  |
| H  | 7.99709  | 1.84706  | -3.61761 | C | -3.19812 | 3.18674  | 6.26907  |
| N  | 4.84498  | 0.60908  | 2.04397  | C | -1.80572 | 3.14836  | 6.07144  |
| N  | 3.55682  | 1.57334  | -0.09810 | C | -1.26234 | 3.37779  | 4.79868  |
| S  | 6.75861  | -1.52276 | 1.12046  | H | -4.18193 | 3.90434  | 3.06421  |
| C  | 2.09039  | -3.20106 | 1.12358  | H | -5.13899 | 3.48468  | 5.31892  |
| Zn | 0.01885  | -5.14979 | -0.00559 | H | -3.62127 | 3.00879  | 7.27191  |
| H  | 3.36005  | -1.71096 | 2.13953  | H | -1.13219 | 2.93812  | 6.91898  |
| C  | 3.93744  | 1.55153  | 2.29895  | H | -0.17219 | 3.34957  | 4.65599  |
| N  | 5.58396  | 0.12464  | 3.03168  | C | 2.14082  | 3.65686  | -3.65355 |
| C  | 3.02006  | 2.10792  | -1.19071 | C | 3.53939  | 3.69808  | -3.86631 |
| C  | 3.20831  | 2.05018  | 1.13240  | C | 4.08026  | 3.47685  | -5.14341 |
| C  | 6.48206  | -0.83018 | 2.67388  | C | 3.23236  | 3.21282  | -6.23193 |
| C  | 1.60012  | -3.92626 | 2.29608  | C | 1.84001  | 3.17390  | -6.03410 |
| N  | -1.56824 | -3.55470 | 0.10179  | C | 1.29697  | 3.39831  | -4.76030 |
| N  | -0.62159 | -4.82439 | -2.05945 | H | 4.21709  | 3.91746  | -3.02448 |
| N  | 0.65721  | -4.83600 | 2.05080  | H | 5.17354  | 3.50665  | -5.28108 |
| S  | 1.51667  | -6.74796 | -1.17179 | H | 3.65523  | 3.03879  | -7.23558 |
| S  | -1.47917 | -6.75533 | 1.14972  | H | 1.16622  | 2.96715  | -6.88230 |
| H  | 3.34078  | 1.68527  | -2.15704 | H | 0.20685  | 3.36966  | -4.61746 |
| C  | 2.07960  | 3.17346  | -1.12778 | C | 3.69729  | 2.11711  | 3.65695  |
| C  | 2.14279  | 2.99064  | 1.19562  | C | 3.73888  | 3.51612  | 3.86664  |
| N  | 7.22548  | -1.27788 | 3.73006  | C | 3.52024  | 4.05968  | 5.14304  |
| C  | -2.09393 | -3.02727 | 1.20324  | C | 3.25848  | 3.21408  | 6.23389  |
| C  | -2.05480 | -3.19533 | -1.12175 | C | 3.21922  | 1.82131  | 6.03910  |
| C  | -1.56547 | -3.91403 | -2.29862 | C | 3.44104  | 1.27559  | 4.76600  |
| N  | -0.14592 | -5.55457 | -3.05794 | H | 3.95648  | 4.19202  | 3.02291  |
| N  | 0.18052  | -5.57177 | 3.04466  | H | 3.55026  | 5.15326  | 5.27833  |
| C  | 0.81101  | -6.45675 | -2.71659 | H | 3.08647  | 3.63908  | 7.23700  |
| C  | -0.77563 | -6.47243 | 2.69703  | H | 3.01422  | 1.14931  | 6.88915  |
| C  | 1.57811  | 3.89982  | -2.29486 | H | 3.41211  | 0.18517  | 4.62553  |
| N  | 1.60560  | 3.52478  | 0.10301  | C | 3.66336  | -2.14913 | -3.67710 |
| H  | 1.72238  | 3.31358  | 2.16218  | C | 3.70453  | -3.54828 | -3.88581 |
| H  | 7.14897  | -0.76666 | 4.61490  | C | 3.47529  | -4.09325 | -5.15975 |
| H  | 8.03154  | -1.87854 | 3.55149  | C | 3.20300  | -3.24899 | -6.24904 |
| H  | -1.66375 | -3.35651 | 2.16342  | C | 3.16384  | -1.85608 | -6.05520 |
| C  | -3.15959 | -2.08596 | 1.15705  | C | 3.39629  | -1.30895 | -4.78460 |
| C  | -2.99584 | -2.12944 | -1.16816 | H | 3.93026  | -4.22316 | -3.04341 |
| N  | 1.24874  | -7.19118 | -3.78316 | H | 3.50538  | -5.18691 | -5.29432 |
| N  | -1.21447 | -7.21286 | 3.75899  | H | 3.02271  | -3.67511 | -7.25021 |
| N  | 0.63595  | 4.80765  | -2.03982 | H | 2.95064  | -1.18511 | -6.90404 |
| Zn | 0.01808  | 5.11961  | 0.02318  | H | 3.36749  | -0.21843 | -4.64486 |
| C  | -3.87591 | -1.59417 | 2.33437  | C | 2.17396  | -3.68026 | 3.64958  |
| N  | -3.52106 | -1.60154 | -0.06672 | C | 3.57420  | -3.72078 | 3.85098  |
| H  | -3.32672 | -1.70095 | -2.12853 | C | 4.12535  | -3.49702 | 5.12324  |
| H  | 0.73055  | -7.10582 | -4.66314 | C | 3.28627  | -3.23099 | 6.21810  |
| H  | 1.85011  | -7.99937 | -3.61701 | C | 1.89235  | -3.19261 | 6.03151  |

|    |          |          |          |   |          |          |          |
|----|----------|----------|----------|---|----------|----------|----------|
| H  | -0.69720 | -7.13236 | 4.63996  | C | 1.33908  | -3.41959 | 4.76260  |
| H  | -1.81544 | -8.02026 | 3.58765  | H | 4.24501  | -3.94161 | 3.00406  |
| N  | 0.14915  | 5.54434  | -3.02809 | H | 5.21972  | -3.52642 | 5.25211  |
| N  | -1.56918 | 3.52455  | -0.06413 | H | 3.71727  | -3.05499 | 7.21796  |
| N  | -0.60042 | 4.79852  | 2.08451  | H | 1.22541  | -2.98427 | 6.88471  |
| S  | -1.49428 | 6.72288  | -1.11583 | H | 0.24783  | -3.39131 | 4.62856  |
| S  | 1.52973  | 6.71832  | 1.16975  | C | -2.14135 | -3.66160 | -3.65008 |
| N  | -4.78616 | -0.65018 | 2.09519  | C | -3.54178 | -3.70281 | -3.84991 |
| Zn | -5.11607 | -0.01437 | 0.04066  | C | -4.09478 | -3.47350 | -5.12038 |
| C  | -0.80509 | 6.44300  | -2.67017 | C | -3.25741 | -3.20102 | -6.21495 |
| C  | -2.10594 | 2.99498  | -1.15917 | C | -1.86330 | -3.16176 | -6.02989 |
| C  | -2.04376 | 3.16817  | 1.16498  | C | -1.30819 | -3.39431 | -4.76280 |
| C  | -1.54268 | 3.88958  | 2.33530  | H | -4.21124 | -3.92863 | -3.00325 |
| N  | -0.11412 | 5.53099  | 3.07616  | H | -5.18926 | -3.50366 | -5.24806 |
| C  | 0.84000  | 6.43146  | 2.72258  | H | -3.68986 | -3.02068 | -7.21340 |
| N  | -5.51425 | -0.17232 | 3.09418  | H | -1.19769 | -2.94841 | -6.88290 |
| N  | -3.52081 | 1.57256  | 0.12802  | H | -0.21682 | -3.36536 | -4.62992 |
| N  | -4.80884 | 0.61814  | -2.01857 | C | -3.65883 | 2.13127  | -3.62500 |
| S  | -6.72429 | -1.51648 | -1.10522 | C | -3.70013 | 3.53101  | -3.82975 |
| S  | -6.71092 | 1.48683  | 1.20706  | C | -3.48032 | 4.07906  | -5.10403 |
| N  | -1.25536 | 7.18393  | -3.72701 | C | -3.21759 | 3.23730  | -6.19763 |
| H  | -1.68507 | 3.32186  | -2.12423 | C | -3.17855 | 1.84384  | -6.00772 |
| C  | -3.17163 | 2.05443  | -1.10034 | C | -3.40157 | 1.29367  | -4.73676 |
| C  | -2.98444 | 2.10254  | 1.22307  | H | -3.91842 | 4.20391  | -2.98381 |
| N  | 1.28965  | 7.16794  | 3.78278  | H | -3.51019 | 5.17310  | -5.23550 |
| C  | -6.41675 | 0.78426  | 2.75272  | H | -3.04468 | 3.66583  | -7.19908 |
| C  | -3.90035 | 1.56083  | -2.26926 | H | -2.97278 | 1.17482  | -6.85991 |
| N  | -5.54753 | 0.13829  | -3.00872 | H | -3.37279 | 0.20275  | -4.60014 |
| C  | -6.44654 | -0.81737 | -2.65547 | C | -3.62145 | -2.16794 | 3.68634  |
| H  | -3.89024 | -4.23879 | 3.04329  | C | -3.66285 | -3.56803 | 3.88851  |
| H  | -3.46214 | -5.21332 | 5.28901  | C | -3.43179 | -4.11905 | 5.15951  |
| H  | -2.97567 | -3.71092 | 7.25119  | C | -3.15736 | -3.28002 | 6.25232  |
| H  | -2.90295 | -1.21934 | 6.91655  | C | -3.11785 | -1.88623 | 6.06494  |
| H  | -3.32306 | -0.24194 | 4.66260  | C | -3.35215 | -1.33308 | 4.79730  |
